# Supplementary material for: An AcOH-mediated metal free approach towards the synthesis of bis-carbolines and imidazopyridoindole derivatives and assessment of their photophysical properties
Source: Royal Society of Chemistry journal article supplement (doi:10.1039/c8ob02705f), 2018-12-14

# AcOH-Mediated Metal Free Approach towards Synthesis of Bis $\beta$ -Carbolines and Imidazopyridoindole Derivatives and Assessment of their Photophysical Properties

Dharmender Singh,<sup>a</sup> Shubham Sharma,<sup>a</sup> Mukesh Kumar,<sup>a</sup> Inderpreet Kaur,<sup>a</sup> Ravi Shankar<sup>b</sup> and Satyendra Kumar Pandey<sup>c</sup> and Virender Singh<sup>a\*</sup>

<sup>a</sup>*Department of Chemistry, Dr B R Ambedkar National Institute of Technology (NIT) Jalandhar, 144011, Punjab, India.*

<sup>b</sup>*Bio-Organic Chemistry Division, CSIR - Indian Institute of Integrative Medicine (IIIM), Jammu, 180 001, India.*

<sup>c</sup>*Department of Chemistry, Banaras Hindu University (BHU), Varanasi, 221005, Uttar Pradesh, India.*

*E mail:- [singhv@nitj.ac.in](mailto:singhv@nitj.ac.in); Fax: (91) 172-2214692*

## Supporting Information

### Table of Contents

|    |                                                                               |       |
|----|-------------------------------------------------------------------------------|-------|
| 1. | Experimental procedures and spectral data                                     | 2-13  |
| 2. | <sup>1</sup> H-NMR, <sup>13</sup> C- NMR and HRMS spectra of the new products | 14-61 |
| 3. | Photophysical studies of synthesised compounds                                | 62-68 |

### Synthesis of 1-formyl-9H-pyrido[3,4-b]indole derivatives (1a-j)

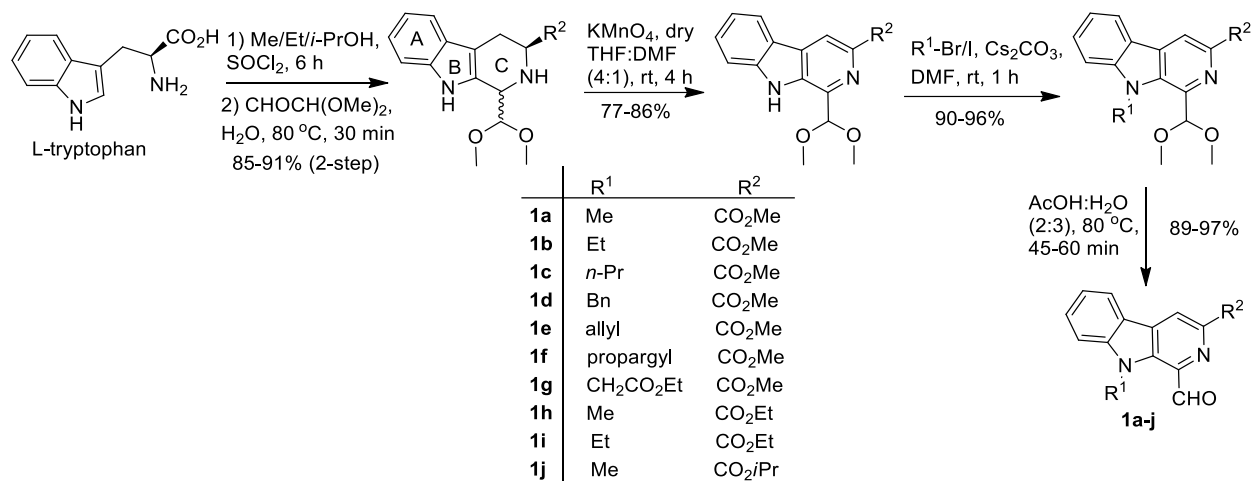

**Scheme 1.** Synthesis of 1-formyl-9H-pyrido[3,4-b]indole derivatives<sup>[1]</sup>

### Synthesis of N-alkylated Kumujian C (1k-l)

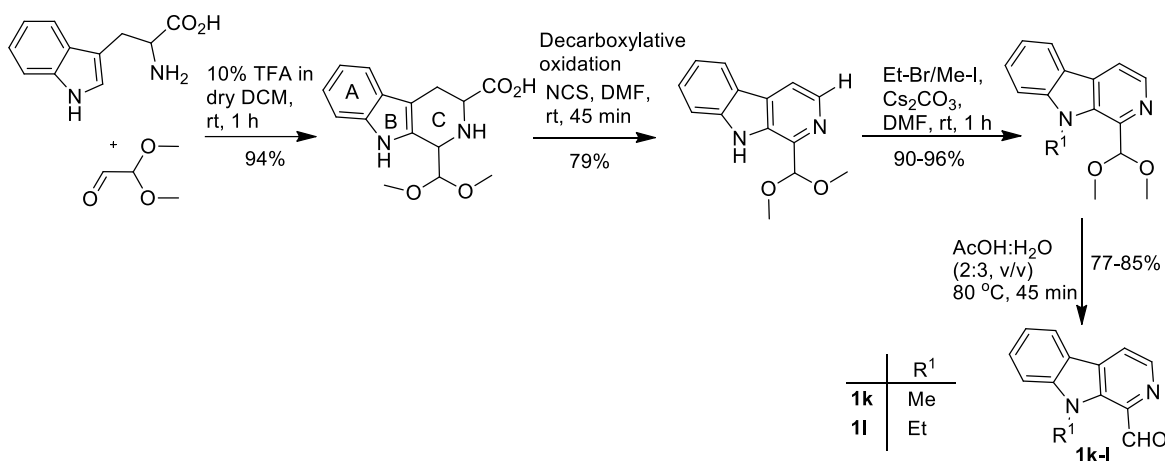

**Scheme 1.** Synthesis of 1-formyl-9H-pyrido[3,4-b]indole derivatives<sup>[2]</sup>

## Experimental Section

**General Methods.** Chemicals and reagents were purchased from Sigma Aldrich, Acros, Spectrochem Ltd., and Avera Synthesis, and used without further purification. Commercially available anhydrous solvents (MeOH, toluene, ACN, diethylether, and DMF) were used as received without further distillation. Thin layer chromatography (TLC) was performed on precoated aluminum plates (E. Merck; silica gel 60 PF254, 0.25 mm). Column chromatography was performed on silica gel (SRL; 60–120 mesh). Melting points were determined in open-ended capillary tubes on a Precision Digital melting-point apparatus (LABCO) that contained silicon oil and are uncorrected. IR spectra were recorded on an Agilent FTIR spectrophotometer. <sup>1</sup>H and <sup>13</sup>C NMR spectra were recorded on an Avance III Bruker spectrometer at operating frequencies of 400 MHz, 500MHz, 600MHz (<sup>1</sup>H) or 100 MHz, 125 MHz, 150 MHz (<sup>13</sup>C), as shown

in the individual spectrum, by using tetramethylsilane (TMS) as an internal standard. HRMS spectra were recorded on 6200 series TOF/6500 series QTOF B.05.01 (B5125). Elemental analysis was performed on a Carlo-Erba 108 or an Elementar Vario EL III microanalyzer. Room temperature varied between 25–40 °C. The multiplicity in the <sup>1</sup>H NMR spectra is as follows: s for singlet, d for doublet, t for triplet, q for quartet, dd for doublet of doublet and m for multiplet.

**Procedure for the synthesis of methyl 1-(4,5-diphenyl-1H-imidazol-2-yl)-9-methyl-9H-pyrido[3,4-*b*]indole-3-carboxylate (3a).** To a stirred suspension of **2** (0.078 g, 0.37 mmol) and ammonium acetate (0.143 g, 1.86 mmol) in 3 mL of acetic acid; **1a** (0.10 g, 0.37 mmol) was added and the reaction content was heated to 100 °C for 1 h. After completion of reaction as examined by TLC, the reaction content was poured into ice cold water, yellow precipitates were formed which were filtered through sintered funnel and dried under vacuum. The crude product was purified through silica gel (60-120 mesh size) column chromatography using hexane : EtOAc (80:20, v/v) to obtain the pure product (**3a**) as pale yellow solid (0.024 g, 14%; *R<sub>f</sub>* = 0.70 (hexane/EtOAc, 60:40, v/v).

**Methyl 1-(4,5-diphenyl-1H-imidazol-2-yl)-9-methyl-9H-pyrido[3,4-*b*]indole-3-carboxylate (3a).** Yield: 14% (0.024 g from 0.10 g) as a pale yellow solid; m.p. 246-248 °C; *R<sub>f</sub>* = 0.70 (hexane/EtOAc, 60:40, v/v); IR (neat):  $\nu_{\max}$  (cm<sup>-1</sup>) = 3407 (NH), 1705 (CO<sub>2</sub>CH<sub>3</sub>); <sup>1</sup>H NMR (400 MHz, CDCl<sub>3</sub>)  $\delta$  = 4.03 (s, 3 H, NCH<sub>3</sub>), 4.59 (s, 3 H, CO<sub>2</sub>CH<sub>3</sub>), 7.30–7.42 (m, 7 H, ArH), 7.61 (d, *J* = 8.1 Hz, 3 H, ArH), 7.68–7.73 (m, 3 H, ArH), 8.21 (d, *J* = 7.8 Hz, 1 H, ArH), 8.82 (s, 1 H, ArH), 11.51 (s, 1 H, NH) ppm; <sup>13</sup>C NMR (125 MHz, CDCl<sub>3</sub>)  $\delta$  = 34.6, 52.4, 110.8, 117.1, 121.0, 121.3, 121.5, 126.9, 127.7, 128.0, 128.2, 128.4, 128.5, 128.8, 129.3, 130.9, 131.5, 133.6, 135.2, 135.6, 136.1, 138.1, 143.8, 144.1, 166.2 ppm; MS (ES): *m/z* (%) = 459.1 (100) [M+1]<sup>+</sup>; C<sub>29</sub>H<sub>22</sub>N<sub>4</sub>O<sub>2</sub> (458.1743): calcd. for C 75.97, H 4.84, N 12.22; found for C 76.09, H 4.85, N 12.18.

**Procedure for the synthesis of methyl 1-cyano-9-methyl-9H-pyrido[3,4-*b*]indole-3-carboxylate (5a).** To a stirred solution of **1a** (0.05, 0.186 mmol), ammonium acetate (0.036 g, 0.466 mmol) and NaHCO<sub>3</sub> (0.024, 0.28 mmol) in 1 mL of DMF; Iodine (0.009 g, 0.037 mmol) was added and the reaction content was stirred at room temperature for 1 h. After completion of reaction as examined by TLC, the reaction content was poured into ice cold water, extracted with EtOAc (3 x 10 mL) and the combined organic layer was washed with 5% aq. Na<sub>2</sub>S<sub>2</sub>O<sub>3</sub> (15 mL). The organic layer was dried over anhydrous Na<sub>2</sub>SO<sub>4</sub> and excess of solvent was evaporated under reduced pressure. The crude product was purified through silica gel (60-120 mesh size) column chromatography using hexane : EtOAc (80:20, v/v) to obtain the pure product (**5a**) as light brown solid (0.022 g, 45%; *R<sub>f</sub>* = 0.60 (hexane/EtOAc, 70:30, v/v).

**Methyl 1-cyano-9-methyl-9H-pyrido[3,4-*b*]indole-3-carboxylate (5a).** Yield: 45% (0.022 g from 0.050 g) as a light brown solid; m.p. 194-196 °C; *R<sub>f</sub>* = 0.60 (hexane/EtOAc, 70:30, v/v); IR (neat):

$\nu_{\max}$  ( $\text{cm}^{-1}$ ) = 2235 (CN), 1706 ( $\text{CO}_2\text{CH}_3$ );  $^1\text{H}$  NMR (400 MHz,  $\text{CDCl}_3$ )  $\delta$  = 4.09 (s, 3 H,  $\text{NCH}_3$ ), 4.34 (s, 3 H,  $\text{CO}_2\text{CH}_3$ ), 7.30 (t,  $J$  = 7.6 Hz, 1 H, ArH), 7.59 (d,  $J$  = 8.4 Hz, 1 H, ArH), 7.77 (t,  $J$  = 7.8 Hz, 1 H, ArH), 8.24 (d,  $J$  = 7.9 Hz, 1 H, ArH), 9.02 (s, 1 H, ArH) ppm;  $^{13}\text{C}$  NMR (100 MHz,  $\text{CDCl}_3$ )  $\delta$  = 31.0, 53.3, 110.4, 114.1, 116.6, 120.3, 120.6, 122.2, 122.3, 130.7, 131.8, 138.5, 138.8, 143.1, 166.3 ppm; MS (ES):  $m/z$  (%) = 266.1 (100)  $[\text{M}+1]^+$ ;  $\text{C}_{15}\text{H}_{11}\text{N}_3\text{O}_2$  (265.0851): calcd. for C 67.92, H 4.18, N 15.84; found for C 68.05, H 4.15, N 15.89.

**General Procedure for the preparation of compounds 4a-j as exemplified for methyl 3-(3-(methoxycarbonyl)-9-methyl-9H-pyrido[3,4-*b*]indol-1-yl)-11-methyl-11-imidazo[1',5':1,2]**

**pyrido[3,4-*b*]indole-5 carboxylate (4a).** To a stirred suspension of **1a** (0.40 g, 1.49 mmol) in 8 mL of acetic acid; ammonium acetate (0.144 g, 1.86 mmol) was added and the reaction content was stirred at room temperature for 2 h. It was observed that suspension of **1a** in AcOH turned into a clear solution with the progress of reaction. After completion of reaction as examined by TLC, the reaction content was poured into ice cold water, yellow precipitates were formed which were filtered through sintered funnel and dried under vacuum. The crude product was washed with 10 mL of methanol and finally triturated and washed twice with 10 mL of anhydrous diethyl ether to obtain analytically pure product (**4a**) as the yellow solid (0.35 g, 91%;  $R_f$  = 0.30 (hexane/EtOAc, 60:40, v/v). A clean reaction was obtained at room temperature in all cases (**4a-4j**) and no column chromatographic purification was required (except **4f**).

**Methyl 3-(3-(methoxycarbonyl)-9-methyl-9H-pyrido[3,4-*b*]indol-1-yl)-11-methyl-11H-imidazo[1',5':1,2]pyrido[3,4-*b*]indole-5-carboxylate (4a).** Yield: 91% (0.35 g from 0.20 g) as a yellow solid; m.p. 220-222 °C;  $R_f$  = 0.30 (hexane/EtOAc, 60:40, v/v); IR (neat):  $\nu_{\max}$  ( $\text{cm}^{-1}$ ) = 1724 ( $\text{CO}_2\text{CH}_3$ );  $^1\text{H}$  NMR (400 MHz,  $\text{CDCl}_3$ )  $\delta$  = 3.32 (s, 3 H,  $\text{CO}_2\text{CH}_3$ ), 3.99 (s, 3 H,  $\text{NCH}_3$ ), 4.01 (s, 3 H,  $\text{CO}_2\text{CH}_3$ ), 4.24 (s, 3 H,  $\text{NCH}_3$ ), 7.35 (t,  $J$  = 7.5 Hz, 1 H, ArH), 7.40 (t,  $J$  = 7.4 Hz, 1 H, ArH), 7.48 (t,  $J$  = 7.6 Hz, 1 H, ArH), 7.54–7.57 (m, 2 H, ArH), 7.67 (t,  $J$  = 8.0 Hz, 1 H, ArH), 7.95 (d,  $J$  = 7.8 Hz, 1 H, ArH), 8.04 (s, 1 H, ArH), 8.18 (s, 1 H, ArH), 8.25 (d,  $J$  = 7.8 Hz, 1 H, ArH), 8.91 (s, 1 H, ArH) ppm;  $^{13}\text{C}$  NMR (100 MHz,  $\text{CDCl}_3$ )  $\delta$  = 32.1, 33.4, 51.9, 52.7, 109.8, 110.3, 110.5, 115.7, 117.6, 119.7, 119.8, 120.1, 120.9, 121.4, 121.6, 121.8, 123.5, 124.8, 124.9, 129.2, 131.6, 132.0, 135.9, 136.0, 136.3, 138.5, 140.0, 143.6, 163.5, 166.6 ppm; HRMS (ESI)  $m/z$ : calcd. for  $\text{C}_{30}\text{H}_{23}\text{N}_5\text{O}_4$   $[\text{M} + \text{H}^+]$ : 518.1828, found: 518.1825.

**Methyl 11-ethyl-3-(9-ethyl-3-(methoxycarbonyl)-9H-pyrido[3,4-*b*]indol-1-yl)-11H-imidazo[1',5':1,2]pyrido[3,4-*b*]indole-5-carboxylate (4b).** Yield: 85% (0.33 g from 0.20 g) as a yellow solid; m.p. >250 °C;  $R_f$  = 0.32 (hexane/EtOAc, 60:40, v/v); IR (neat):  $\nu_{\max}$  ( $\text{cm}^{-1}$ ) = 1711 ( $\text{CO}_2\text{CH}_3$ );  $^1\text{H}$  NMR (400 MHz,  $\text{CDCl}_3$ )  $\delta$  = 1.23 (t,  $J$  = 7.2 Hz, 3 H,  $\text{NCH}_2\text{CH}_3$ ), 1.61 (t,  $J$  = 7.2 Hz, 3 H,  $\text{NCH}_2\text{CH}_3$ ), 3.28 (s, 3 H,  $\text{CO}_2\text{CH}_3$ ), 4.00 (s, 3 H,  $\text{CO}_2\text{CH}_3$ ), 4.50 (q,  $J$  = 7.2 Hz, 1 H,  $\text{NCHHCH}_3$ ), 4.71 (q,  $J$  = 7.2 Hz, 2 H,  $\text{NCH}_2\text{CH}_3$ ), 5.23 (q,  $J$  = 7.2 Hz, 1 H,  $\text{NCHHCH}_3$ ), 7.34–7.42 (m, 2 H, ArH), 7.49 (t,  $J$  = 7.5 Hz, 1 H, ArH), 7.56–7.62 (m, 2 H, ArH), 7.68 (d,  $J$  = 4.6 Hz, 1 H, ArH), 8.00 (d,  $J$  = 7.8 Hz, 1 H, ArH), 8.10 (d,  $J$  = 6.4 Hz, 2 H, ArH), 8.27 (d,  $J$  = 7.7 Hz, 1 H, ArH), 8.91 (s, 1 H, ArH) ppm;  $^{13}\text{C}$

NMR (150 MHz, CDCl<sub>3</sub>)  $\delta$  = 14.8, 15.0, 40.3, 41.2, 53.0, 53.1, 110.1, 114.1, 117.0, 117.7, 120.5, 121.2, 121.9, 122.1, 122.9, 123.0, 125.6, 126.5, 127.8, 129.8, 130.0, 131.3, 132.1, 134.2, 134.4, 134.8, 137.0, 139.5, 142.0, 143.7, 161.7, 165.2 ppm; HRMS (ESI)  $m/z$ : calcd. for C<sub>32</sub>H<sub>27</sub>N<sub>5</sub>O<sub>4</sub> [M + H<sup>+</sup>]: 546.2141, found: 546.2137.

**Methyl 3-(3-(methoxycarbonyl)-9-propyl-9H-pyrido[3,4-*b*]indol-1-yl)-11-propyl-11H-imidazo[1',5':1,2]pyrido[3,4-*b*]indole-5-carboxylate (4c).** Yield: 88% (0.34 g from 0.20 g) as a yellow solid; m.p. 202–204 °C;  $R_f$  = 0.38 (hexane/EtOAc, 60:40, v/v); IR (neat):  $\nu_{\max}$  (cm<sup>-1</sup>) = 1712 (CO<sub>2</sub>CH<sub>3</sub>); <sup>1</sup>H NMR (400 MHz, CDCl<sub>3</sub>)  $\delta$  = 0.65 (t,  $J$  = 7.4 Hz, 3 H, NCH<sub>2</sub>CH<sub>2</sub>CH<sub>3</sub>), 1.08 (t,  $J$  = 7.4 Hz, 3 H, NCH<sub>2</sub>CH<sub>2</sub>CH<sub>3</sub>), 1.56–1.61 (m, 1 H, NCH<sub>2</sub>CHHCH<sub>3</sub>), 1.71–1.75 (m, 1 H, NCH<sub>2</sub>CHHCH<sub>3</sub>), 2.01–2.07 (m, 2 H, NCH<sub>2</sub>CH<sub>2</sub>CH<sub>3</sub>), 3.24 (s, 3 H, CO<sub>2</sub>CH<sub>3</sub>), 4.00 (s, 3 H, CO<sub>2</sub>CH<sub>3</sub>), 4.29–4.36 (m, 1 H, NCHHCH<sub>2</sub>CH<sub>3</sub>), 4.57 (q,  $J$  = 6.8 Hz, 2 H, NCH<sub>2</sub>CH<sub>2</sub>CH<sub>3</sub>), 5.18–5.25 (m, 1 H, NCHHCH<sub>2</sub>CH<sub>3</sub>), 7.32 (d,  $J$  = 7.4 Hz, 1 H, ArH), 7.39 (d,  $J$  = 7.5 Hz, 1 H, ArH), 7.45 (d,  $J$  = 7.8 Hz, 1 H, ArH), 7.54–7.60 (m, 2 H, ArH), 7.66 (t,  $J$  = 7.5 Hz, 1 H, ArH), 7.96 (d,  $J$  = 7.7 Hz, 1 H, ArH), 8.04 (s, 1 H, ArH), 8.06 (s, 1 H, ArH), 8.25 (d,  $J$  = 7.8 Hz, 1 H, ArH), 8.91 (s, 1 H, ArH) ppm; <sup>13</sup>C NMR (100 MHz, CDCl<sub>3</sub>)  $\delta$  = 11.5, 11.6, 22.4, 23.4, 46.8, 46.9, 51.8, 52.7, 110.0, 110.5, 110.8, 115.6, 117.6, 119.5, 119.7, 120.4, 120.8, 121.3, 121.6, 121.7, 123.5, 124.7, 124.8, 129.1, 131.2, 131.9, 135.6, 136.2, 138.3, 139.6, 143.0, 163.5, 166.5 ppm; HRMS (ESI)  $m/z$ : calcd. for C<sub>34</sub>H<sub>31</sub>N<sub>5</sub>O<sub>4</sub> [M + H<sup>+</sup>]: 574.2454, found: 574.2451.

**Methyl 11-benzyl-3-(9-benzyl-3-(methoxycarbonyl)-9H-pyrido[3,4-*b*]indol-1-yl)-11H-imidazo[1',5':1,2]pyrido[3,4-*b*]indole-5-carboxylate (4d).** Yield: 72% (0.28 g from 0.20 g) as a yellow solid; m.p. 163–165 °C;  $R_f$  = 0.50 (hexane/EtOAc, 60:40, v/v); IR (neat):  $\nu_{\max}$  (cm<sup>-1</sup>) = 1710 (CO<sub>2</sub>CH<sub>3</sub>); <sup>1</sup>H NMR (400 MHz, CDCl<sub>3</sub>)  $\delta$  = 3.03 (s, 3 H, CO<sub>2</sub>CH<sub>3</sub>), 4.00 (s, 3 H, CO<sub>2</sub>CH<sub>3</sub>), 5.43–5.67 (m, 2 H, CH<sub>2</sub>Ph), 5.88 (d,  $J$  = 5.1 Hz, 2 H, CH<sub>2</sub>Ph), 6.69–6.71 (m, 1 H, ArH), 6.76 (d,  $J$  = 7.4 Hz, 2 H, ArH), 6.92 (dd,  $J_1$  = 13.0 Hz,  $J_2$  = 5.3 Hz, 3 H, ArH), 7.15 (d,  $J$  = 7.6 Hz, 2 H, ArH), 7.31 (d,  $J$  = 7.4 Hz, 2 H, ArH), 7.39 (d,  $J$  = 9.7 Hz, 2 H, ArH), 7.43–7.47 (m, 1 H, ArH), 7.50–7.56 (m, 3 H, ArH), 7.63 (d,  $J$  = 7.6 Hz, 1 H, ArH), 7.85 (s, 1 H, ArH), 8.02 (d,  $J$  = 7.4 Hz, 1 H, ArH), 8.28 (d,  $J$  = 7.9 Hz, 1 H, ArH), 8.92 (s, 1 H, ArH) ppm; <sup>13</sup>C NMR (150 MHz, CDCl<sub>3</sub>)  $\delta$  = 48.7, 48.9, 51.5, 52.7, 110.1, 110.9, 111.3, 115.7, 117.4, 119.8, 120.9, 121.2, 121.7, 121.8, 123.6, 124.6, 125.2, 126.1, 126.7, 127.2, 128.0, 128.2, 128.6, 129.3, 129.4, 131.5, 132.1, 135.2, 136.1, 137.5, 139.9, 143.3, 163.0, 166.4 ppm; HRMS (ESI)  $m/z$ : calcd. for C<sub>42</sub>H<sub>31</sub>N<sub>5</sub>O<sub>4</sub> [M + H<sup>+</sup>]: 670.2454, found: 670.2464.

**Methyl 11-allyl-3-(9-allyl-3-(methoxycarbonyl)-9H-pyrido[3,4-*b*]indol-1-yl)-11H-imidazo[1',5':1,2]pyrido[3,4-*b*]indole-5-carboxylate (4e).** Yield: 75% (0.29 g from 0.20 g) as an orange red solid; m.p. 207–209 °C;  $R_f$  = 0.40 (hexane/EtOAc, 60:40, v/v); IR (neat):  $\nu_{\max}$  (cm<sup>-1</sup>) = 1709 (CO<sub>2</sub>CH<sub>3</sub>); <sup>1</sup>H NMR (400 MHz, CDCl<sub>3</sub>)  $\delta$  = 3.28 (s, 3 H, CO<sub>2</sub>CH<sub>3</sub>), 4.01 (s, 3 H, CO<sub>2</sub>CH<sub>3</sub>), 4.83–4.94 (m, 3 H, NCH<sub>2</sub> and =CHH), 4.99 (d,  $J$  = 17.4 Hz, 1 H, =CHH), 5.28 (d,  $J$  = 9.8 Hz, 3 H, NCH<sub>2</sub> and =CHH), 5.83–5.90 (m, 2 H, =CHH and CH<sub>2</sub>CH), 6.14–6.20 (m, 1 H, CH<sub>2</sub>CH), 7.37–7.42 (m, 2 H, ArH), 7.45–7.50 (m, 2 H, ArH), 7.59 (d,  $J$  = 8.3 Hz, 1 H, ArH), 7.66 (t,  $J$  = 7.6 Hz, 1 H, ArH), 8.00 (d,

$J = 7.8$  Hz, 1 H, ArH), 8.03 (s, 1 H, ArH), 8.09 (s, 1 H, ArH), 8.27 (d,  $J = 7.9$  Hz, 1 H, ArH), 8.92 (s, 1 H, ArH) ppm;  $^{13}\text{C}$  NMR (150 MHz,  $\text{CDCl}_3$ )  $\delta = 47.3, 48.0, 51.8, 52.7, 110.0, 110.7, 111.2, 115.6, 117.0, 117.5, 117.7, 119.7, 119.9, 120.7, 121.1, 121.6, 121.7, 121.9, 123.6, 124.5, 125.0, 129.2, 131.4, 131.6, 132.0, 133.2, 135.2, 136.0, 139.6, 142.9, 163.4, 166.5$  ppm; HRMS (ESI)  $m/z$ : calcd. for  $\text{C}_{34}\text{H}_{27}\text{N}_5\text{O}_4$  [ $\text{M} + \text{H}^+$ ]: 570.2063, found: 570.2088.

**Methyl 3-(3-(methoxycarbonyl)-9-(prop-2-yn-1-yl)-9H-pyrido[3,4-*b*]indol-1-yl)-11-(prop-2-yn-1-yl)-11H-imidazo[1',5':1,2]pyrido[3,4-*b*]indole-5-carboxylate (4f).** Yield: 57% (0.22 g from 0.20 g) as an orange red solid; m.p. 188-190 °C;  $R_f = 0.40$  (hexane/EtOAc, 60:40, v/v); IR (neat):  $\nu_{\text{max}}$  ( $\text{cm}^{-1}$ ) = 1714 ( $\text{CO}_2\text{CH}_3$ );  $^1\text{H}$  NMR (500 MHz,  $\text{CDCl}_3$ )  $\delta = 2.05$  (d,  $J = 2.6$  Hz, 1 H,  $\text{C}\equiv\text{CH}$ ), 2.42 (t,  $J = 2.3$  Hz, 1 H,  $\text{C}\equiv\text{CH}$ ), 3.24 (s, 3 H,  $\text{CO}_2\text{CH}_3$ ), 4.02 (s, 3 H,  $\text{CO}_2\text{CH}_3$ ), 5.30–5.37 (m, 3 H, NCHH and  $\text{NCH}_2$ ), 6.10 (d,  $J = 15.5$  Hz, 1 H, NCHH), 7.39 (t,  $J = 7.5$  Hz, 1 H, ArH), 7.43–7.46 (m, 1 H, ArH), 7.52 (t,  $J = 7.4$  Hz, 1 H, ArH), 7.62 (d,  $J = 8.2$  Hz, 1 H, ArH), 7.71 (t,  $J = 2.6$  Hz, 2 H, ArH), 7.99 (d,  $J = 8.3$  Hz, 1 H, ArH), 8.08 (s, 1 H, ArH), 8.27 (t,  $J = 3.9$  Hz, 2 H, ArH), 8.90 (s, 1 H, ArH) ppm;  $^{13}\text{C}$  NMR (100 MHz,  $\text{CDCl}_3$ )  $\delta$  = spectra could not be recorded due to solubility problem in  $\text{CDCl}_3$  &  $\text{DMSO}-d_6$ ; MS (ES):  $m/z$  (%) = 566.0 (100) [ $\text{M}+1$ ] $^+$ ;  $\text{C}_{34}\text{H}_{23}\text{N}_5\text{O}_4$  (565.1750): calcd. for C 72.20, H 4.10, N 12.38; found for C 72.29, H 4.12, N 12.42. HRMS (ESI)  $m/z$ : calcd. for  $\text{C}_{34}\text{H}_{23}\text{N}_5\text{O}_4$  [ $\text{M} + \text{H}^+$ ]: 566.1828, found: 566.1827.

**Methyl 11-(2-ethoxy-2-oxoethyl)-3-(9-(2-ethoxy-2-oxoethyl)-3-(methoxycarbonyl)-9H-pyrido[3,4-*b*]indol-1-yl)-11H-imidazo[1',5':1,2]pyrido[3,4-*b*]indole-5-carboxylate (4g).** Yield: 82% (0.32 g from 0.20 g) as an orange red solid; m.p. 237-239 °C;  $R_f = 0.35$  (hexane/EtOAc, 60:40, v/v); IR (neat):  $\nu_{\text{max}}$  ( $\text{cm}^{-1}$ ) = 1726 ( $\text{CO}_2\text{CH}_2\text{CH}_3$ ), 1713 ( $\text{CO}_2\text{CH}_3$ );  $^1\text{H}$  NMR (400 MHz,  $\text{CDCl}_3$ )  $\delta = 1.25$  (t,  $J = 7.1$  Hz, 6 H, 2 x  $\text{CO}_2\text{CH}_2\text{CH}_3$ ), 3.23 (s, 3 H,  $\text{CO}_2\text{CH}_3$ ), 4.02 (s, 3 H,  $\text{CO}_2\text{CH}_3$ ), 4.05 (s, 1 H, NCHH), 4.08 (s, 2 H,  $\text{NCH}_2$ ), 4.13 (s, 1 H, NCHH), 5.21–5.40 (m, 4 H, 2 x  $\text{CO}_2\text{CH}_2\text{CH}_3$ ), 7.38 (t,  $J = 6.4$  Hz, 1 H, ArH), 7.44–7.49 (m, 3 H, ArH), 7.67 (t,  $J = 7.4$  Hz, 2 H, ArH), 7.99 (s, 1 H, ArH), 7.92 (s, 1 H, ArH), 8.27 (d,  $J = 7.7$  Hz, 2 H, ArH), 8.91 (s, 1 H, ArH) ppm;  $^{13}\text{C}$  NMR (150 MHz,  $\text{CDCl}_3$ )  $\delta = 14.1, 14.3, 46.9, 47.6, 51.7, 52.8, 61.5, 62.4, 109.6, 110.4, 111.5, 115.6, 117.5, 119.1, 119.9, 121.6, 121.9, 122.0, 123.6, 124.8, 125.4, 129.6, 131.4, 132.4, 135.2, 136.6, 138.2, 139.8, 143.4, 163.2, 166.2, 167.7, 168.5$  ppm; HRMS (ESI)  $m/z$ : calcd. for  $\text{C}_{36}\text{H}_{31}\text{N}_5\text{O}_8$  [ $\text{M} + \text{H}^+$ ]: 662.2251, found: 662.2243.

**Ethyl 3-(3-(ethoxycarbonyl)-9-methyl-9H-pyrido[3,4-*b*]indol-1-yl)-11-methyl-11H-imidazo[1',5':1,2]pyrido[3,4-*b*]indole-5-carboxylate (4h).** Yield: 90% (0.35 g from 0.20 g) as a yellow solid; m.p. >250 °C;  $R_f = 0.35$  (hexane/EtOAc, 60:40, v/v); IR (neat):  $\nu_{\text{max}}$  ( $\text{cm}^{-1}$ ) = 1711 ( $\text{CO}_2\text{CH}_2\text{CH}_3$ );  $^1\text{H}$  NMR (400 MHz,  $\text{CDCl}_3$ )  $\delta = 0.96$  (t,  $J = 7.1$  Hz, 3 H,  $\text{CO}_2\text{CH}_2\text{CH}_3$ ), 1.46 (t,  $J = 7.1$  Hz, 3 H,  $\text{CO}_2\text{CH}_2\text{CH}_3$ ), 3.77 (q,  $J = 7.1$  Hz, 2 H,  $\text{CO}_2\text{CH}_2\text{CH}_3$ ), 4.00 (s, 3 H,  $\text{NCH}_3$ ), 4.22 (s, 3 H,  $\text{NCH}_3$ ), 4.38–4.56 (m, 2 H,  $\text{CO}_2\text{CH}_2\text{CH}_3$ ), 7.35 (t,  $J = 7.3$  Hz, 1 H, ArH), 7.39 (t,  $J = 7.6$  Hz, 1 H, ArH), 7.48 (t,  $J = 7.7$  Hz, 1 H, ArH), 7.55 (d,  $J_1 = 8.3$  Hz,  $J_2 = 2.8$  Hz, 2 H, ArH), 7.66 (d,  $J = 7.3$  Hz, 1 H, ArH), 7.97 (d,  $J = 7.8$  Hz, 1 H, ArH), 8.02 (s, 1 H, ArH), 8.17 (s, 1 H, ArH), 8.25 (d,  $J = 7.8$  Hz, 1 H, ArH), 8.88

(s, 1 H, ArH) ppm;  $^{13}\text{C}$  NMR (100 MHz,  $\text{CDCl}_3$ )  $\delta$  = 13.9, 14.6, 32.0, 33.3, 61.3, 61.5, 109.8, 110.3, 110.5, 115.6, 117.4, 119.7, 120.5, 120.8, 121.3, 121.6, 121.7, 123.5, 124.8, 124.9, 129.1, 131.5, 131.9, 135.9, 136.2, 136.5, 138.7, 139.9, 143.6, 163.1, 165.9 ppm; HRMS (ESI)  $m/z$ : calcd. for  $\text{C}_{32}\text{H}_{27}\text{N}_5\text{O}_4$  [ $\text{M} + \text{H}^+$ ]: 546.2141, found: 546.2110.

**Ethyl 3-(3-(ethoxycarbonyl)-9-ethyl-9H-pyrido[3,4-*b*]indol-1-yl)-11-ethyl-11H-imidazo[1',5':1,2]pyrido[3,4-*b*]indole-5-carboxylate (4i).** Yield: 80% (0.31 g from 0.20 g) as a yellow solid; m.p. 200-202 °C;  $R_f$  = 0.40 (hexane/EtOAc, 60:40, v/v); IR (neat):  $\nu_{\text{max}}$  ( $\text{cm}^{-1}$ ) = 1712 ( $\text{CO}_2\text{CH}_2\text{CH}_3$ );  $^1\text{H}$  NMR (400 MHz,  $\text{CDCl}_3$ )  $\delta$  = 0.98 (t,  $J$  = 7.0 Hz, 3 H,  $\text{NCH}_2\text{CH}_3$ ), 1.26 (t,  $J$  = 7.1 Hz, 3 H,  $\text{NCH}_2\text{CH}_3$ ), 1.46 (t,  $J$  = 7.1 Hz, 3 H,  $\text{CO}_2\text{CH}_2\text{CH}_3$ ), 1.63 (t,  $J$  = 7.2 Hz, 3 H,  $\text{CO}_2\text{CH}_2\text{CH}_3$ ), 3.66 (q,  $J$  = 7.1 Hz, 1 H,  $\text{NCHHCH}_3$ ), 3.84 (q,  $J$  = 7.1 Hz, 1 H,  $\text{NCHHCH}_3$ ), 4.39 (q,  $J$  = 7.0 Hz, 1 H,  $\text{NCHHCH}_3$ ), 4.51 (q,  $J$  = 7.1 Hz, 2 H,  $\text{CO}_2\text{CH}_2\text{CH}_3$ ), 4.71 (q,  $J$  = 7.1 Hz, 2 H,  $\text{CO}_2\text{CH}_2\text{CH}_3$ ), 5.23 (q,  $J$  = 7.1 Hz, 1 H,  $\text{NCHHCH}_3$ ), 7.34–7.41 (m, 2 H, ArH), 7.48 (t,  $J$  = 7.3 Hz, 1 H, ArH), 7.56–7.61 (m, 2 H, ArH), 7.67 (t,  $J$  = 7.6 Hz, 1 H, ArH), 8.02 (d,  $J$  = 7.8 Hz, 1 H, ArH), 8.08 (s, 1 H, ArH), 8.11 (s, 1 H, ArH), 8.27 (d,  $J$  = 7.8 Hz, 1 H, ArH), 8.89 (s, 1 H, ArH) ppm;  $^{13}\text{C}$  NMR (150 MHz,  $\text{CDCl}_3$ )  $\delta$  = 14.0, 14.2, 14.6, 15.1, 40.1, 40.2, 61.2, 61.5, 109.7, 110.6, 115.5, 117.4, 119.4, 119.8, 120.7, 120.8, 121.3, 121.8, 122.0, 123.7, 124.5, 124.8, 129.0, 130.8, 132.0, 134.9, 136.1, 136.2, 138.8, 139.0, 142.6, 163.0, 165.9 ppm; HRMS (ESI)  $m/z$ : calcd. for  $\text{C}_{34}\text{H}_{31}\text{N}_5\text{O}_4$  [ $\text{M} + \text{H}^+$ ]: 574.2454, found: 574.2502.

**Isopropyl 3-(3-(isopropoxycarbonyl)-9-methyl-9H-pyrido[3,4-*b*]indol-1-yl)-11-methyl-11H-imidazo[1',5':1,2]pyrido[3,4-*b*]indole-5-carboxylate (4j).** Yield: 85% (0.33 g from 0.20 g) as a yellow solid; m.p. >250 °C;  $R_f$  = 0.45 (hexane/EtOAc, 60:40, v/v); IR (neat):  $\nu_{\text{max}}$  ( $\text{cm}^{-1}$ ) = 1710 ( $\text{CO}_2i\text{-Pr}$ );  $^1\text{H}$  NMR (400 MHz,  $\text{CDCl}_3$ )  $\delta$  = 0.98 (d,  $J$  = 5.6 Hz, 3 H,  $\text{CO}_2\text{CH}(\text{CH}_3)_2$ ), 1.08 (d,  $J$  = 5.6 Hz, 3 H,  $\text{CO}_2\text{CH}(\text{CH}_3)_2$ ), 1.41 (d,  $J$  = 6.2 Hz, 3 H,  $\text{CO}_2\text{CH}(\text{CH}_3)_2$ ), 1.43 (d,  $J$  = 6.2 Hz, 3 H,  $\text{CO}_2\text{CH}(\text{CH}_3)_2$ ), 4.00 (s, 3 H,  $\text{NCH}_3$ ), 4.26 (s, 3 H,  $\text{NCH}_3$ ), 4.58–4.65 (m, 1 H,  $\text{CO}_2\text{CH}$ ), 5.27–5.33 (m, 1 H,  $\text{CO}_2\text{CH}$ ), 7.33–7.38 (m, 2 H, ArH), 7.48 (t,  $J$  = 7.6 Hz, 1 H, ArH), 7.56 (d,  $J$  = 8.3 Hz, 2 H, ArH), 7.67 (t,  $J$  = 7.5 Hz, 1 H, ArH), 8.01 (d,  $J$  = 6.2 Hz, 2 H, ArH), 8.18 (s, 1 H, ArH), 8.26 (d,  $J$  = 7.8 Hz, 1 H, ArH), 8.83 (s, 1 H, ArH) ppm;  $^{13}\text{C}$  NMR (150 MHz,  $\text{CDCl}_3$ )  $\delta$  = 21.4, 21.6, 22.2, 32.0, 33.1, 68.8, 69.1, 109.9, 110.2, 110.5, 115.6, 117.4, 119.5, 119.7, 120.7, 121.3, 121.7, 121.8, 123.5, 124.7, 129.0, 131.4, 131.8, 135.9, 136.5, 136.7, 139.0, 139.9, 143.6, 162.5, 165.2 ppm; HRMS (ESI)  $m/z$ : calcd. for  $\text{C}_{34}\text{H}_{31}\text{N}_5\text{O}_4$  [ $\text{M} + \text{H}^+$ ]: 574.2454, found: 574.2452.

**11-methyl-3-(9-methyl-9H-pyrido[3,4-*b*]indol-1-yl)-11H-imidazo[1',5':1,2]pyrido[3,4-*b*]indole (4k).** Yield: 91% (0.052 g from 0.030 g) as a yellow solid; m.p. 202-204 °C;  $R_f$  = 0.35 (hexane/EtOAc, 70:30, v/v);  $^1\text{H}$  NMR (400 MHz,  $\text{CDCl}_3$ )  $\delta$  = 3.66 (s, 3 H,  $\text{NCH}_3$ ), 4.23 (s, 3 H,  $\text{NCH}_3$ ), 7.27–7.37 (m, 3 H, ArH), 7.43–7.52 (m, 3 H, ArH), 7.63 (t,  $J$  = 7.5 Hz, 1 H, ArH), 7.95 (d,  $J$  = 7.7 Hz, 1 H, ArH), 8.04 (s, 1 H, ArH), 8.08 (d,  $J$  = 4.4 Hz, 1 H, ArH), 8.19 (d,  $J$  = 7.6 Hz, 1 H, ArH), 8.40 (d,  $J$  = 7.1 Hz, 1 H, ArH), 8.62 (d,  $J$  = 4.2 Hz, 1 H, ArH) ppm;  $^{13}\text{C}$  NMR (100 MHz,  $\text{CDCl}_3$ )  $\delta$  = 31.8, 32.7, 107.9, 109.4, 110.1, 110.7, 115.0, 116.2, 117.5, 119.5, 120.1, 120.4, 121.1, 121.6,

123.1, 124.1, 128.9, 129.7, 131.4, 133.6, 136.2, 136.5, 138.4, 139.3, 143.2 ppm; HRMS (ESI)  $m/z$ : calcd. for  $C_{26}H_{19}N_5$  [ $M + H^+$ ]: 402.1719, found: 402.1733.

**11-ethyl-3-(9-ethyl-9H-pyrido[3,4-*b*]indol-1-yl)-11H-imidazo[1',5':1,2]pyrido[3,4-*b*]indole (4I).**

Yield: 90% (0.103 g from 0.06 g) as a yellow solid; m.p. 166-168 °C;  $R_f$  = 0.40 (hexane/EtOAc, 70:30, v/v);  $^1H$  NMR (400 MHz,  $CDCl_3$ )  $\delta$  = 0.95 (t,  $J$  = 7.1 Hz, 3 H,  $NCH_2CH_3$ ), 1.62 (t,  $J$  = 7.2 Hz, 3 H,  $NCH_2CH_3$ ), 4.38 (q,  $J$  = 7.1 Hz, 2 H,  $NCH_2CH_3$ ), 4.69 (q,  $J$  = 7.2 Hz, 2 H,  $NCH_2CH_3$ ), 7.29 (d,  $J$  = 6.7 Hz, 3 H, ArH), 7.45 (d,  $J$  = 6.5 Hz, 1 H, ArH), 7.52 (dd,  $J_1$  = 18.9 Hz,  $J_2$  = 7.6 Hz, 2 H, ArH), 7.62 (d,  $J$  = 8.1 Hz, 1 H, ArH), 7.97 (d,  $J$  = 7.9 Hz, 2 H, ArH), 8.12 (s, 1 H, ArH), 8.21–8.26 (m, 2 H, ArH), 8.64 (s, 1 H, ArH) ppm;  $^{13}C$  NMR (100 MHz,  $CDCl_3$ )  $\delta$  = 13.8, 15.3, 39.6, 40.0, 107.9, 109.3, 110.2, 110.9, 115.2, 116.0, 117.2, 119.6, 120.1, 120.4, 121.4, 121.7, 123.4, 123.6, 124.1, 128.7, 128.8, 131.7, 133.4, 135.2, 136.7, 138.4, 142.1 ppm; HRMS (ESI)  $m/z$ : calcd. for  $C_{28}H_{23}N_5$  [ $M + H^+$ ]: 430.3032, found: 430.3009.

**General procedure for the synthesis of compounds 1aA-aC, 1fB, 1aE-aH, 1bE, 1dE, 1fE, 1fI, DD, DE, DG, JJ, 2aK and 2DK as exemplified for methyl 11-methyl-3-propyl-11H-imidazo[1',5':1,2]pyrido[3,4-*b*]indole-5-carboxylate (1aG):** To a stirred solution of *n*-butyraldehyde (**G**) (0.13 mL, 1.49 mmol) and ammonium acetate (0.144 g, 1.86 mmol) in acetic acid, methyl 1-formyl-9-methyl-9H-pyrido[3,4-*b*]indole-3-carboxylate **1a** (0.20 g, 0.746 mmol) was added at room temperature and the reaction was continued for 2 h. After the completion of reaction as monitored by TLC, the excess of acetic acid was evaporated under reduced pressure. The crude product was purified through silica gel (60-120 mesh) column chromatography by using hexane: ethyl acetate (80:20, v/v) as an eluent to obtain **1aG** as the yellow solid (0.17 g, 71%;  $R_f$  = 0.35 (hexane/EtOAc, 70:30, v/v)).

**Methyl 11-methyl-3-phenyl-11H-imidazo[1',5':1,2]pyrido[3,4-*b*]indole-5-carboxylate (1aA).**<sup>Ref.</sup>

<sup>2</sup> Yield: 49% (0.13 g from 0.20 g) as a pale yellow solid; m.p. 147-149 °C (Reported m. p. 148-149 °C);  $R_f$  = 0.35 (hexane/EtOAc, 70:30, v/v); IR (neat):  $\nu_{max}$  ( $cm^{-1}$ ) = 1712 ( $CO_2CH_3$ );  $^1H$  NMR (400 MHz,  $CDCl_3$ )  $\delta$  = 3.25 (s, 3 H,  $NCH_3$ ), 4.22 (s, 3 H,  $CO_2CH_3$ ), 7.34 (t,  $J$  = 7.6 Hz, 1 H, ArH), 7.41 (d,  $J$  = 7.4 Hz, 1 H, ArH), 7.47–7.53 (m, 4 H, ArH), 7.67 (d,  $J$  = 7.2 Hz, 2 H, ArH), 7.93 (s, 1 H, ArH), 7.96 (s, 1 H, ArH), 8.09 (s, 1 H, ArH) ppm;  $^{13}C$  NMR (100 MHz,  $CDCl_3$ )  $\delta$  = 31.8, 51.6, 109.2, 109.6, 116.8, 119.3, 119.4, 119.9, 121.4, 123.3, 124.3, 124.6, 126.1, 128.6, 128.8, 132.3, 133.3, 139.7, 142.8, 163.4 ppm; HRMS (ESI)  $m/z$ : calcd. for  $C_{22}H_{17}N_3O_2$  [ $M + H^+$ ]: 356.1321, found: 356.1178.

**Methyl 3-(2-hydroxyphenyl)-11-methyl-11H-imidazo[1',5':1,2]pyrido[3,4-*b*]indole-5-carboxylate (1aB).** Yield: 61% (0.17 g from 0.20 g) as a yellow solid; m.p. >250 °C;  $R_f$  = 0.30 (hexane/EtOAc, 70:30, v/v); IR (neat):  $\nu_{max}$  ( $cm^{-1}$ ) = 3028 (OH), 1710 ( $CO_2CH_3$ );  $^1H$  NMR (600 MHz,  $CDCl_3$ )  $\delta$  = 3.40 (s, 3 H,  $CO_2CH_3$ ), 4.18 (s, 3 H,  $NCH_3$ ), 6.91 (t,  $J$  = 7.4 Hz, 1 H, ArH), 7.17 (d,  $J$  = 8.1 Hz, 1 H, ArH), 7.26–7.29 (m, 1 H, ArH), 7.35 (t,  $J$  = 7.0 Hz, 1 H, ArH), 7.37 (d,  $J$  = 7.7 Hz, 1 H, ArH), 7.47 (t,  $J$  = 7.6 Hz, 1 H, ArH), 7.50 (d,  $J$  = 8.2 Hz, 1 H, ArH), 7.93 (d,  $J$  = 7.7 Hz, 1 H, ArH),



8.04 (s, 1 H, ArH), 8.05 (s, 1 H, ArH) ppm;  $^{13}\text{C}$  NMR (150 MHz,  $\text{CDCl}_3$ )  $\delta$  = 32.1, 52.2, 109.8, 109.9, 117.2, 117.7, 118.0, 118.5, 119.1, 119.6, 120.1, 121.8, 123.5, 123.8, 124.0, 125.0, 130.2, 132.5, 139.9, 154.9, 163.4 ppm; HRMS (ESI)  $m/z$ : calcd. for  $\text{C}_{22}\text{H}_{17}\text{N}_3\text{O}_3$  [ $\text{M} + \text{H}^+$ ]: 372.1348, found: 372.1308.

**Methyl 3-(4-fluorophenyl)-11-methyl-11H-imidazo[1',5':1,2]pyrido[3,4-*b*]indole-5-carboxylate (1aC).**<sup>Ref. 2</sup> Yield: 50% (0.14 g from 0.20 g) as a pale yellow solid; m.p. 112–114 °C (Reported m.p. 111–112 °C);  $R_f$  = 0.40 (hexane/EtOAc, 70:30, v/v); IR (neat):  $\nu_{\text{max}}$  ( $\text{cm}^{-1}$ ) = 1711 ( $\text{CO}_2\text{CH}_3$ ); The similar  $^1\text{H}$  and  $^{13}\text{C}$ -NMR spectrum was obtained as reported in Ref 17. MS (ES):  $m/z$  (%) = 374.2 (100) [ $\text{M}+1$ ] $^+$ ;  $\text{C}_{22}\text{H}_{16}\text{FN}_3\text{O}_2$  (373.1227).

**Methyl 3-(2-hydroxyphenyl)-11-(prop-2-yn-1-yl)-11H-imidazo[1',5':1,2]pyrido[3,4-*b*]indole-5-carboxylate (1fB).** Yield: 67% (0.18 g from 0.20 g) as a yellow solid; m.p. 186–188 °C;  $R_f$  = 0.35 (hexane/EtOAc, 70:30, v/v); IR (neat):  $\nu_{\text{max}}$  ( $\text{cm}^{-1}$ ) = 3271 (OH), 1711 ( $\text{CO}_2\text{CH}_3$ );  $^1\text{H}$  NMR (600 MHz,  $\text{CDCl}_3$ )  $\delta$  = 2.43 (s, 1 H,  $\text{C}\equiv\text{CH}$ ), 3.40 (s, 3 H,  $\text{CO}_2\text{CH}_3$ ), 5.30 (s, 2 H,  $\text{NCH}_2$ ), 6.92 (t,  $J$  = 7.4 Hz, 1 H, ArH), 7.17 (d,  $J$  = 8.2 Hz, 1 H, ArH), 7.28 (d,  $J$  = 5.2 Hz, 1 H, ArH), 7.39 (d,  $J$  = 7.4 Hz, 2 H, ArH), 7.50 (t,  $J$  = 7.5 Hz, 1 H, ArH), 7.58 (d,  $J$  = 8.3 Hz, 1 H, ArH), 7.96 (d,  $J$  = 7.6 Hz, 1 H, ArH), 8.05 (s, 1 H, ArH), 8.15 (s, 1 H, ArH) ppm;  $^{13}\text{C}$  NMR (150 MHz,  $\text{CDCl}_3$ )  $\delta$  = 34.8, 52.2, 74.6, 76.7, 109.8, 110.6, 117.1, 117.6, 117.7, 119.1, 119.8, 120.9, 122.3, 123.4, 123.7, 123.8, 125.4, 130.2, 131.6, 139.0, 141.3, 154.9, 163.3 ppm; HRMS (ESI)  $m/z$ : calcd. for  $\text{C}_{24}\text{H}_{17}\text{N}_3\text{O}_3$  [ $\text{M} + \text{H}^+$ ]: 396.1348, found: 396.1344.

**Methyl 11-methyl-11H-imidazo[1',5':1,2]pyrido[3,4-*b*]indole-5-carboxylate (1aE).**<sup>Ref. 2</sup> Yield: 48% (0.10 g from 0.20 g) as a light yellow solid; m.p. 178–180 °C (Reported m.p. 177–178 °C);  $R_f$  = 0.20 (hexane/EtOAc, 70:30, v/v); IR (neat):  $\nu_{\text{max}}$  ( $\text{cm}^{-1}$ ) = 1708 ( $\text{CO}_2\text{CH}_3$ );  $^1\text{H}$  NMR (400 MHz,  $\text{CDCl}_3$ )  $\delta$  = 4.03 (s, 3 H,  $\text{NCH}_3$ ), 4.11 (s, 3 H,  $\text{CO}_2\text{CH}_3$ ), 7.35 (t,  $J$  = 7.8 Hz, 1 H, ArH), 7.46–7.49 (m, 2 H, ArH), 7.94 (d,  $J$  = 7.4 Hz, 2 H, ArH), 8.29 (s, 1 H, ArH), 9.57 (s, 1 H, ArH) ppm;  $^{13}\text{C}$  NMR (100 MHz,  $\text{CDCl}_3$ )  $\delta$  = 31.5, 52.4, 108.7, 109.6, 115.8, 116.8, 118.2, 119.2, 121.4, 123.0, 124.7, 131.6, 132.6, 139.5, 162.6 ppm; HRMS (ESI)  $m/z$ : calcd. for  $\text{C}_{16}\text{H}_{13}\text{N}_3\text{O}_2$  [ $\text{M} + \text{H}^+$ ]: 280.1008, found: 280.0950.

**Methyl 3,11-dimethyl-11H-imidazo[1',5':1,2]pyrido[3,4-*b*]indole-5-carboxylate (1aF).**<sup>Ref. 2</sup> Yield: 53% (0.115 g from 0.20 g) as a light brown solid; m.p. 169–171 °C, (Reported m.p. 168–169 °C);  $R_f$  = 0.25 (hexane/ EtOAc, 70:30, v/v); IR (neat):  $\nu_{\text{max}}$  ( $\text{cm}^{-1}$ ) = 2927, 2835, 2120, 1912, 1706, 1470, 1353; The similar  $^1\text{H}$  and  $^{13}\text{C}$ -NMR spectrum was obtained as reported in Ref 17. MS (ES):  $m/z$  (%) = 294.1 (100) [ $\text{M}+1$ ] $^+$ ;  $\text{C}_{17}\text{H}_{15}\text{N}_3\text{O}_2$  (293.1164).

**Methyl 11-methyl-3-propyl-11H-imidazo[1',5':1,2]pyrido[3,4-*b*]indole-5-carboxylate (1aG).** Yield: 71% (0.17 g from 0.20 g) as a yellow solid; m.p. 95–96 °C;  $R_f$  = 0.35 (hexane/EtOAc, 70:30, v/v); IR (neat):  $\nu_{\text{max}}$  ( $\text{cm}^{-1}$ ) = 1711 ( $\text{CO}_2\text{CH}_3$ );  $^1\text{H}$  NMR (600 MHz,  $\text{CDCl}_3$ )  $\delta$  = 0.96 (s, 3 H,

CH<sub>2</sub>CH<sub>2</sub>CH<sub>3</sub>), 1.83 (d, *J* = 6.1 Hz, 2 H, CH<sub>2</sub>CH<sub>2</sub>CH<sub>3</sub>), 2.97 (s, 2 H, CH<sub>2</sub>CH<sub>2</sub>CH<sub>3</sub>), 4.03 (s, 6 H, NCH<sub>3</sub> and CO<sub>2</sub>CH<sub>3</sub>), 7.28 (s, 1 H, ArH), 7.41 (s, 2 H, ArH), 7.84 (d, *J* = 6.4 Hz, 1 H, ArH), 7.89 (s, 1 H, ArH), 7.92 (s, 1 H, ArH) ppm; <sup>13</sup>C NMR (150 MHz, CDCl<sub>3</sub>) δ = 14.1, 20.2, 31.8, 32.6, 52.7, 108.3, 109.6, 117.2, 118.3, 118.4, 119.2, 121.3, 123.4, 124.4, 132.9, 139.6, 144.5, 163.3 ppm; HRMS (ESI) *m/z*: calcd. for C<sub>19</sub>H<sub>19</sub>N<sub>3</sub>O<sub>2</sub> [M + H<sup>+</sup>]: 322.1556, found: 322.1557.

**Methyl 3-isopropyl-11-methyl-11*H*-imidazo[1',5':1,2]pyrido[3,4-*b*]indole-5-carboxylate (1aH).**<sup>Ref 2</sup> Yield: 54% (0.13 g from 0.20 g) as a pale yellow solid; m.p. 124-126 °C; *R<sub>f</sub>* = 0.50 (hexane/EtOAc, 70:30, v/v); IR (neat): ν<sub>max</sub> (cm<sup>-1</sup>) = 1703 (CO<sub>2</sub>CH<sub>3</sub>); <sup>1</sup>H NMR (400 MHz, CDCl<sub>3</sub>) δ = 1.38 (d, *J* = 6.7 Hz, 6 H, CH(CH<sub>3</sub>)<sub>2</sub>), 3.40–3.50 (m, 1 H, CH(CH<sub>3</sub>)<sub>2</sub>), 4.03 (s, 3 H, NCH<sub>3</sub>), 4.15 (s, 3 H, CO<sub>2</sub>CH<sub>3</sub>), 7.31 (t, *J* = 7.4 Hz, 1 H, ArH), 7.42 (t, *J* = 7.4 Hz, 1 H, ArH), 7.48 (d, *J* = 8.2 Hz, 1 H, ArH), 7.90 (d, *J* = 7.8 Hz, 1 H, ArH), 7.97 (s, 1 H, ArH), 7.98 (s, 1 H, ArH) ppm; <sup>13</sup>C NMR (150 MHz, CDCl<sub>3</sub>) δ = 21.2, 28.6, 31.9, 52.8, 108.2, 109.6, 117.3, 118.7, 119.2, 121.4, 123.4, 123.6, 124.4, 133.0, 139.7, 149.7, 163.8 ppm; MS (ES): *m/z* (%) = 322.1 (100) [M+1]<sup>+</sup>; C<sub>19</sub>H<sub>19</sub>N<sub>3</sub>O<sub>2</sub> (321.1477): calcd. for C 71.01, H 5.96, N 13.08; found for C 71.11, H 5.99, N 13.13.

**Methyl 11-ethyl-11*H*-imidazo[1',5':1,2]pyrido[3,4-*b*]indole-5-carboxylate (1bE).** Yield: 53% (0.11 g from 0.20 g) as a yellow solid; m.p. 189-191 °C; *R<sub>f</sub>* = 0.25 (hexane/EtOAc, 50:50, v/v); IR (neat): ν<sub>max</sub> (cm<sup>-1</sup>) = 1698 (CO<sub>2</sub>CH<sub>3</sub>); <sup>1</sup>H NMR (400 MHz, CDCl<sub>3</sub>) δ = 1.53 (d, *J* = 7.2 Hz, 3 H, NCH<sub>2</sub>CH<sub>3</sub>), 4.02 (s, 3 H, CO<sub>2</sub>CH<sub>3</sub>), 4.50 (q, *J* = 7.2 Hz, 2 H, NCH<sub>2</sub>CH<sub>3</sub>), 7.33 (t, *J* = 6.8 Hz, 1 H, ArH), 7.43–7.49 (m, 2 H, ArH), 7.85 (s, 1 H, ArH), 7.92 (t, *J* = 9.2 Hz, 1 H, ArH), 8.27 (s, 1 H, ArH), 9.55 (s, 1 H, ArH) ppm; <sup>13</sup>C NMR (100 MHz, CDCl<sub>3</sub>) δ = 14.8, 40.1, 52.5, 109.2, 109.7, 116.2, 117.0, 119.0, 119.5, 121.6, 122.1, 123.6, 124.8, 132.2, 138.9, 163.1 ppm; HRMS (ESI) *m/z*: calcd. for C<sub>17</sub>H<sub>15</sub>N<sub>3</sub>O<sub>2</sub> [M + H<sup>+</sup>]: 294.1243, found: 294.1251.

**Methyl 11-benzyl-11*H*-imidazo[1',5':1,2]pyrido[3,4-*b*]indole-5-carboxylate (1dE).**<sup>Ref.2</sup> Yield: 48% (0.10 g from 0.20 g) as a light brown solid; m.p. 154-156 °C (Reported m.p. 156–157 °C); *R<sub>f</sub>* = 0.25 (hexane/EtOAc, 50:50, v/v); IR (neat): ν<sub>max</sub> (cm<sup>-1</sup>) = 2926, 2840, 2121, 1708, 1504, 1434, 1359, 1231, 1134, 912, 793, 742, 650; The similar <sup>1</sup>H and <sup>13</sup>C-NMR spectrum was obtained as reported in Ref 17. MS (ES): *m/z* (%) = 356.1 (100) [M+1]<sup>+</sup>; C<sub>22</sub>H<sub>17</sub>N<sub>3</sub>O<sub>2</sub> (355.1321).

**Methyl 11-(prop-2-yn-1-yl)-11*H*-imidazo[1',5':1,2]pyrido[3,4-*b*]indole-5-carboxylate (1fE).** Yield: 43% (0.09 g from 0.20 g) as a yellow solid; m.p. 249-251 °C; *R<sub>f</sub>* = 0.25 (hexane/EtOAc, 50:50, v/v); IR (neat): ν<sub>max</sub> (cm<sup>-1</sup>) = 1698 (CO<sub>2</sub>CH<sub>3</sub>); <sup>1</sup>H NMR (600 MHz, CDCl<sub>3</sub>) δ = 2.41 (s, 1 H, C≡CH), 4.06 (s, 3 H, CO<sub>2</sub>CH<sub>3</sub>), 5.30 (s, 2 H, NCH<sub>2</sub>), 7.39 (t, *J* = 7.2 Hz, 1 H, ArH), 7.50 (t, *J* = 7.5 Hz, 1 H, ArH), 7.59 (d, *J* = 8.5 Hz, 1 H, ArH), 7.99 (d, *J* = 7.7 Hz, 1 H, ArH), 8.08 (s, 1 H, ArH), 8.40 (s, 1 H, ArH), 9.66 (s, 1 H, ArH) ppm; <sup>13</sup>C NMR (150 MHz, CDCl<sub>3</sub>) δ = 34.8, 52.6, 74.4, 109.7, 109.8, 116.8, 117.2, 119.7, 119.8, 125.2, 132.6, 139.0, 163.1 ppm; HRMS (ESI) *m/z*: calcd. for C<sub>18</sub>H<sub>13</sub>N<sub>3</sub>O<sub>2</sub> [M + H<sup>+</sup>]: 304.1086, found: 304.1082.

**3-Ethyl 5-methyl 11-(prop-2-yn-1-yl)-11H-imidazo[1',5':1,2]pyrido[3,4-*b*]indole-3,5-dicarboxylate (1fi).** Yield: 35% (0.09 g from 0.20 g) as a yellow solid; m.p. 198-200 °C;  $R_f$  = 0.35 (hexane/EtOAc, 70:30, v/v); IR (neat):  $\nu_{\max}$  ( $\text{cm}^{-1}$ ) = 1714 ( $\text{CO}_2\text{CH}_3$  and  $\text{CO}_2\text{CH}_2\text{CH}_3$ );  $^1\text{H}$  NMR (400 MHz,  $\text{CDCl}_3$ )  $\delta$  = 1.48 (t,  $J$  = 7.1 Hz, 3 H,  $\text{CO}_2\text{CH}_2\text{CH}_3$ ), 2.40 (s, 1 H,  $\text{C}\equiv\text{CH}$ ), 3.97 (s, 3 H,  $\text{CO}_2\text{CH}_3$ ), 4.50 (q,  $J$  = 7.1 Hz, 2 H,  $\text{CO}_2\text{CH}_2\text{CH}_3$ ), 5.29 (s, 2 H,  $\text{NCH}_2$ ), 7.38 (t,  $J$  = 7.3 Hz, 1 H, ArH), 7.52 (t,  $J$  = 7.6 Hz, 1 H, ArH), 7.58 (d,  $J$  = 8.2 Hz, 1 H, ArH), 7.97 (d,  $J$  = 7.8 Hz, 1 H, ArH), 8.09 (d,  $J$  = 8.1 Hz, 2 H, ArH) ppm;  $^{13}\text{C}$  NMR (100 MHz,  $\text{CDCl}_3$ )  $\delta$  = 14.5, 34.8, 52.6, 62.0, 74.7, 76.6, 109.9, 112.5, 115.9, 120.1, 120.8, 121.3, 122.2, 123.2, 125.3, 126.0, 130.4, 133.6, 139.1, 160.3, 163.9 ppm; HRMS (ESI)  $m/z$ : calcd. for  $\text{C}_{21}\text{H}_{17}\text{N}_3\text{O}_4$  [ $\text{M} + \text{H}^+$ ]: 376.1297, found: 376.1265.

**3-(Pyridin-2-yl)imidazo[1,5-*a*]pyridine (DD).** <sup>Ref. 3</sup> Yield: 73% (0.20 g from 0.15 g) as a pale yellow solid; m.p. 105-106 °C (Reported m.p. 105-107 °C);  $R_f$  = 0.20 (hexane/EtOAc, 90:10, v/v); IR (neat):  $\nu_{\max}$  ( $\text{cm}^{-1}$ ) = 2927, 2858, 2119, 1585, 1492, 1249;  $^1\text{H}$  NMR (600 MHz,  $\text{CDCl}_3$ )  $\delta$  = 6.71 (t,  $J$  = 6.7 Hz, 1 H, ArH), 6.84 (t,  $J$  = 7.1 Hz, 1 H, ArH), 7.17 (t,  $J$  = 5.8 Hz, 1 H, ArH), 7.52 (d,  $J$  = 9.0 Hz, 1 H, ArH), 7.59 (s, 1 H, ArH), 7.76 (t,  $J$  = 7.7 Hz, 1 H, ArH), 8.34 (d,  $J$  = 8.0 Hz, 1 H, ArH), 8.62 (d,  $J$  = 2.2 Hz, 1 H, ArH), 9.95 (d,  $J$  = 7.1 Hz, 1 H, ArH) ppm;  $^{13}\text{C}$  NMR (150 MHz,  $\text{CDCl}_3$ )  $\delta$  = 113.6, 118.1, 120.2, 121.1, 121.6, 121.8, 126.1, 133.0, 135.5, 136.6, 148.2, 151.2 ppm; HRMS (ESI)  $m/z$ : calcd. for  $\text{C}_{12}\text{H}_9\text{N}_3$  [ $\text{M} + \text{H}^+$ ]: 196.0875, found: 196.0877.

**Imidazo[1,5-*a*]pyridine (DE).** Yield: 77% (0.34 g from 0.40 g) as a brown oil;  $R_f$  = 0.25 (hexane/EtOAc, 50:50, v/v); IR (neat):  $\nu_{\max}$  ( $\text{cm}^{-1}$ ) = 3124, 2496, 1708, 1366, 1250, 1111;  $^1\text{H}$  NMR (600 MHz,  $\text{CDCl}_3$ )  $\delta$  = 6.55 (t,  $J$  = 6.6 Hz, 1 H, ArH), 6.69 (t,  $J$  = 7.9 Hz, 1 H, ArH), 7.39–7.42 (m, 2 H, ArH), 7.90 (d,  $J$  = 7.0 Hz, 1 H, ArH), 8.17 (s, 1 H, ArH) ppm;  $^{13}\text{C}$  NMR (150 MHz,  $\text{CDCl}_3$ )  $\delta$  = 113.2, 118.5, 119.0, 119.5, 122.3, 127.5, 130.3 ppm; HRMS (ESI)  $m/z$ : calcd. for  $\text{C}_7\text{H}_6\text{N}_2$  [ $\text{M} + \text{H}^+$ ]: 119.0609, found: 119.0600.

**3-Propylimidazo[1,5-*a*]pyridine (DG).** <sup>Ref. 3</sup> Yield: 57% (0.17 g from 0.20 g) as a brown oil;  $R_f$  = 0.30 (hexane/EtOAc, 70:30, v/v); IR (neat):  $\nu_{\max}$  ( $\text{cm}^{-1}$ ) = 2966, 2877, 1709, 1364, 1254, 1045;  $^1\text{H}$  NMR (600 MHz,  $\text{CDCl}_3$ )  $\delta$  = 1.00 (t,  $J$  = 7.2 Hz, 3 H,  $\text{CH}_2\text{CH}_2\text{CH}_3$ ), 1.81–1.87 (m, 2 H,  $\text{CH}_2\text{CH}_2\text{CH}_3$ ), 2.94 (t,  $J$  = 7.3 Hz, 2 H,  $\text{CH}_2\text{CH}_2\text{CH}_3$ ), 6.51 (t,  $J$  = 6.5 Hz, 1 H, ArH), 6.60–6.65 (m, 1 H, ArH), 7.35 (s, 1 H, ArH), 7.37 (d,  $J$  = 9.2 Hz, 1 H, ArH), 7.69 (d,  $J$  = 7.0 Hz, 1 H, ArH) ppm;  $^{13}\text{C}$  NMR (150 MHz,  $\text{CDCl}_3$ )  $\delta$  = 14.0, 20.5, 28.3, 112.5, 117.9, 118.8, 120.6, 130.2, 138.8 ppm; MS (ES):  $m/z$  (%) = 161.0 (100) [ $\text{M}+1$ ] $^+$ ;  $\text{C}_{10}\text{H}_{12}\text{N}_2$  (160.1000): calcd. for C 74.97, H 7.55, N 17.48; found for C 75.04, H 7.58, N 17.53.

**7-Chloro-3-(4-chloropyridin-2-yl)imidazo[1,5-*a*]pyridine (JJ).** Yield: 54% (0.10 g from 0.10 g) as a pale yellow solid; m.p. 121-123 °C;  $R_f$  = 0.60 (hexane/EtOAc, 90:10, v/v); IR (neat):  $\nu_{\max}$  ( $\text{cm}^{-1}$ ) = 2927, 2113, 1576, 1488, 1357, 1254;  $^1\text{H}$  NMR (400 MHz,  $\text{CDCl}_3$ )  $\delta$  = 6.69 (dd,  $J_1$  = 7.7 Hz,  $J_2$  = 2.0 Hz, 1 H, ArH), 7.20 (dd,  $J_1$  = 5.4 Hz,  $J_2$  = 1.9 Hz, 1 H, ArH), 7.52 (s, 2 H, ArH), 8.35 (d,  $J$  = 1.9 Hz, 1 H, ArH), 8.49 (d,  $J$  = 5.4 Hz, 1 H, ArH), 9.87 (d,  $J$  = 7.7 Hz, 1 H, ArH) ppm;  $^{13}\text{C}$  NMR (100 MHz,

CDCl<sub>3</sub>)  $\delta$  = 115.5, 116.6, 121.2, 121.7, 122.2, 126.9, 133.2, 134.7, 144.7, 149.3, 151.9 ppm; HRMS (ESI)  $m/z$ : calcd. for C<sub>12</sub>H<sub>7</sub>Cl<sub>2</sub>N<sub>3</sub> [M + H<sup>+</sup>]: 264.0095, found: 264.0087.

**6-bromo-3-(5-bromopyridin-2-yl)imidazo[1,5-*a*]pyridine (KK).** Yield: 37% (0.035 g from 0.05 g) as a light brown solid; m.p. 190-192 °C;  $R_f$  = 0.57 (hexane/EtOAc, 90:10, v/v); <sup>1</sup>H NMR (400 MHz, CDCl<sub>3</sub>)  $\delta$  = 6.93 (d,  $J$  = 9.4 Hz, 1 H, ArH), 7.43 (d,  $J$  = 9.4 Hz, 1 H, ArH), 7.59 (s, 1 H, ArH), 7.88 (dd,  $J_1$  = 8.6 Hz,  $J_2$  = 2.0 Hz, 1 H, ArH), 8.20 (d,  $J$  = 8.6 Hz, 1 H, ArH), 8.68 (d,  $J$  = 1.3 Hz, 1 H, ArH), 10.03 (s, 1 H, ArH) ppm; <sup>13</sup>C NMR (100 MHz, CDCl<sub>3</sub>)  $\delta$  = 109.7, 118.6, 118.9, 122.5, 123.1, 124.1, 125.9, 131.4, 134.8, 139.5, 148.9, 149.3 ppm; HRMS (ESI)  $m/z$ : calcd. for C<sub>12</sub>H<sub>7</sub>Br<sub>2</sub>N<sub>3</sub> [M + H<sup>+</sup>]: 351.9085, found: 351.9109.

**5-bromo-3-(6-bromopyridin-2-yl)imidazo[1,5-*a*]pyridine (LL).** Yield: 32% (0.030 g from 0.05 g) as a pale yellow solid; m.p. 162-164 °C;  $R_f$  = 0.50 (hexane/EtOAc, 90:10, v/v); <sup>1</sup>H NMR (400 MHz, CDCl<sub>3</sub>)  $\delta$  = 6.64–6.72 (m, 1 H, ArH), 6.94 (d,  $J$  = 6.7 Hz, 1 H, ArH), 7.53 (t,  $J$  = 7.2 Hz, 2 H, ArH), 7.66 (t,  $J$  = 7.3 Hz, 2 H, ArH), 7.77 (d,  $J$  = 7.3 Hz, 1 H, ArH) ppm; <sup>13</sup>C NMR (100 MHz, CDCl<sub>3</sub>)  $\delta$  = 112.3, 117.8, 120.4, 120.5, 121.7, 124.5, 127.6, 138.4, 140.1, 151.9 ppm; HRMS (ESI)  $m/z$ : calcd. for C<sub>12</sub>H<sub>7</sub>Br<sub>2</sub>N<sub>3</sub> [M + H<sup>+</sup>]: 351.9085, found: 351.9098.

**Methyl 3-formyl-11-methyl-11*H*-imidazo[1',5':1,2]pyrido[3,4-*b*]indole-5-carboxylate (2aK).** Yield: 74% (0.17 g from 0.20 g) as a light brown solid; m.p. 193-194 °C;  $R_f$  = 0.25 (hexane/EtOAc, 50:50, v/v); IR (neat):  $\nu_{\max}$  (cm<sup>-1</sup>) = 1720 (CO<sub>2</sub>CH<sub>3</sub>), 1690 (CHO); <sup>1</sup>H NMR (600 MHz, CDCl<sub>3</sub>)  $\delta$  = 3.87 (s, 3 H, NCH<sub>3</sub>), 3.98 (s, 3 H, CO<sub>2</sub>CH<sub>3</sub>), 7.30 (t,  $J$  = 6.9 Hz, 1 H, ArH), 7.36 (d,  $J$  = 7.9 Hz, 1 H, ArH), 7.42 (t,  $J$  = 6.9 Hz, 1 H, ArH), 7.81 (d,  $J$  = 8.3 Hz, 2 H, ArH), 8.03 (s, 1 H, ArH), 9.47 (s, 1 H, CHO) ppm; <sup>13</sup>C NMR (150 MHz, CDCl<sub>3</sub>)  $\delta$  = 31.6, 52.5, 108.9, 109.7, 116.0, 116.9, 118.5, 119.3, 121.6, 123.2, 124.8, 132.8, 139.7, 162.8, 175.3 ppm; MS (ES):  $m/z$  (%) = 308.1 (100) [M+1]<sup>+</sup>; C<sub>17</sub>H<sub>13</sub>N<sub>3</sub>O<sub>3</sub> (307.0957): calcd. for C 66.44, H 4.26, N 13.67; found for C 66.53, H 4.28, N 13.70.

**Imidazo[1,5-*a*]pyridine-3-carbaldehyde (2DK).** Yield: 82% (0.45 g from 0.40 g) as a grey solid; m.p. 60-62 °C;  $R_f$  = 0.30 (hexane/EtOAc, 80:20, v/v); IR (neat):  $\nu_{\max}$  (cm<sup>-1</sup>) = 1651 (CHO); <sup>1</sup>H NMR (600 MHz, CDCl<sub>3</sub>)  $\delta$  = 7.05 (t,  $J$  = 6.5 Hz, 1 H, ArH), 7.23-7.27 (m, 1 H, ArH), 7.72 (d,  $J$  = 8.9 Hz, 1 H, ArH), 7.75 (s, 1 H, ArH), 9.52 (d,  $J$  = 6.7 Hz, 1 H, ArH), 9.98 (s, 1 H, CHO) ppm; <sup>13</sup>C NMR (150 MHz, CDCl<sub>3</sub>)  $\delta$  = 116.8, 118.1, 125.3, 125.5, 125.9, 135.1, 135.8, 179.8 ppm; MS (ES):  $m/z$  (%) = 147.1 (100) [M+1]<sup>+</sup>; C<sub>8</sub>H<sub>6</sub>N<sub>2</sub>O (146.0480): calcd. for C 65.75, H 4.14, N 19.17; found for C 65.83, H 4.17, N 19.22.

**General procedure for the synthesis of compound 6-7 as exemplified for 3-(pyridin-2-yl)imidazo[1,5-*a*]pyridine-1-carbaldehyde (7):** To a stirred solution of anhydrous DMF (3 mL) at 0 °C, POCl<sub>3</sub> (0.19 mL, 2.04 mmol) was added drop-wise and the reaction mixture was stirred for 10 min to prepare the Vilsmeier reagent. Thereafter, **DD** (0.20 g, 1.02 mmol) dissolved in DMF (2 mL) was added and the reaction mixture was stirred at room temperature for 10 min and then heated at 80 °C for 2 h. After completion of reaction as monitored by TLC, the reaction

content was poured into ice cold water and extracted with ethyl acetate, dried over anhydrous  $\text{Na}_2\text{SO}_4$  and concentrated under reduced pressure to yield the crude solid product which was purified through column chromatography by using hexane/EtOAc (9:1, v/v) as an eluent to afford **7** as a light brown solid (0.15 g, 65%;  $R_f$  = 0.20 (hexane/EtOAc, 80:20, v/v).

**Methyl 1-formyl-3-(3-(methoxycarbonyl)-9-methyl-9H-pyrido[3,4-b]indol-1-yl)-11-methyl-11H-imidazo[1',5':1,2] pyrido[3,4-b]indole-5-carboxylate (6).** Yield: 76% (0.08 g from 0.10 g) as a yellow solid; m.p. >250 °C;  $R_f$  = 0.40 (hexane/EtOAc, 60:40, v/v); IR (neat):  $\nu_{\text{max}}$  ( $\text{cm}^{-1}$ ) = 1710 ( $\text{CO}_2\text{CH}_3$ ), 1677 (CHO);  $^1\text{H}$  NMR (400 MHz,  $\text{CDCl}_3$ )  $\delta$  = 3.33 (s, 3 H,  $\text{CO}_2\text{CH}_3$ ), 4.01 (s, 3 H,  $\text{NCH}_3$ ), 4.06 (s, 3 H,  $\text{NCH}_3$ ), 4.30 (s, 3 H,  $\text{CO}_2\text{CH}_3$ ), 7.42 (t,  $J$  = 7.7 Hz, 2 H, ArH), 7.60–7.64 (m, 4 H, ArH), 7.69 (d,  $J$  = 7.8 Hz, 1 H, ArH), 8.07 (d,  $J$  = 7.9 Hz, 1 H, ArH), 8.27 (s, 1 H, ArH), 8.95 (s, 1 H, ArH), 10.34 (s, 1 H, CHO) ppm;  $^{13}\text{C}$  NMR (100 MHz,  $\text{CDCl}_3$ )  $\delta$  = 33.4, 35.8, 52.3, 52.8, 110.5, 111.3, 116.4, 117.2, 118.1, 120.3, 120.4, 121.2, 121.5, 121.8, 122.2, 122.7, 126.0, 127.1, 129.5, 131.9, 132.0, 132.3, 135.1, 135.9, 139.8, 142.7, 143.6, 163.0, 166.2, 185.3 ppm; HRMS (ESI)  $m/z$ : calcd. for  $\text{C}_{31}\text{H}_{23}\text{N}_5\text{O}_5$  [ $\text{M} + \text{H}^+$ ]: 546.1777, found: 546.1782.

**3-(Pyridin-2-yl)imidazo[1,5- $\alpha$ ]pyridine-1-carbaldehyde (7).** Yield: 65% (0.15 g from 0.20 g) as a light brown solid; m.p. 141–143 °C;  $R_f$  = 0.20 (hexane/EtOAc, 80:20, v/v); IR (neat):  $\nu_{\text{max}}$  ( $\text{cm}^{-1}$ ) = 3118, 2811, 2782, 2119, 1851, 1664, 1493, 1158;  $^1\text{H}$  NMR (400 MHz,  $\text{CDCl}_3$ )  $\delta$  = 7.02 (t,  $J$  = 6.9 Hz, 1 H, ArH), 7.29–7.38 (m, 2 H, ArH), 7.85 (t,  $J$  = 7.8 Hz, 1 H, ArH), 8.35–8.43 (m, 2 H, ArH), 8.66 (d,  $J$  = 4.7 Hz, 1 H, ArH), 10.15 (d,  $J$  = 7.1 Hz, 1 H, ArH), 10.17 (s, 1 H, CHO) ppm;  $^{13}\text{C}$  NMR (100 MHz,  $\text{CDCl}_3$ )  $\delta$  = 116.0, 119.2, 122.7, 123.1, 127.4, 127.6, 130.6, 135.7, 137.1, 148.4, 150.2, 186.1 ppm; HRMS (ESI)  $m/z$ : calcd. for  $\text{C}_{13}\text{H}_9\text{N}_3\text{O}$  [ $\text{M} + \text{H}^+$ ]: 224.0824, found: 224.0820.

**General procedure for the synthesis of 1-(imidazo[1,5- $\alpha$ ]pyridin-3-yl)but-3-en-1-ol (8).** To a stirred solution of allyl bromide (0.15 mL, 1.70 mmol) in 4 mL of THF:H<sub>2</sub>O (1:1 v/v), Indium powder (0.086 g, 0.75 mmol) and imidazo[1,5- $\alpha$ ]pyridine-3-carbaldehyde **2DK** (0.10 g, 0.68 mmol) was added at room temperature and stirred the content for 20 min. After the completion of reaction as monitored by TLC, the reaction mixture was poured into water and extracted with ethyl acetate (2 x 10 mL), dried over anhydrous  $\text{Na}_2\text{SO}_4$  and concentrated under reduced pressure to yield the crude product which was purified through column chromatography by using silica gel (60–120 mesh size) and hexane: ethyl acetate (7:3, v/v) as an eluent to afford **8** as a brown oil (0.085 g, 66%;  $R_f$  = 0.20 (hexane/EtOAc, 70:30, v/v).

**1-(Imidazo[1,5- $\alpha$ ]pyridin-3-yl)but-3-en-1-ol (8).** Yield: 66% (0.085 g from 0.100 g) as a brown oil;  $R_f$  = 0.20 (hexane/EtOAc, 70:30, v/v); IR (neat):  $\nu_{\text{max}}$  ( $\text{cm}^{-1}$ ) = 3082, 2916, 2854, 1714, 1641, 1436, 1328, 1039;  $^1\text{H}$  NMR (400 MHz,  $\text{CDCl}_3$ )  $\delta$  = 2.89 (t,  $J$  = 6.9 Hz, 2 H,  $\text{CH}_2$ ), 5.13 (dd,  $J_1$  = 7.8 Hz,  $J_2$  = 5.1 Hz, 2 H,  $\text{CHOH}$  and  $\text{CHOH}$ ), 5.16–5.22 (m, 2 H, = $\text{CHH}$ ), 5.88–5.93 (m, 1 H,  $\text{CHCH}_2$ ), 6.56 (t,  $J$  = 6.6 Hz, 1 H, ArH), 6.71 (dd,  $J_1$  = 9.1 Hz,  $J_2$  = 6.4 Hz, 1 H, ArH), 7.31 (s, 1 H, ArH), 7.40 (d,  $J$  = 9.1 Hz, 1 H, ArH), 8.15 (d,  $J$  = 7.1 Hz, 1 H, ArH) ppm;  $^{13}\text{C}$  NMR (100 MHz,  $\text{CDCl}_3$ )  $\delta$  = 39.6,

67.0, 112.5, 118.1, 118.5, 118.6, 118.9, 122.3, 131.3, 134.0, 139.2 ppm; MS (ES):  $m/z$  (%) = 189.2 (100)  $[M+1]^+$ ;  $C_{11}H_{12}N_2O$  (188.0950): calcd. for C 70.19, H 6.43, N 14.88; found for C 70.30, H 6.47, N 14.94.

## References

1. D. Singh, P. Sharma, R. Kumar, S. K. Pandey, C. C. Malakar and V. Singh, *Asian J. Org. Chem.*, 2018, **7**, 383.
2. D. Singh, V. Kumar, N. Devi, C. C. Malakar, R. Shankar and V. Singh, *Adv. Synth. Catal.*, 2017, **359**, 1213.
3. M. Li, Y. Xie, Y. Ye, Y. Zou, H. Jiang and W. Zeng, *Org. Lett.*, 2014, **16**, 6232.

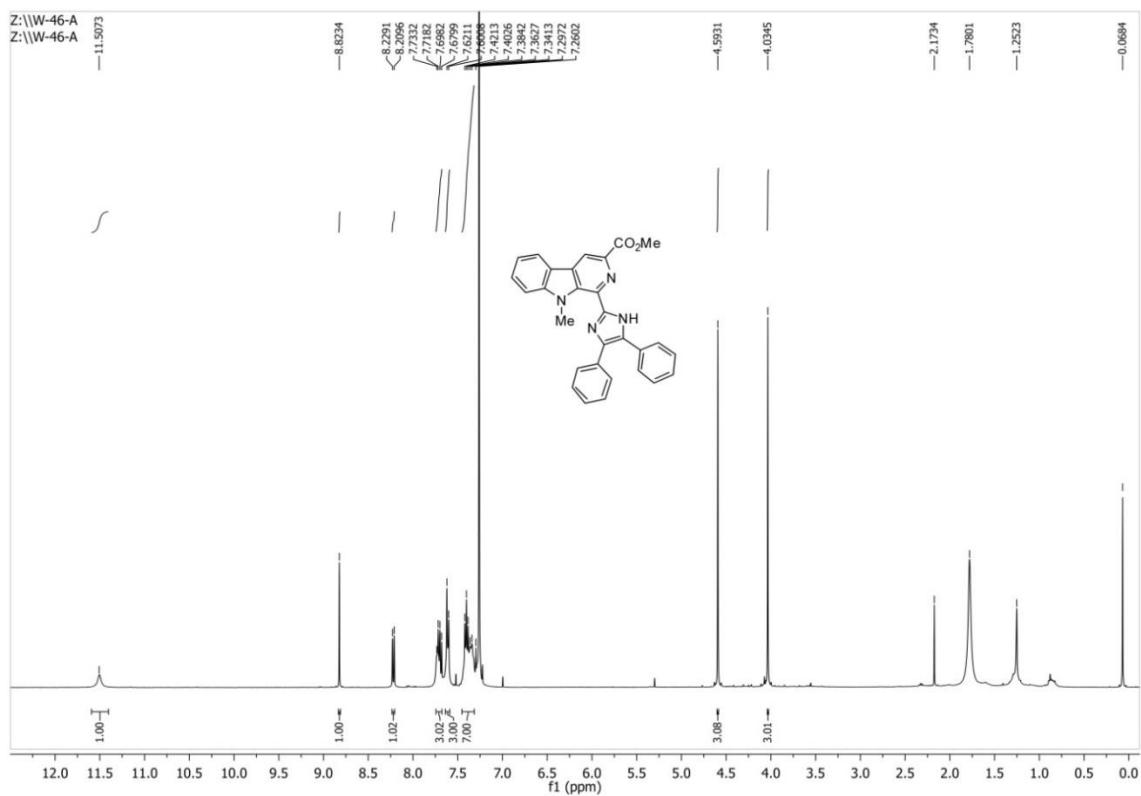

**Figure S1.**  $^1\text{H}$ -NMR spectrum of **3a**.

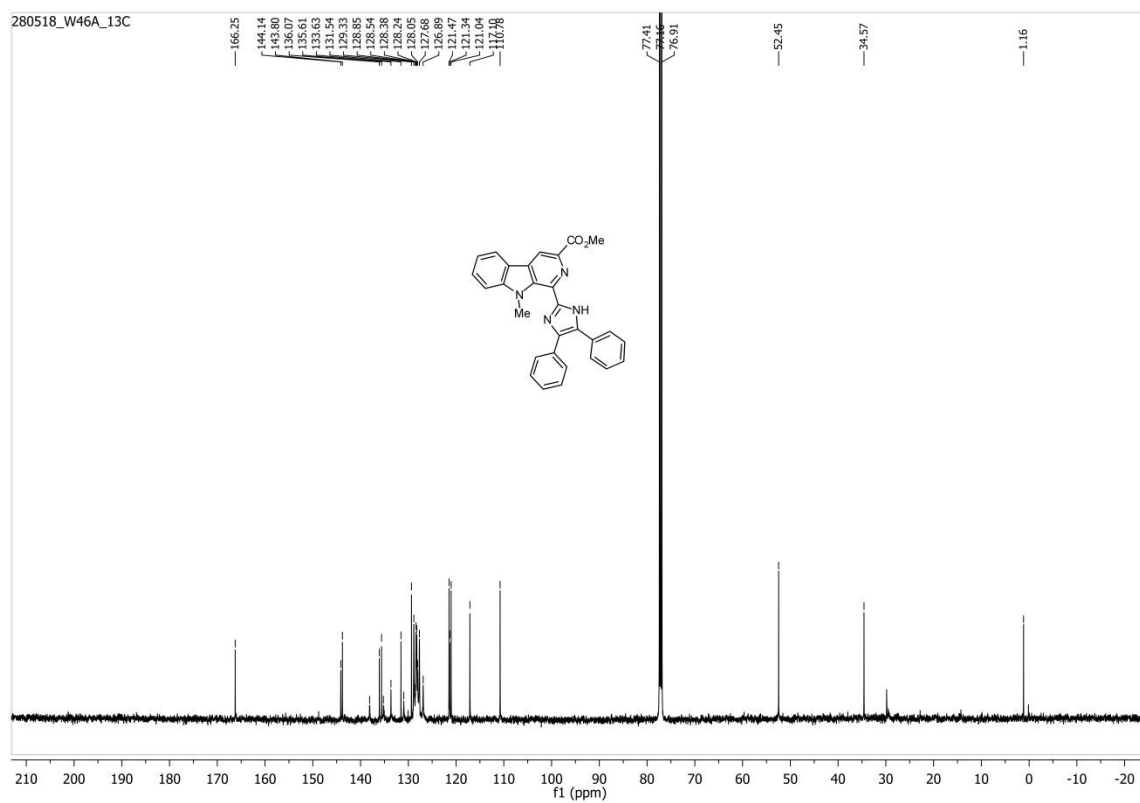

**Figure S2.**  $^{13}\text{C}$ -NMR spectrum of **3a**.

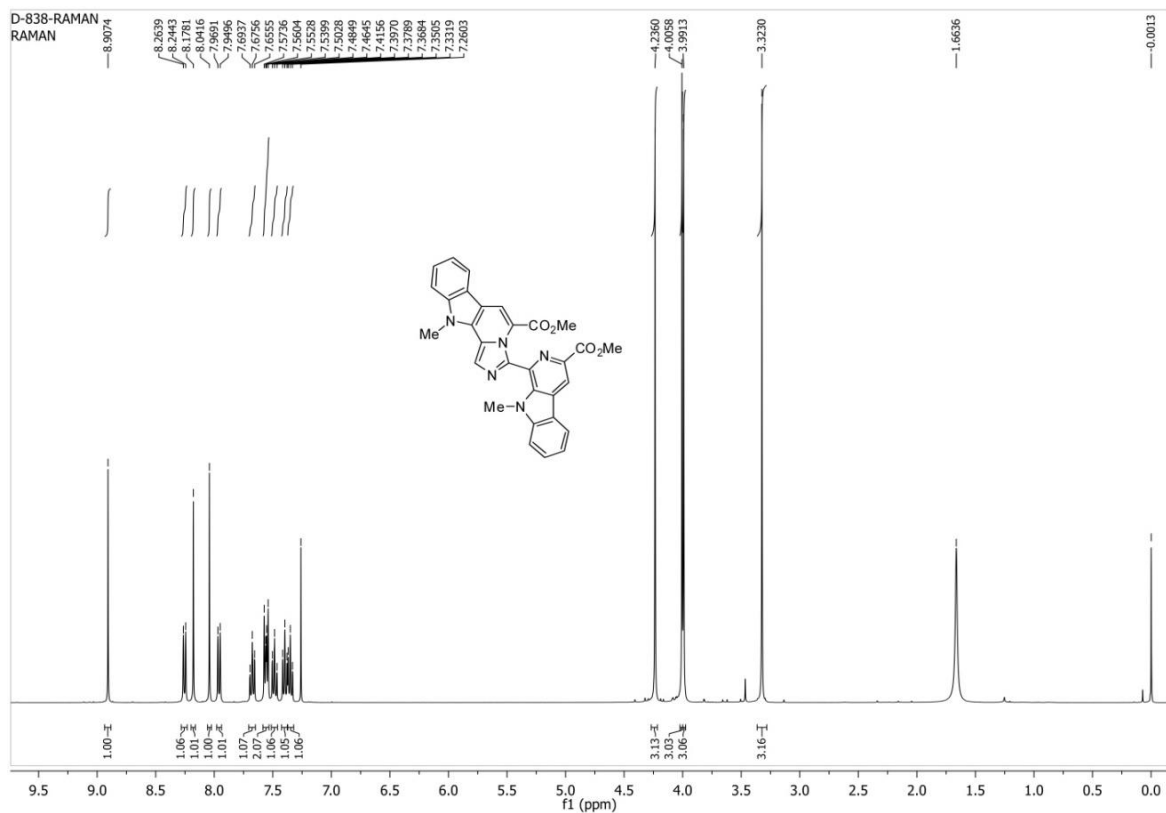

Figure S3.  $^1\text{H}$ -NMR spectrum of 4a.

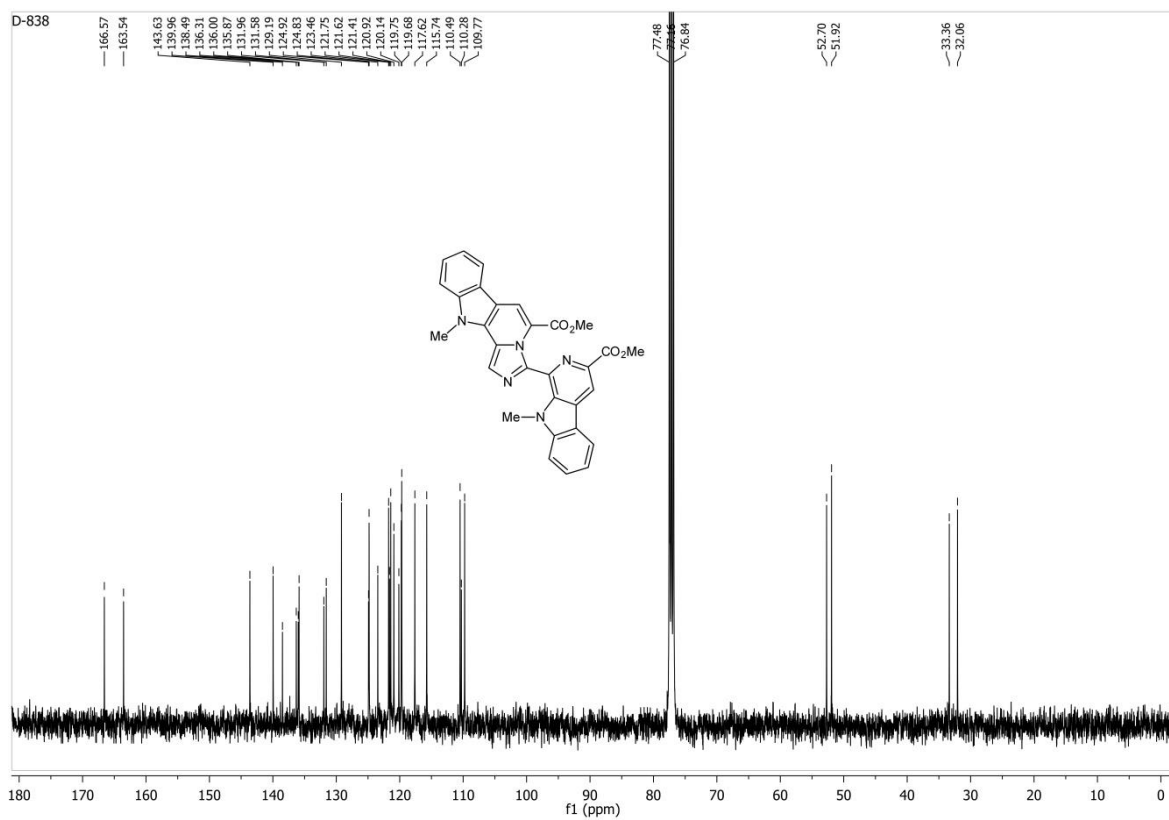

Figure S4.  $^{13}\text{C}$ -NMR spectrum of 4a.



Compound Table

| Compound Label       | RT  | Mass     | Formula       | MFG Formula   | MFG Diff (ppm) | DB Formula    |
|----------------------|-----|----------|---------------|---------------|----------------|---------------|
| Cpd 2: C30 H23 N5 O4 | 0.4 | 517.1752 | C30 H23 N5 O4 | C30 H23 N5 O4 | -0.46          | C30 H23 N5 O4 |

| Compound Label       | m/z      | RT  | Algorithm                 | Mass     |
|----------------------|----------|-----|---------------------------|----------|
| Cpd 2: C30 H23 N5 O4 | 518.1825 | 0.4 | Find by Molecular Feature | 517.1752 |

MFE MS Spectrum

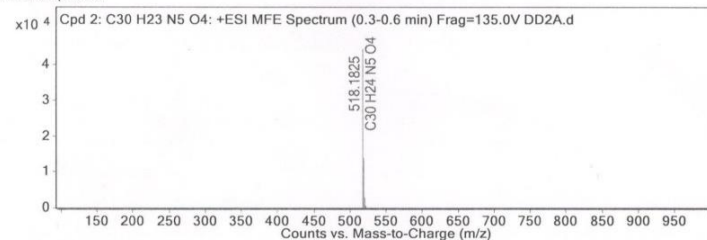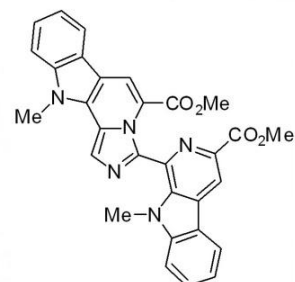

MS Spectrum Peak List

| m/z      | z | Abund    | Formula       | Ion    |
|----------|---|----------|---------------|--------|
| 518.1825 | 1 | 44554.31 | C30 H24 N5 O4 | (M+H)+ |
| 519.1853 | 1 | 13936.31 | C30 H24 N5 O4 | (M+H)+ |
| 520.1891 | 1 | 2796.59  | C30 H24 N5 O4 | (M+H)+ |
| 521.1922 | 1 | 567.28   | C30 H24 N5 O4 | (M+H)+ |

Predicted Isotope Match Table

| Isotope | m/z      | Calc m/z | Diff (ppm) | Abund % | Calc Abund % | Abund Sum % | Calc Abund Sum % |
|---------|----------|----------|------------|---------|--------------|-------------|------------------|
| 1       | 518.1825 | 518.1823 | -0.5       | 100     | 100          | 72.03       | 70.28            |
| 2       | 519.1853 | 519.1853 | 0.05       | 31.28   | 34.7         | 22.53       | 24.39            |
| 3       | 520.1891 | 520.1881 | -1.92      | 6.28    | 6.66         | 4.52        | 4.68             |
| 4       | 521.1922 | 521.1908 | -2.55      | 1.27    | 0.92         | 0.92        | 0.65             |

--- End Of Report ---

Figure S5. HRMS spectrum of 4a.

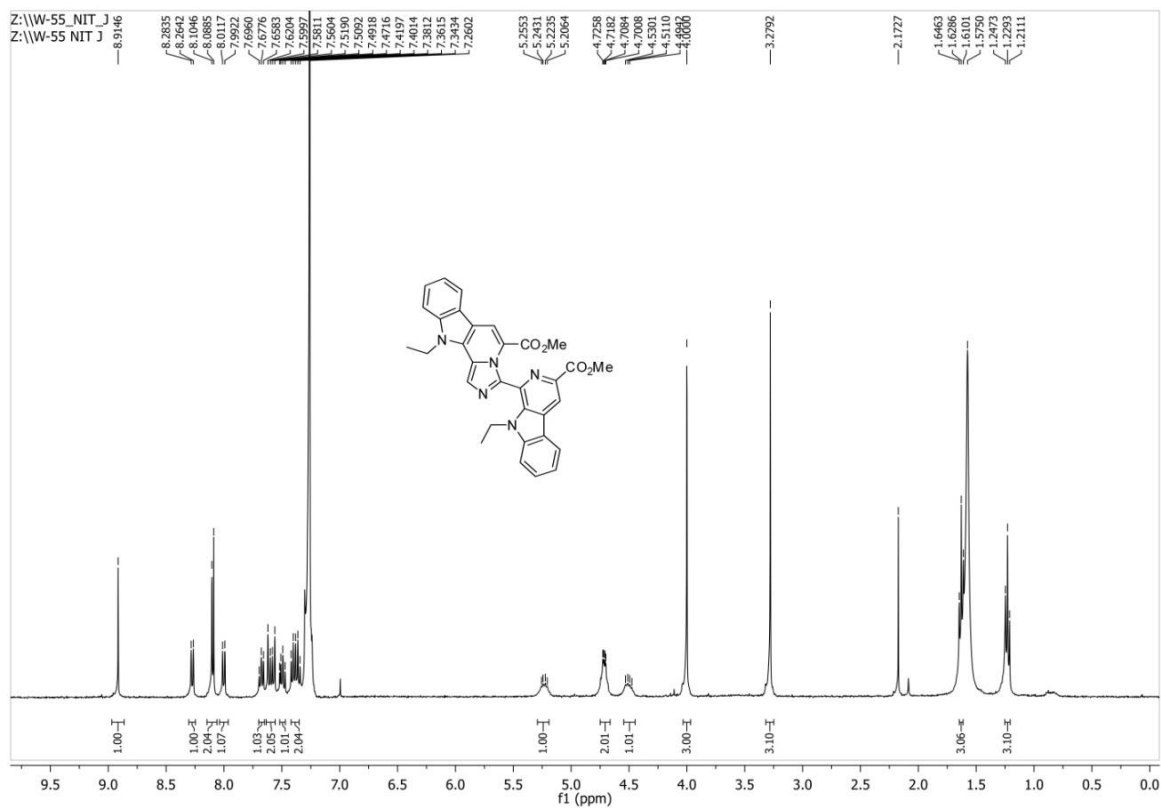Figure S6. <sup>1</sup>H-NMR spectrum of 4b.

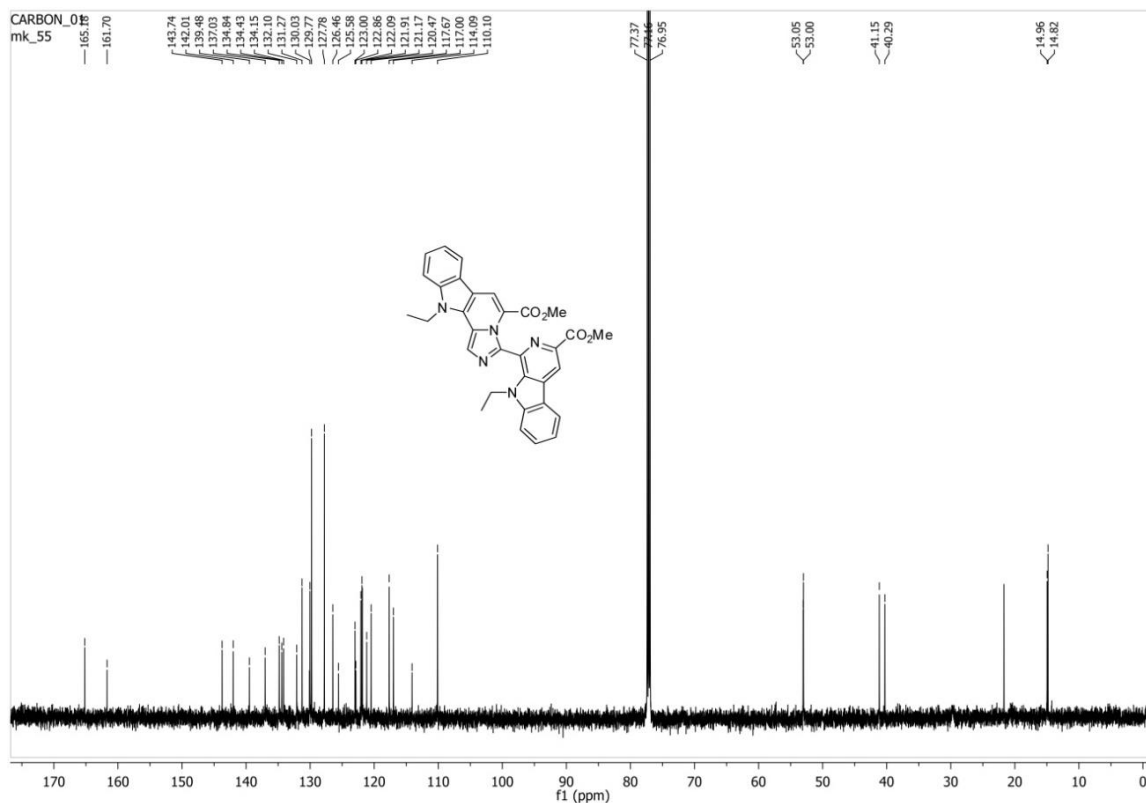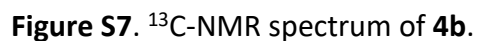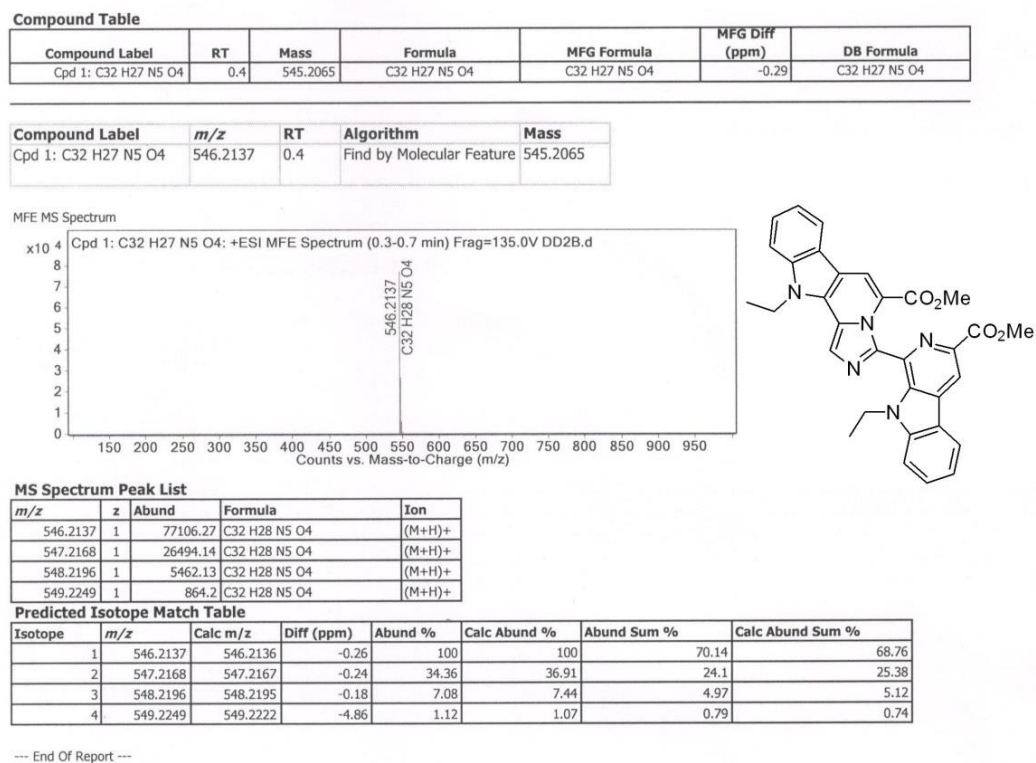

**Figure S8.** HRMS spectrum of **4b**.

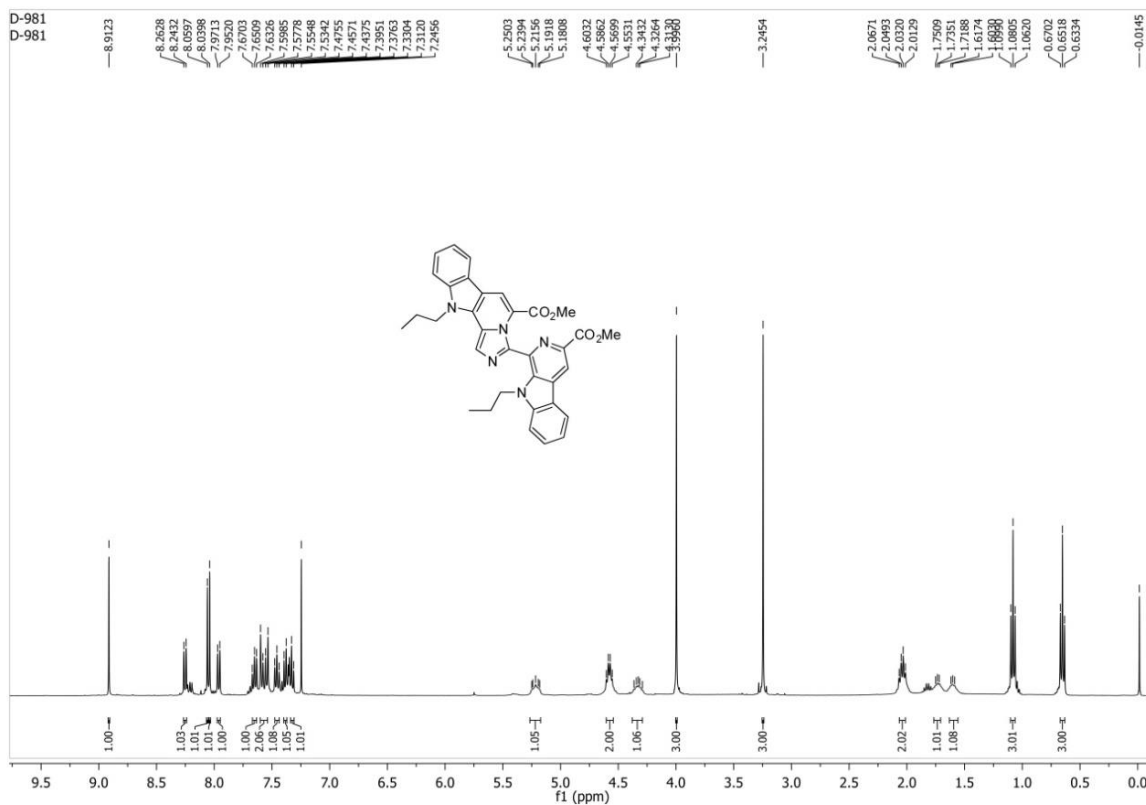

Figure S9. <sup>1</sup>H-NMR spectrum of 4c.

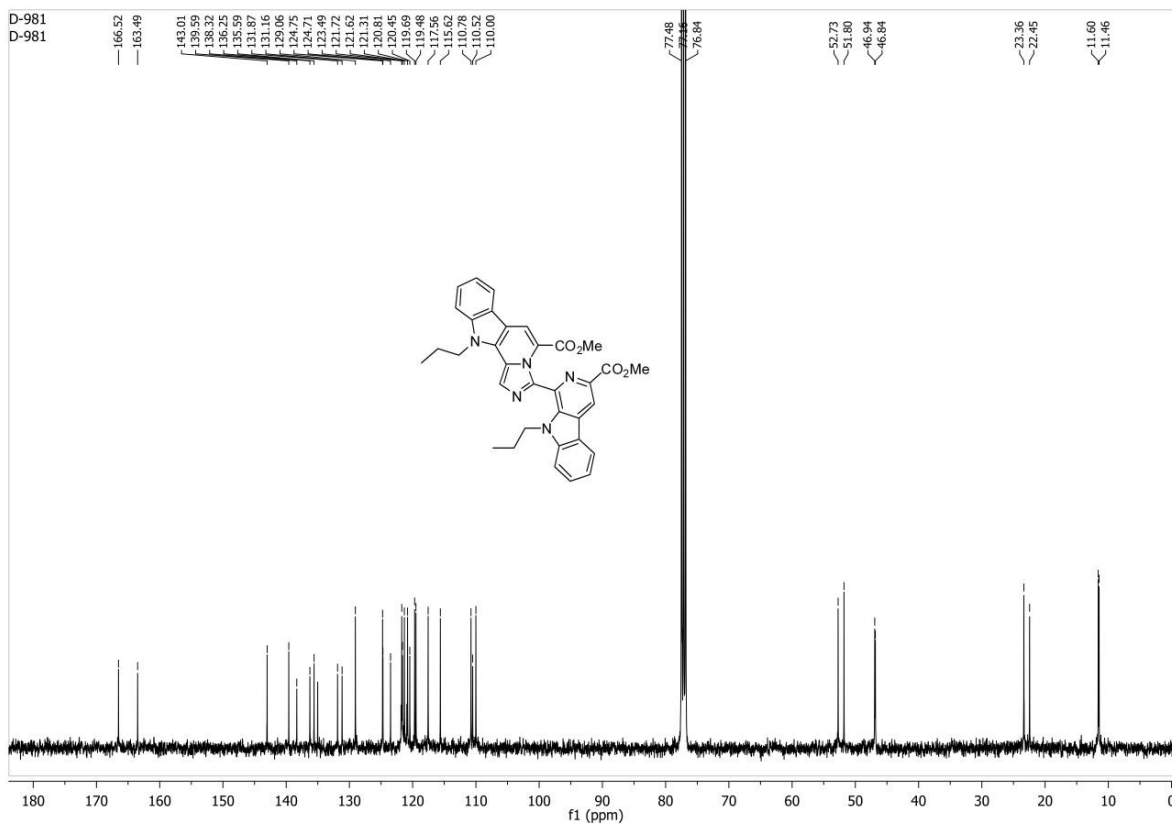

Figure S10. <sup>13</sup>C-NMR spectrum of 4c.

Compound Table

| Compound Label        | RT  | Mass     | Formula       | MFG Formula   | MFG Diff (ppm) | DB Formula    |
|-----------------------|-----|----------|---------------|---------------|----------------|---------------|
| Cpd 17: C34 H31 N5 O4 | 0.4 | 573.2377 | C34 H31 N5 O4 | C34 H31 N5 O4 | -0.25          | C34 H31 N5 O4 |

| Compound Label        | m/z      | RT  | Algorithm                 | Mass     |
|-----------------------|----------|-----|---------------------------|----------|
| Cpd 17: C34 H31 N5 O4 | 574.2451 | 0.4 | Find by Molecular Feature | 573.2377 |

MFE MS Spectrum

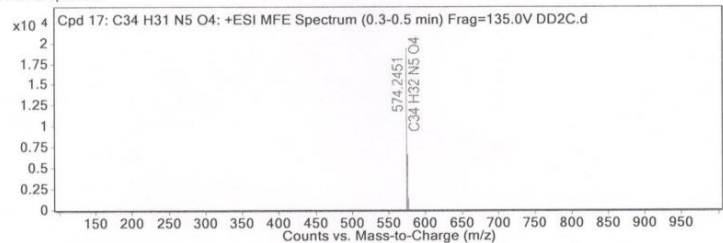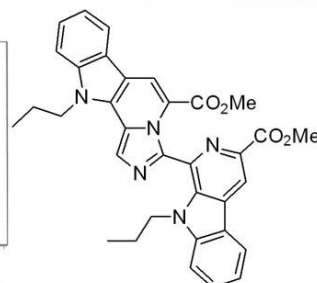

MS Spectrum Peak List

| m/z      | z | Abund    | Formula       | Ion    |
|----------|---|----------|---------------|--------|
| 574.2451 | 1 | 19410.45 | C34 H32 N5 O4 | (M+H)+ |
| 575.2477 | 1 | 6646.13  | C34 H32 N5 O4 | (M+H)+ |
| 576.252  | 1 | 1434.84  | C34 H32 N5 O4 | (M+H)+ |

Predicted Isotope Match Table

| Isotope | m/z      | Calc m/z | Diff (ppm) | Abund % | Calc Abund % | Abund Sum % | Calc Abund Sum % |
|---------|----------|----------|------------|---------|--------------|-------------|------------------|
| 1       | 574.2451 | 574.2449 | -0.36      | 100     | 100          | 70.61       | 67.85            |
| 2       | 575.2477 | 575.248  | 0.42       | 34.24   | 39.12        | 24.18       | 26.54            |
| 3       | 576.252  | 576.2509 | -1.93      | 7.39    | 8.27         | 5.22        | 5.61             |

--- End Of Report ---

Figure S11. HRMS spectrum of 4c.

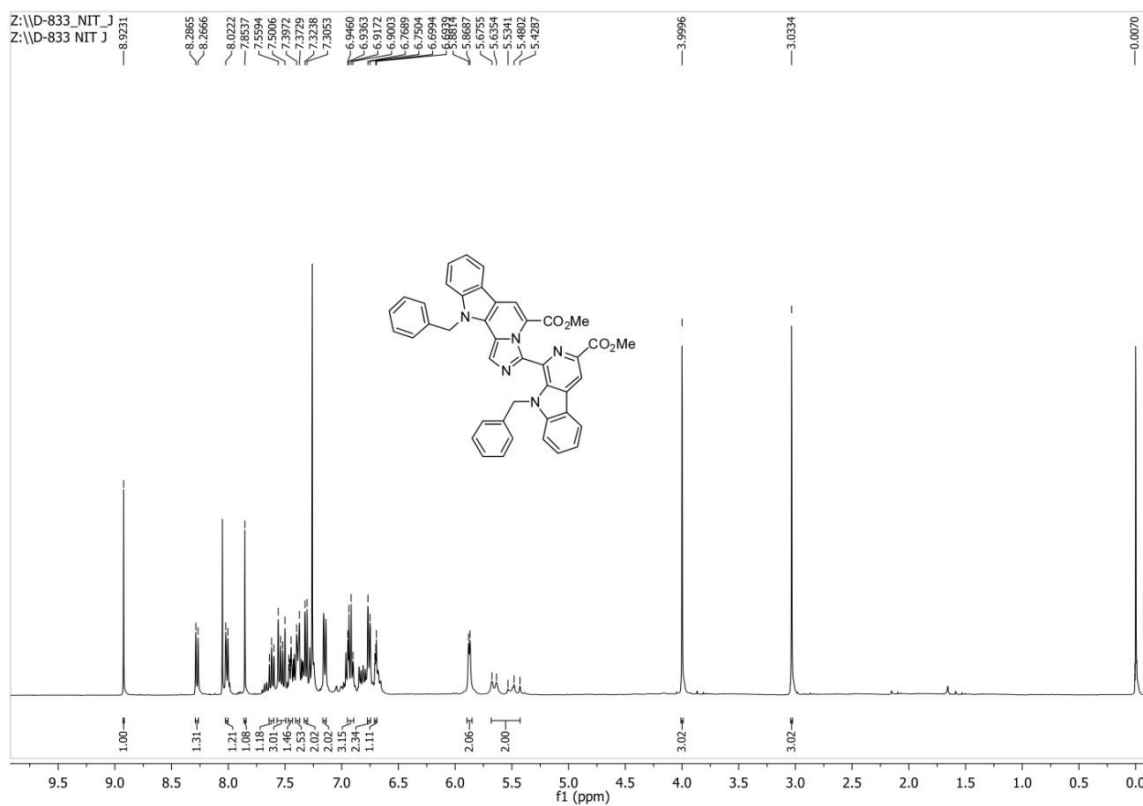Figure S12. <sup>1</sup>H-NMR spectrum of 4d.

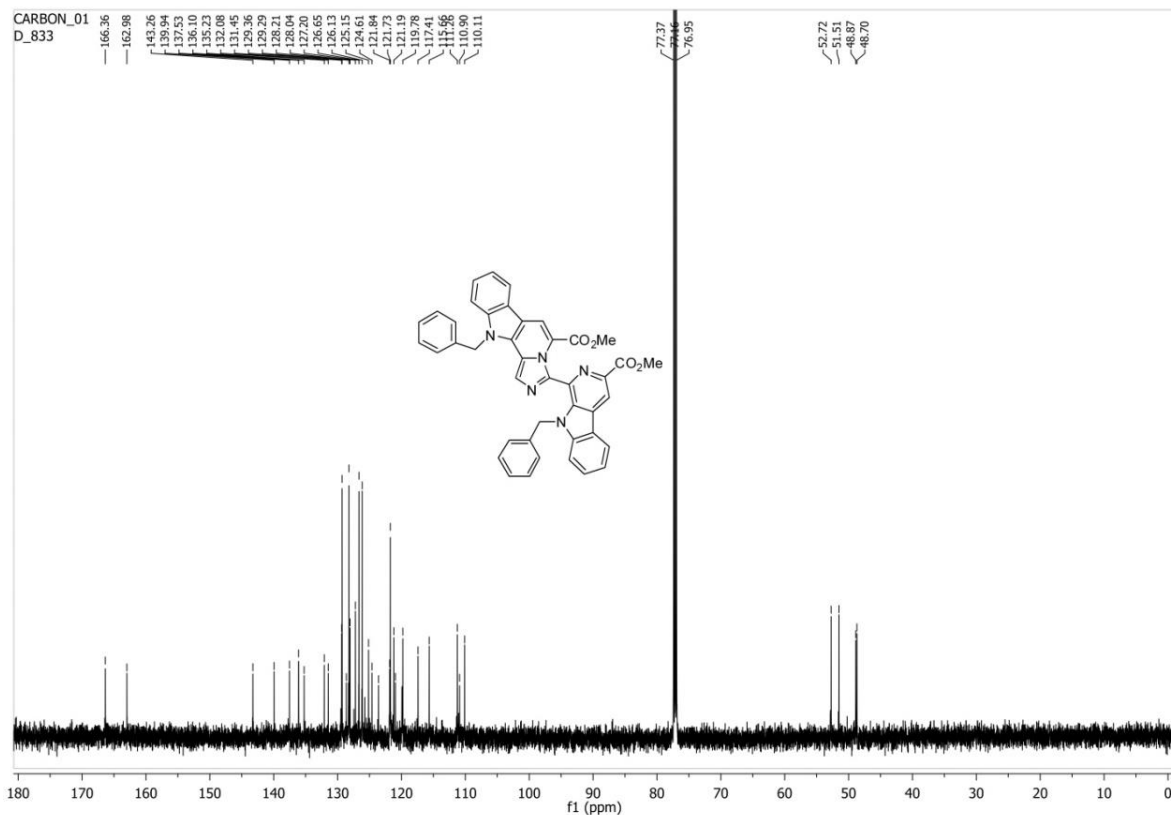

Figure S13.  $^{13}\text{C}$ -NMR spectrum of 4d.

Compound Table

| Compound Label       | RT  | Mass     | Formula       | MFG Formula   | MFG Diff (ppm) | DB Formula    |
|----------------------|-----|----------|---------------|---------------|----------------|---------------|
| Cpd 1: C42 H31 N5 O4 | 0.4 | 669.2389 | C42 H31 N5 O4 | C42 H31 N5 O4 | -1.91          | C42 H31 N5 O4 |

| Compound Label       | m/z      | RT  | Algorithm                 | Mass     |
|----------------------|----------|-----|---------------------------|----------|
| Cpd 1: C42 H31 N5 O4 | 670.2464 | 0.4 | Find by Molecular Feature | 669.2389 |

MFE MS Spectrum

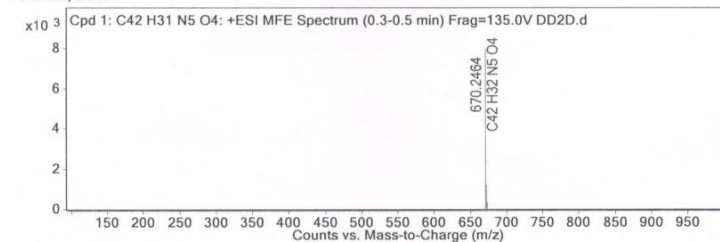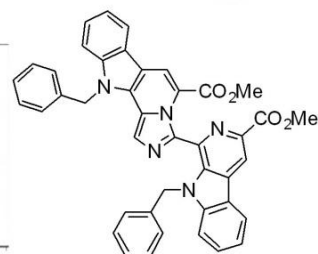

MS Spectrum Peak List

| m/z      | z | Abund   | Formula       | Ion    |
|----------|---|---------|---------------|--------|
| 670.2464 | 1 | 7985.72 | C42 H32 N5 O4 | (M+H)+ |
| 671.2486 | 1 | 3716.2  | C42 H32 N5 O4 | (M+H)+ |
| 672.2542 | 1 | 1220.19 | C42 H32 N5 O4 | (M+H)+ |
| 673.2486 | 1 | 309.06  | C42 H32 N5 O4 | (M+H)+ |

Predicted Isotope Match Table

| Isotope | m/z      | Calc m/z | Diff (ppm) | Abund % | Calc Abund % | Abund Sum % | Calc Abund Sum % |
|---------|----------|----------|------------|---------|--------------|-------------|------------------|
| 1       | 670.2464 | 670.2449 | -2.33      | 100     | 100          | 60.36       | 61.79            |
| 2       | 671.2486 | 671.248  | -0.86      | 46.54   | 47.77        | 28.09       | 29.52            |
| 3       | 672.2542 | 672.251  | -4.76      | 15.28   | 11.98        | 9.22        | 7.4              |
| 4       | 673.2486 | 673.2539 | 7.88       | 3.87    | 2.09         | 2.34        | 1.29             |

--- End Of Report ---

Figure S14. HRMS spectrum of 4d.

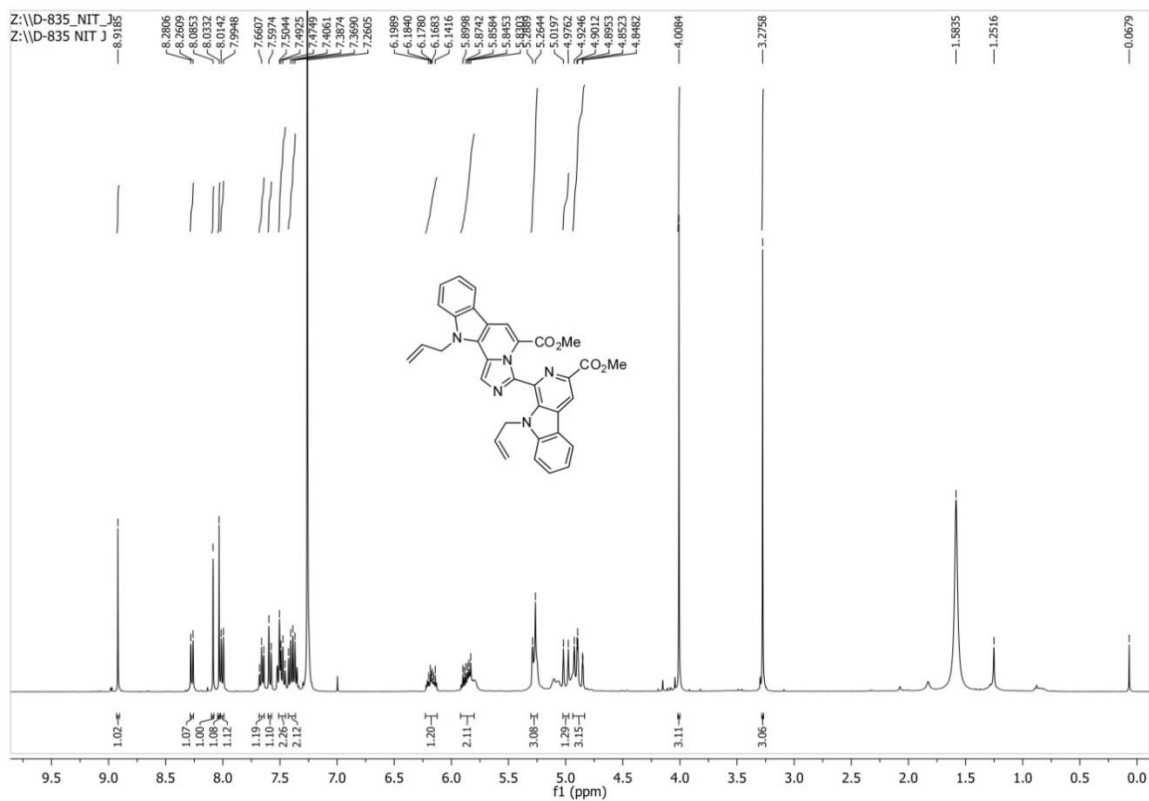

Figure S15. <sup>1</sup>H-NMR spectrum of **4e**.

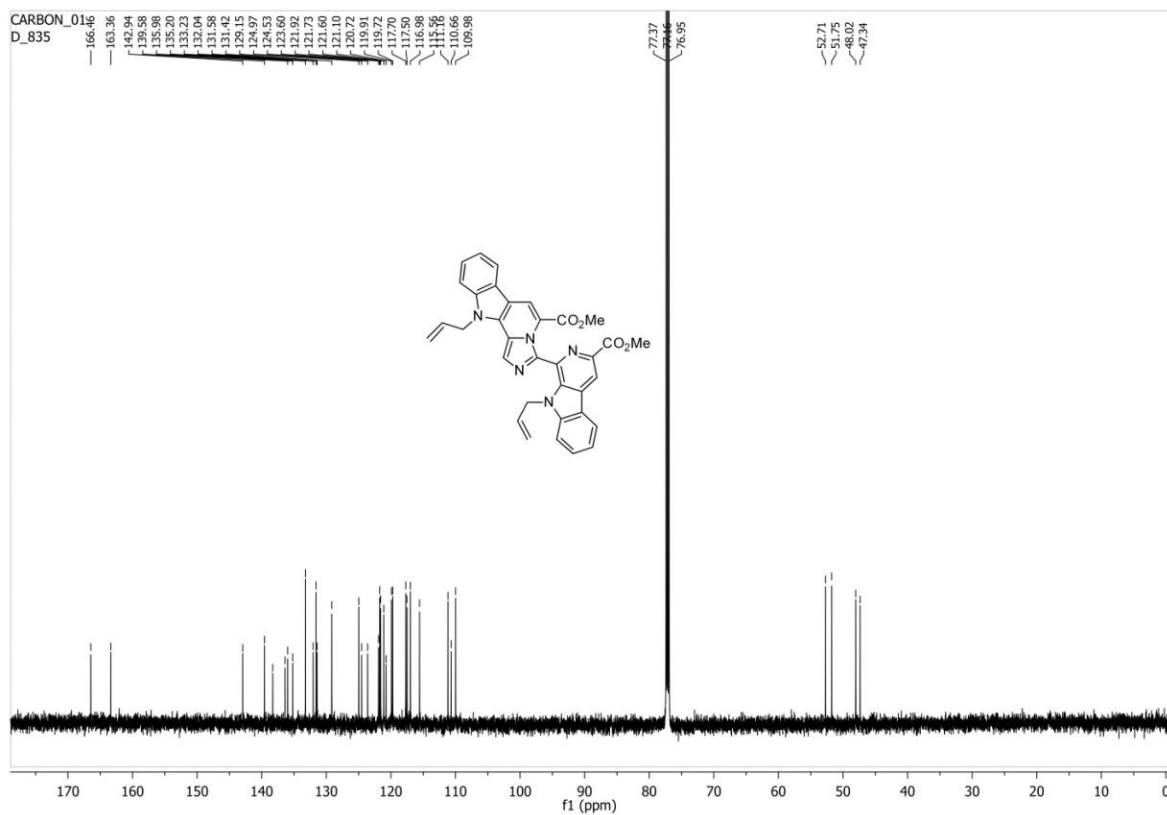

Figure S16. <sup>13</sup>C-NMR spectrum of **4e**.

# Compound Table

| Compound Label       | RT  | Mass     | Formula       | MFG Formula   | MFG Diff (ppm) | DB Formula    |
|----------------------|-----|----------|---------------|---------------|----------------|---------------|
| Cpd 1: C34 H27 N5 O4 | 0.4 | 569.2015 | C34 H27 N5 O4 | C34 H27 N5 O4 | 8.5            | C34 H27 N5 O4 |

| Compound Label       | m/z      | RT  | Algorithm                 | Mass     |
|----------------------|----------|-----|---------------------------|----------|
| Cpd 1: C34 H27 N5 O4 | 570.2088 | 0.4 | Find by Molecular Feature | 569.2015 |

## MFE MS Spectrum

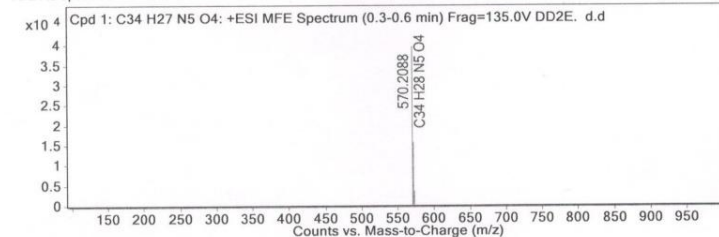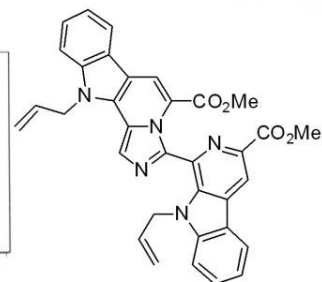

## MS Spectrum Peak List

| m/z      | z | Abund    | Formula       | Ion    |
|----------|---|----------|---------------|--------|
| 570.2088 | 1 | 39675.48 | C34 H28 N5 O4 | (M+H)+ |
| 571.2121 | 1 | 15684.42 | C34 H28 N5 O4 | (M+H)+ |
| 572.2137 | 1 | 3580.66  | C34 H28 N5 O4 | (M+H)+ |
| 573.2166 | 1 | 656.53   | C34 H28 N5 O4 | (M+H)+ |

## Predicted Isotope Match Table

| Isotope | m/z      | Calc m/z | Diff (ppm) | Abund % | Calc Abund % | Abund Sum % | Calc Abund Sum % |
|---------|----------|----------|------------|---------|--------------|-------------|------------------|
| 1       | 570.2088 | 570.2136 | 8.45       | 100     | 100          | 66.57       | 67.31            |
| 2       | 571.2121 | 571.2167 | 8.08       | 39.53   | 39.07        | 26.32       | 26.3             |
| 3       | 572.2137 | 572.2196 | 10.32      | 9.02    | 8.25         | 6.01        | 5.56             |
| 4       | 573.2166 | 573.2223 | 9.97       | 1.65    | 1.24         | 1.1         | 0.83             |

--- End Of Report ---

Figure S17. HRMS spectrum of 4e.

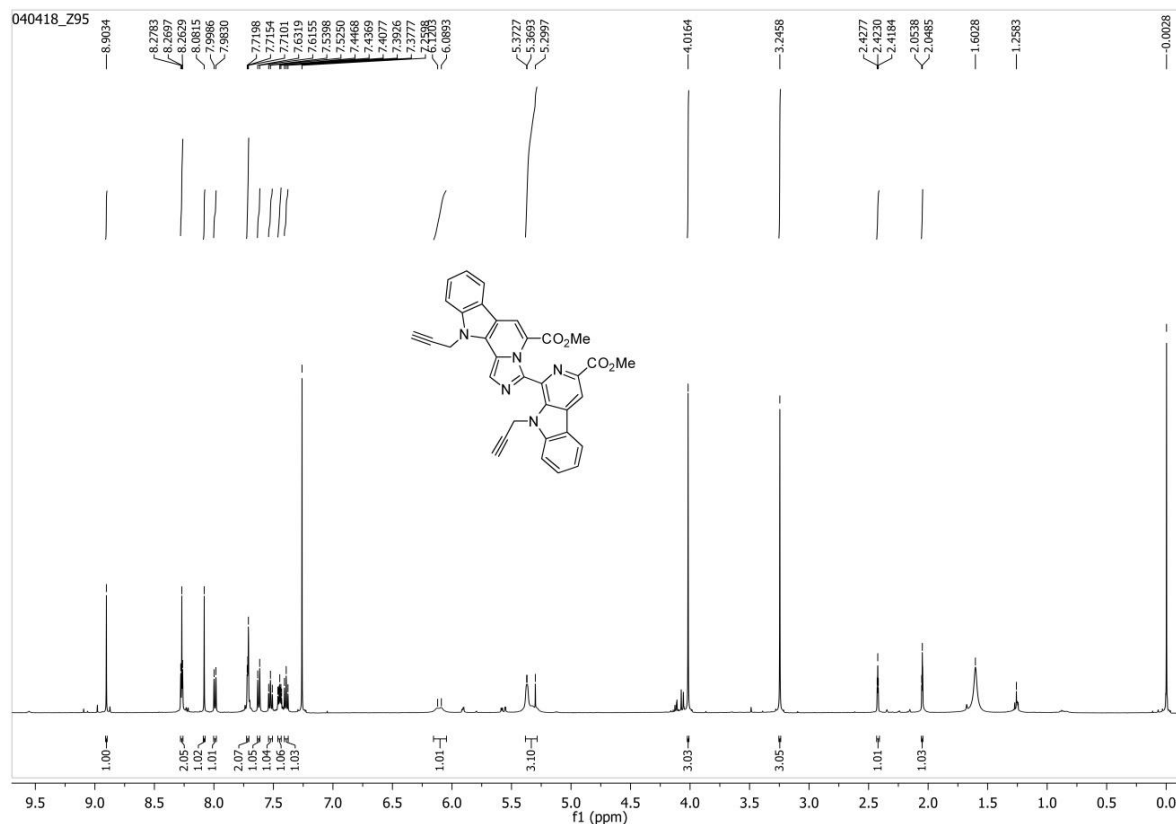



Figure S18.  $^1\text{H}$ -NMR spectrum of **4f**.

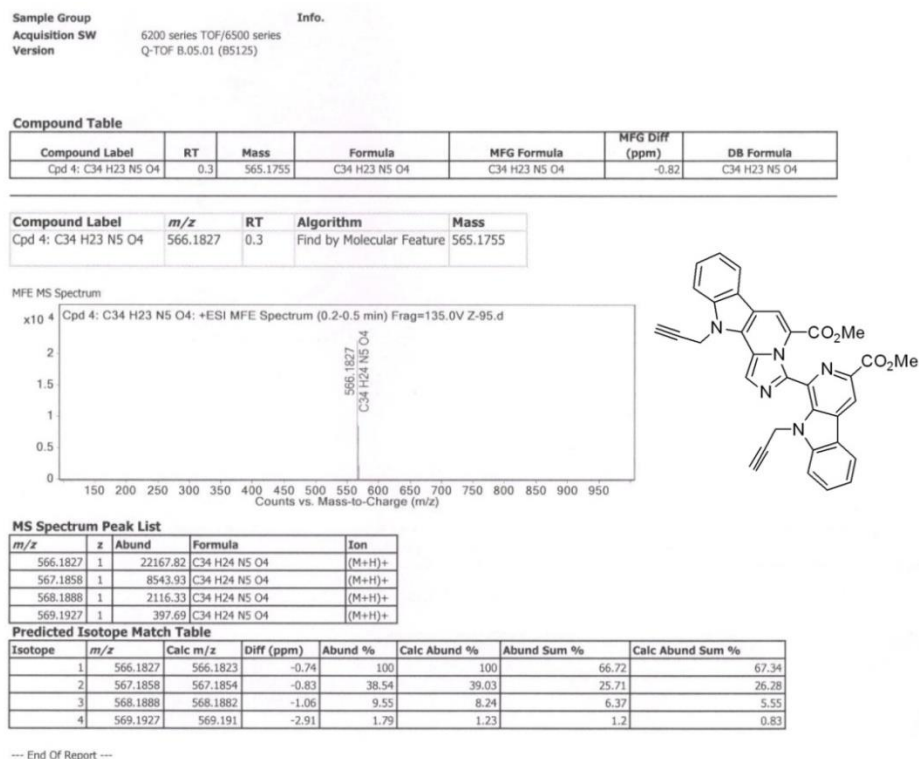

Figure S19. HRMS spectrum of **4f**.

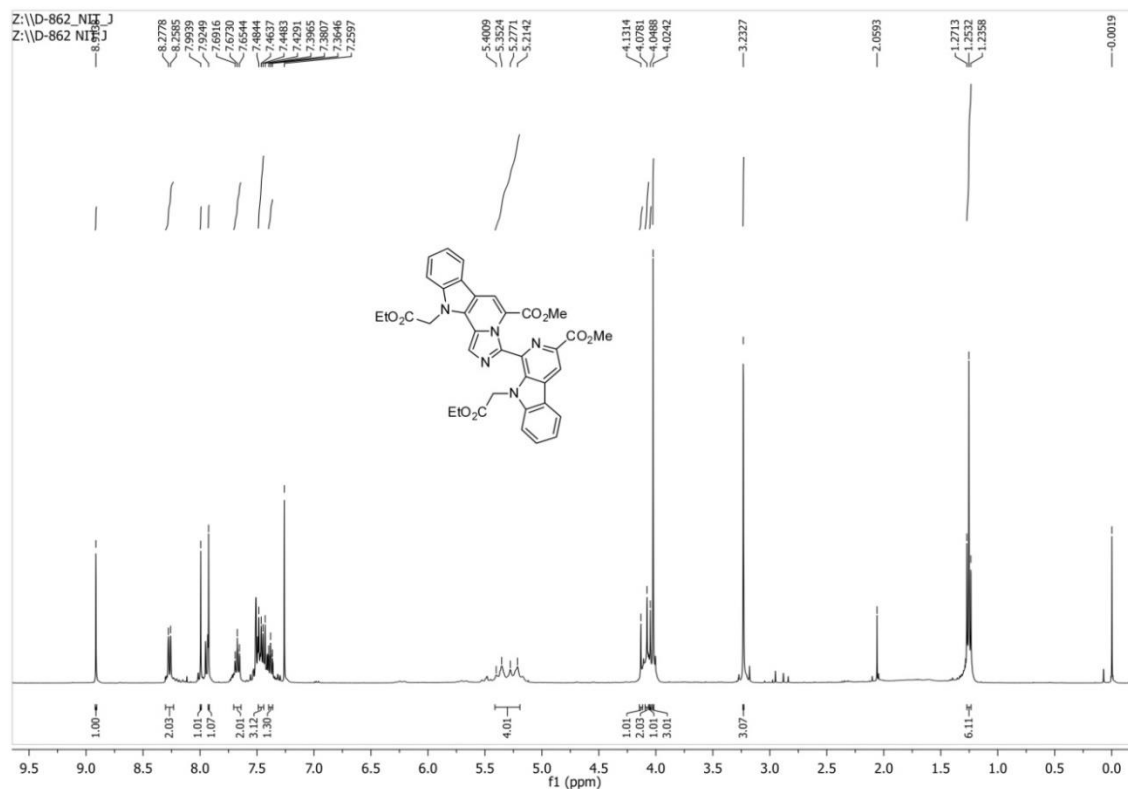

Figure S20.  $^1\text{H}$ -NMR spectrum of **4g**.



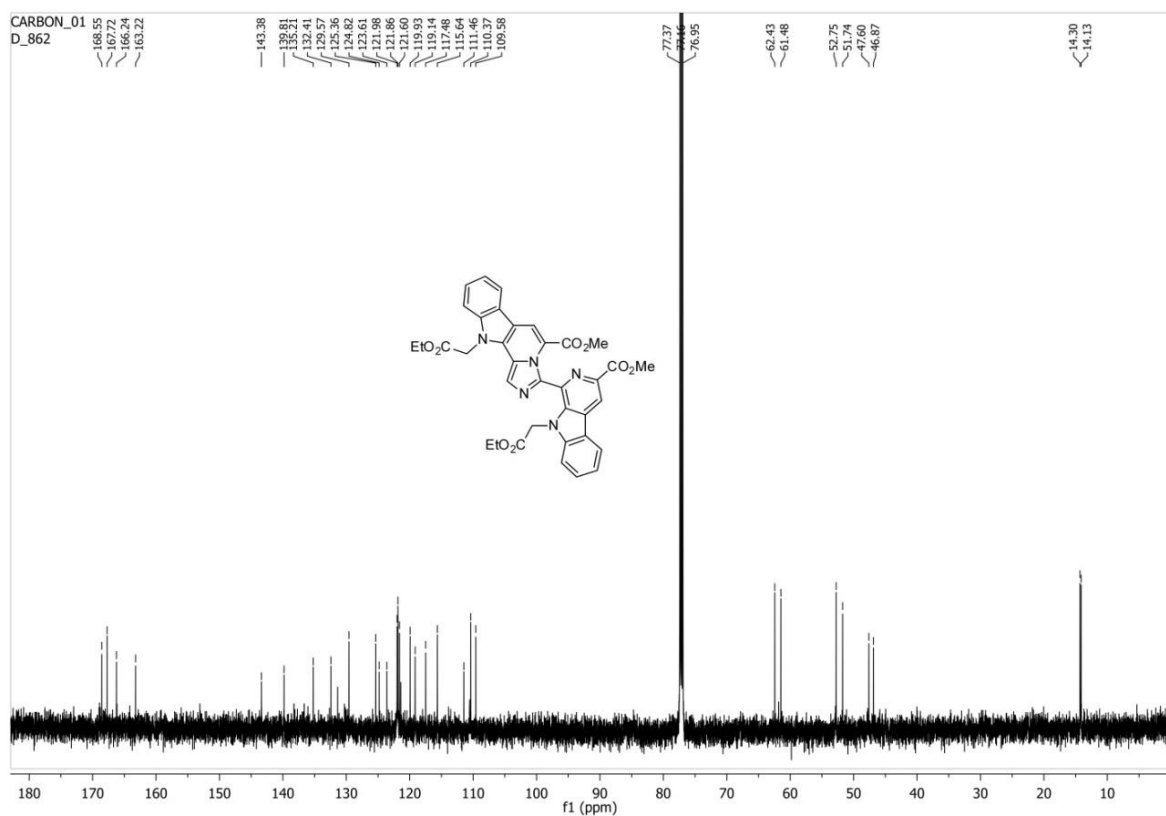

Figure S21.  $^{13}\text{C}$ -NMR spectrum of **4g**.

#### Compound Table

| Compound Label       | RT  | Mass     | Formula       | MFG Formula   | MFG Diff (ppm) | DB Formula    |
|----------------------|-----|----------|---------------|---------------|----------------|---------------|
| Cpd 3: C36 H31 N5 O8 | 0.4 | 661.2172 | C36 H31 N5 O8 | C36 H31 N5 O8 | 0.06           | C36 H31 N5 O8 |

| Compound Label       | $m/z$    | RT  | Algorithm                 | Mass     |
|----------------------|----------|-----|---------------------------|----------|
| Cpd 3: C36 H31 N5 O8 | 662.2243 | 0.4 | Find by Molecular Feature | 661.2172 |

#### MFE MS Spectrum

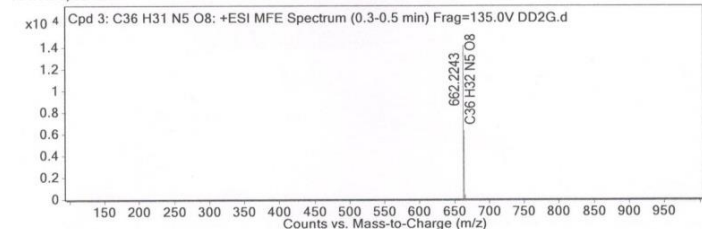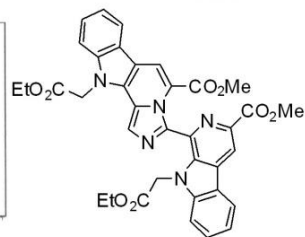

#### MS Spectrum Peak List

| $m/z$    | z | Abund    | Formula       | Ion    |
|----------|---|----------|---------------|--------|
| 662.2243 | 1 | 14199.84 | C36 H32 N5 O8 | (M+H)+ |
| 663.2275 | 1 | 6318.96  | C36 H32 N5 O8 | (M+H)+ |
| 664.2314 | 1 | 1476.41  | C36 H32 N5 O8 | (M+H)+ |
| 665.2374 | 1 | 405.01   | C36 H32 N5 O8 | (M+H)+ |

#### Predicted Isotope Match Table

| Isotope | $m/z$    | Calc $m/z$ | Diff (ppm) | Abund % | Calc Abund % | Abund Sum % | Calc Abund Sum % |
|---------|----------|------------|------------|---------|--------------|-------------|------------------|
| 1       | 662.2243 | 662.2245   | 0.36       | 100     | 100          | 63.39       | 65.26            |
| 2       | 663.2275 | 663.2276   | 0.16       | 44.5    | 41.44        | 28.21       | 27.04            |
| 3       | 664.2314 | 664.2304   | -1.44      | 10.4    | 10.01        | 6.59        | 6.54             |
| 4       | 665.2374 | 665.2331   | -6.52      | 2.85    | 1.78         | 1.81        | 1.16             |

--- End Of Report ---

Figure S22. HRMS spectrum of **4g**.

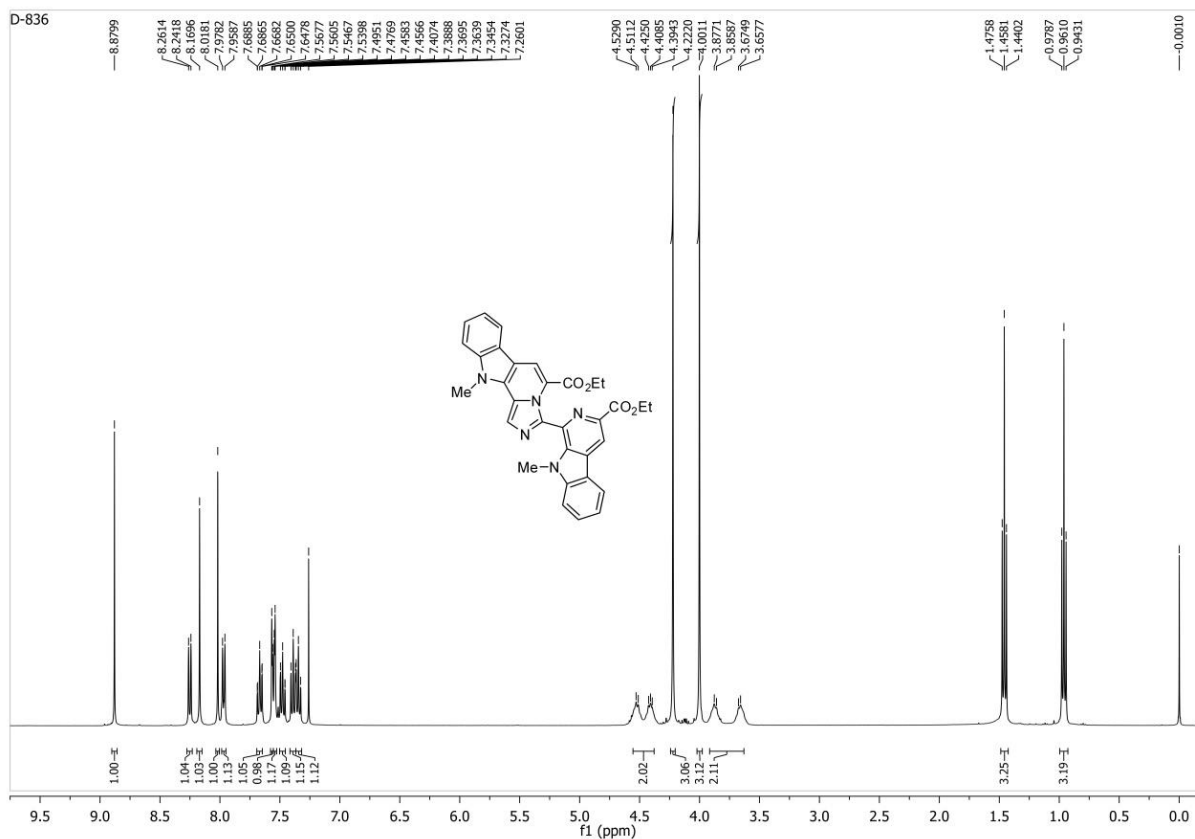

Figure S23.  $^1\text{H}$ -NMR spectrum of 4h.

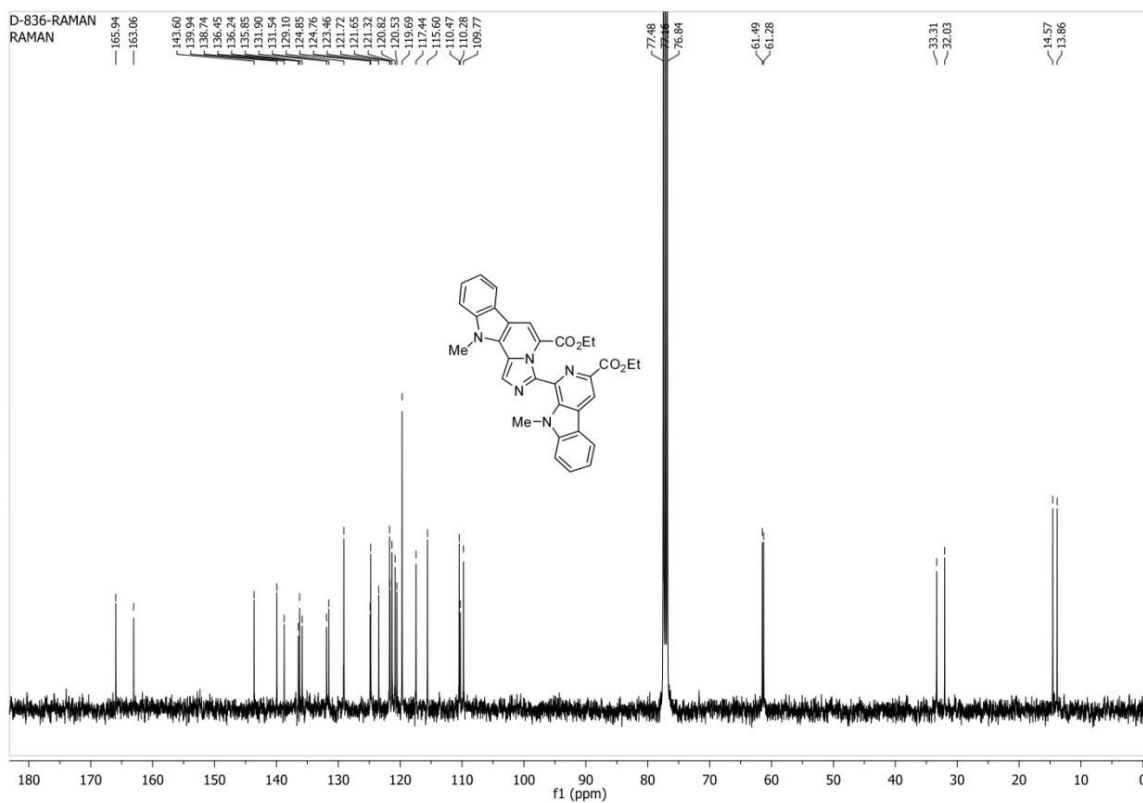

**Figure S24.**  $^{13}\text{C}$ -NMR spectrum of **4h**.

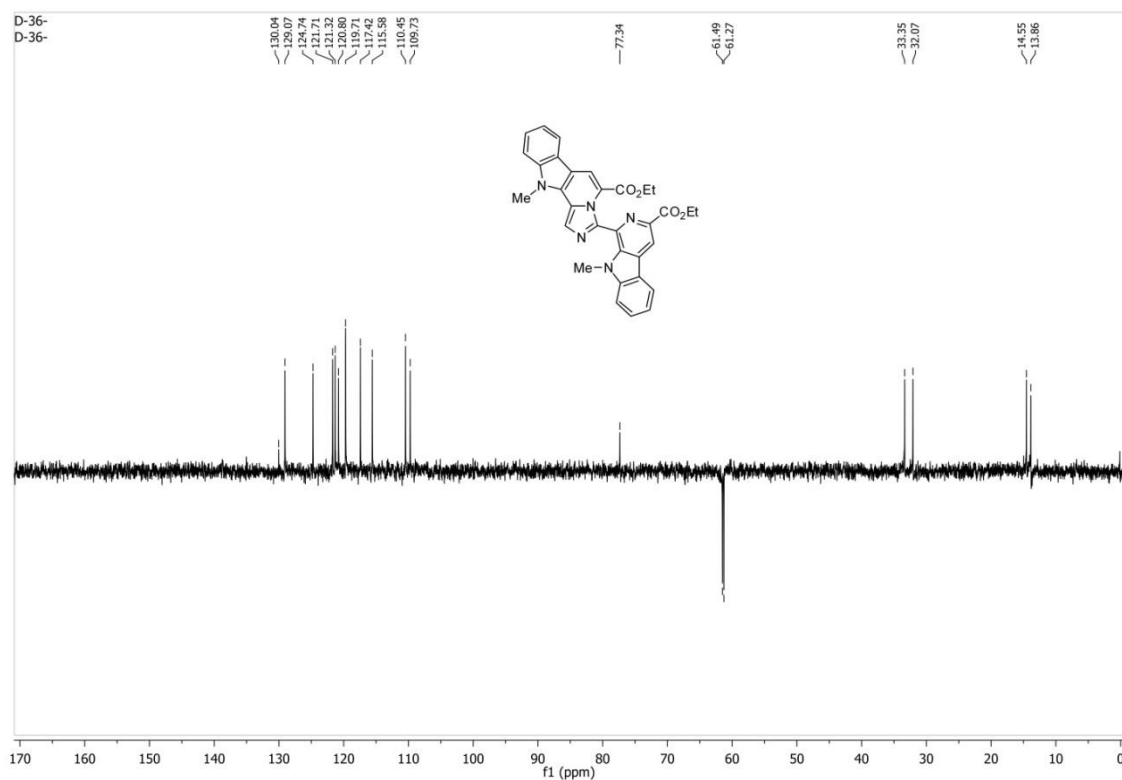

**Figure S25.** DEPT-135 NMR spectrum of **4h**.

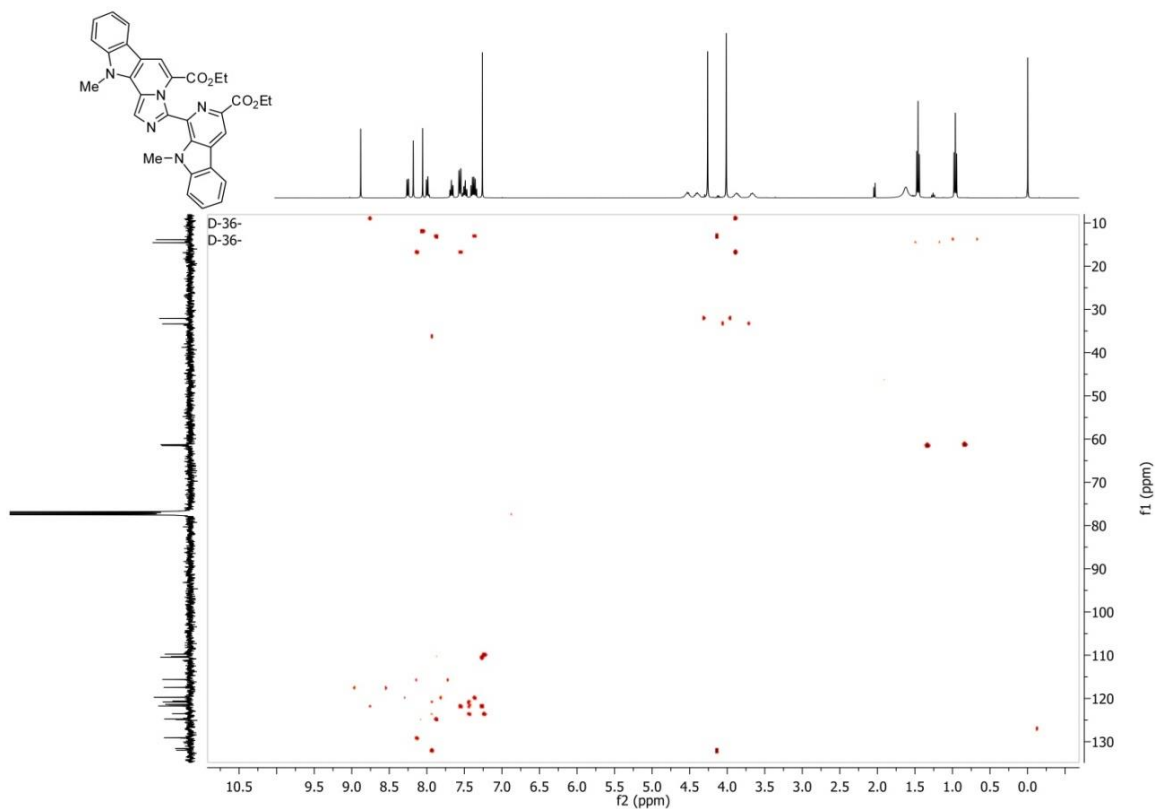

**Figure S26.** HMBC NMR spectrum of **4h**.

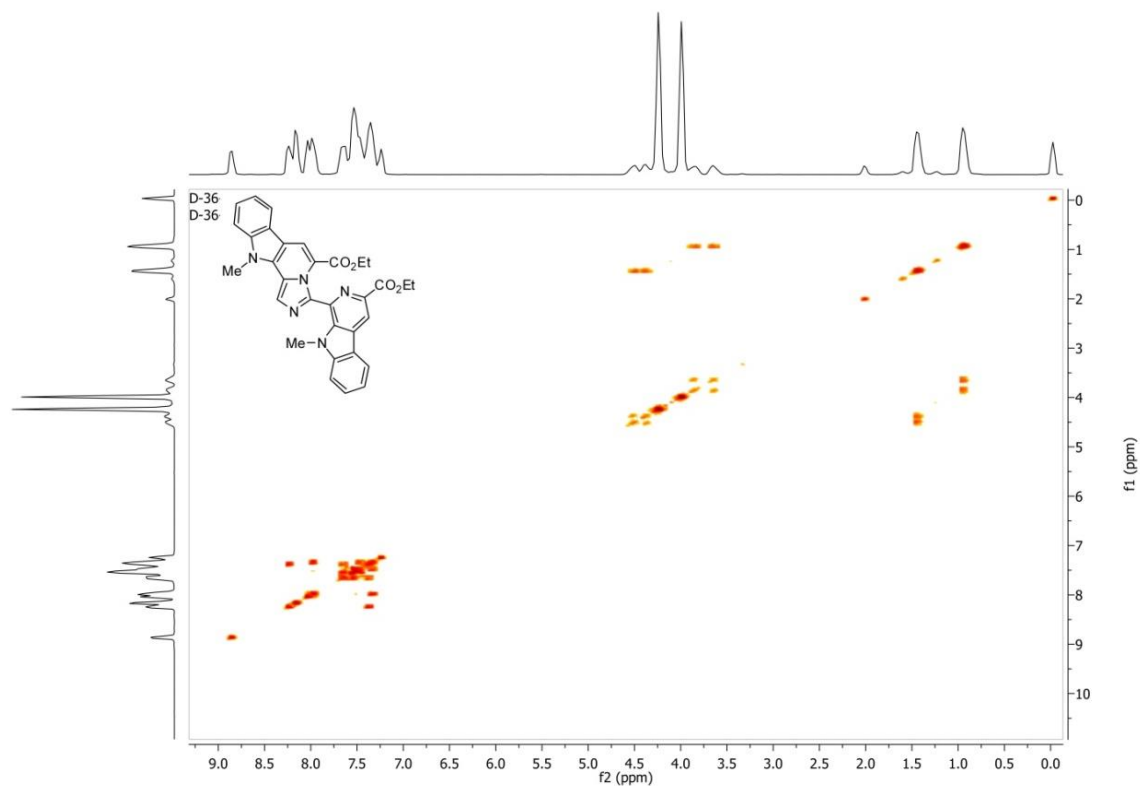

Figure S27. COSY NMR spectrum of 4h.

Compound Table

| Compound Label        | RT  | Mass     | Formula       | MFG Formula   | MFG Diff (ppm) | DB Formula    |
|-----------------------|-----|----------|---------------|---------------|----------------|---------------|
| Cpd 27: C32 H27 N5 O4 | 0.4 | 545.2039 | C32 H27 N5 O4 | C32 H27 N5 O4 | 4.47           | C32 H27 N5 O4 |

| Compound Label        | m/z     | RT  | Algorithm                 | Mass     |
|-----------------------|---------|-----|---------------------------|----------|
| Cpd 27: C32 H27 N5 O4 | 546.211 | 0.4 | Find by Molecular Feature | 545.2039 |

MFE MS Spectrum

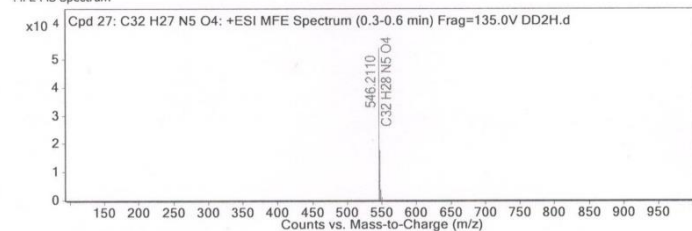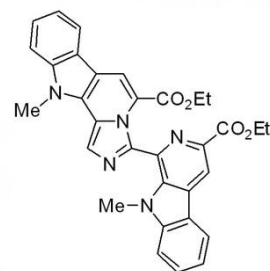

MS Spectrum Peak List

| m/z      | z | Abund    | Formula       | Ion    |
|----------|---|----------|---------------|--------|
| 546.211  | 1 | 54050.86 | C32 H28 N5 O4 | (M+H)+ |
| 547.2142 | 1 | 17570.94 | C32 H28 N5 O4 | (M+H)+ |
| 548.2184 | 1 | 3813.23  | C32 H28 N5 O4 | (M+H)+ |
| 549.222  | 1 | 825.8    | C32 H28 N5 O4 | (M+H)+ |

Predicted Isotope Match Table

| Isotope | m/z      | Calc m/z | Diff (ppm) | Abund % | Calc Abund % | Abund Sum % | Calc Abund Sum % |
|---------|----------|----------|------------|---------|--------------|-------------|------------------|
| 1       | 546.211  | 546.2136 | 4.71       | 100     | 100          | 70.88       | 68.76            |
| 2       | 547.2142 | 547.2167 | 4.4        | 32.51   | 36.91        | 23.04       | 25.38            |
| 3       | 548.2184 | 548.2195 | 1.97       | 7.05    | 7.44         | 5           | 5.12             |
| 4       | 549.222  | 549.2222 | 0.42       | 1.53    | 1.07         | 1.08        | 0.74             |

--- End Of Report ---

Figure S28. HRMS spectrum of 4h.

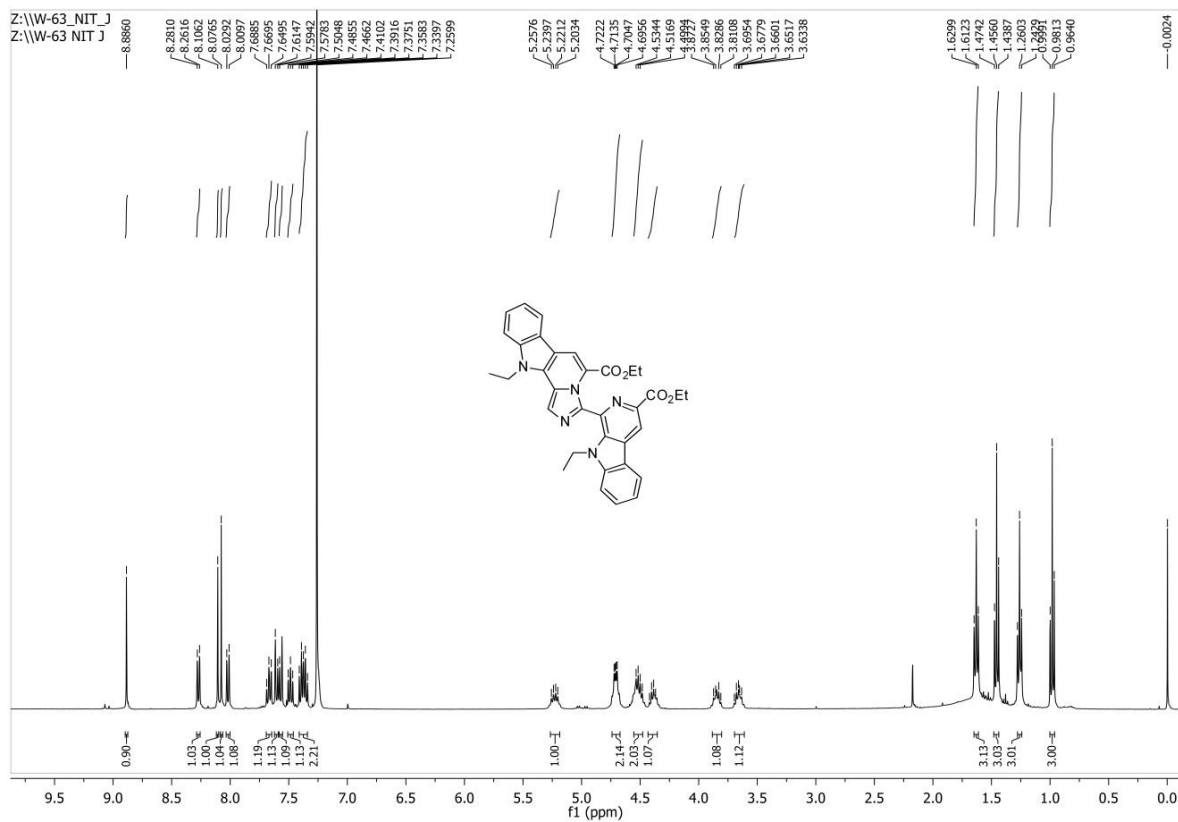

Figure S29.  $^1\text{H}$ -NMR spectrum of 4i.

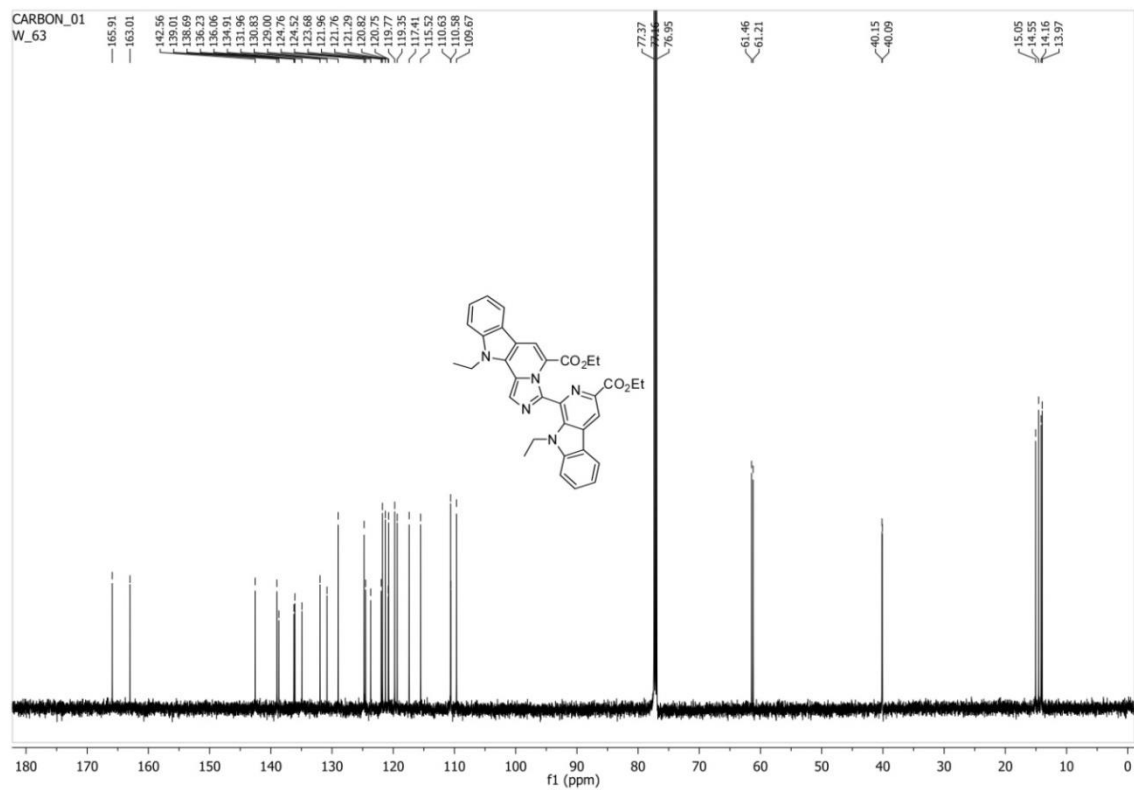

Figure S30.  $^{13}\text{C}$ -NMR spectrum of 4i.

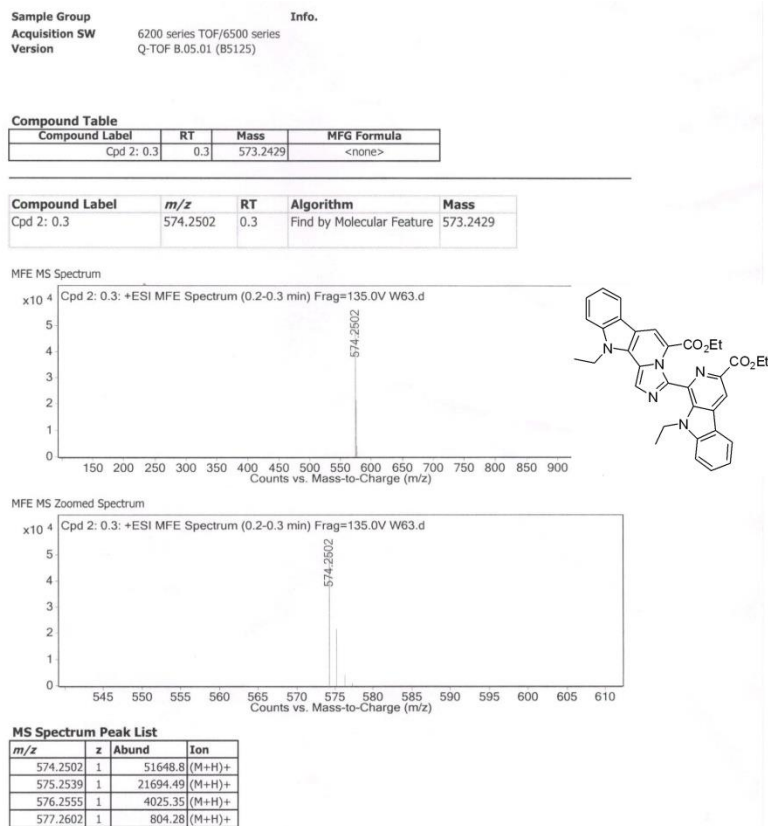

Figure S31. HRMS spectrum of 4i.

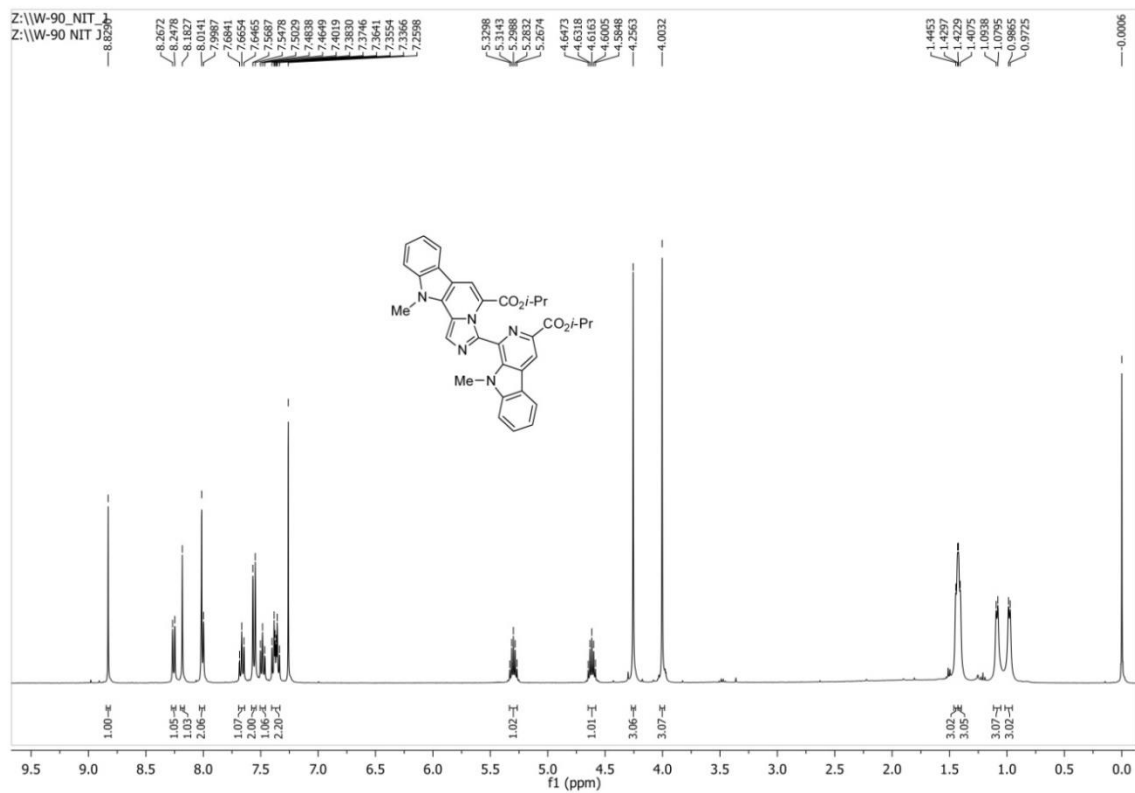

Figure S32. <sup>1</sup>H-NMR spectrum of 4j.

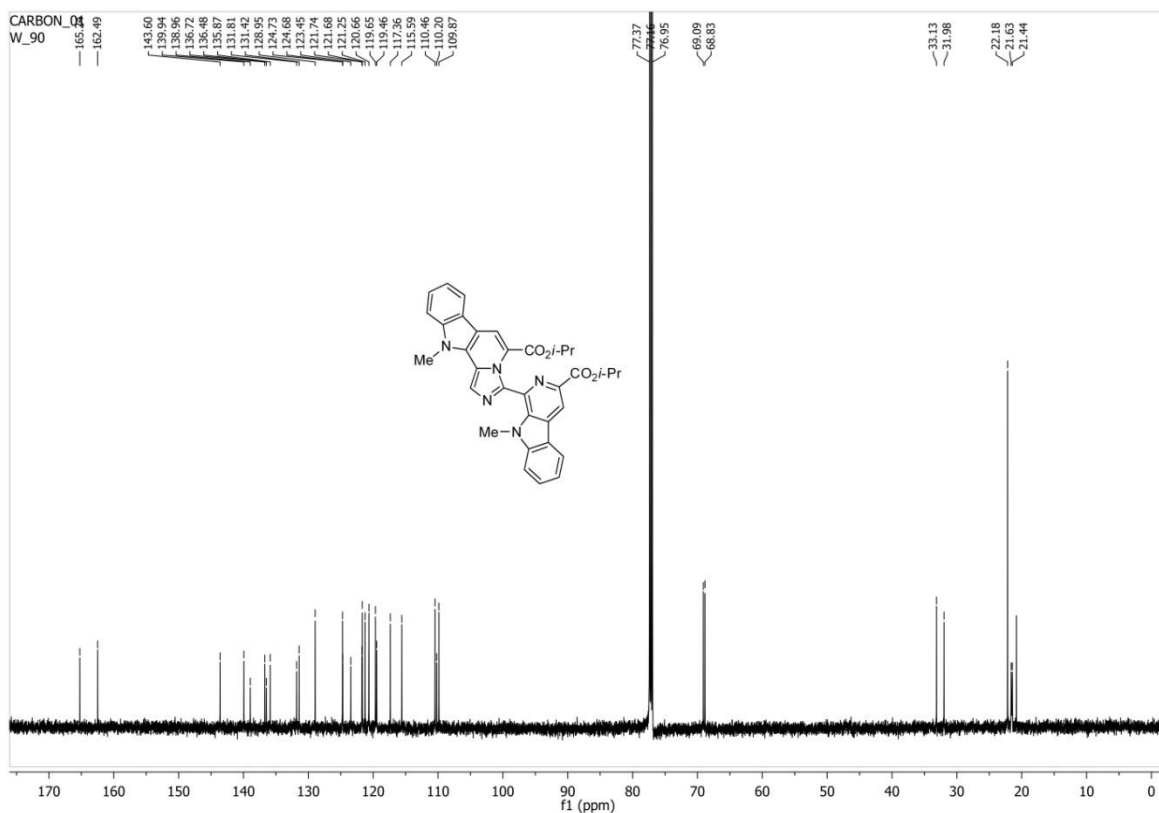

Figure S33.  $^{13}\text{C}$ -NMR spectrum of 4j.

Sample Group  
Acquisition SW  
Version

Info.  
6200 series TOF/6500 series  
Q-TOF B.05.01 (B5125)

#### Compound Table

| Compound Label       | RT  | Mass     | Formula       | MFG Formula   | MFG Diff (ppm) | DB Formula    |
|----------------------|-----|----------|---------------|---------------|----------------|---------------|
| Cpd 2: C34 H31 N5 O4 | 0.3 | 573.2379 | C34 H31 N5 O4 | C34 H31 N5 O4 | -0.47          | C34 H31 N5 O4 |

| Compound Label       | m/z      | RT  | Algorithm                 | Mass     |
|----------------------|----------|-----|---------------------------|----------|
| Cpd 2: C34 H31 N5 O4 | 574.2452 | 0.3 | Find by Molecular Feature | 573.2379 |

#### MFE MS Spectrum

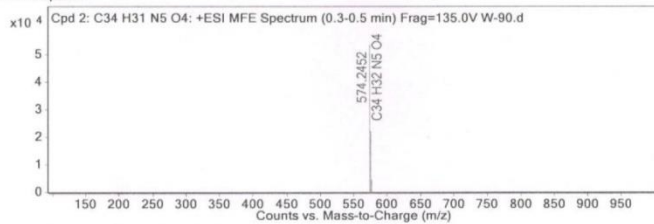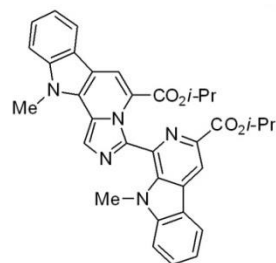

#### MS Spectrum Peak List

| m/z      | z | Abund    | Formula       | Ion    |
|----------|---|----------|---------------|--------|
| 574.2452 | 1 | 53664.93 | C34 H32 N5 O4 | (M+H)+ |
| 575.2481 | 1 | 22212.83 | C34 H32 N5 O4 | (M+H)+ |
| 576.2519 | 1 | 4645.22  | C34 H32 N5 O4 | (M+H)+ |
| 577.2521 | 1 | 863.39   | C34 H32 N5 O4 | (M+H)+ |

#### Predicted Isotope Match Table

| Isotope | m/z      | Calc m/z | Diff (ppm) | Abund % | Calc Abund % | Abund Sum % | Calc Abund Sum % |
|---------|----------|----------|------------|---------|--------------|-------------|------------------|
| 1       | 574.2452 | 574.2449 | -0.48      | 100     | 100          | 65.94       | 67.28            |
| 2       | 575.2481 | 575.248  | -0.27      | 41.39   | 39.12        | 27.29       | 26.32            |
| 3       | 576.2519 | 576.2509 | -1.81      | 8.66    | 8.27         | 5.71        | 5.57             |
| 4       | 577.2521 | 577.2536 | 2.6        | 1.61    | 1.24         | 1.06        | 0.84             |

--- End Of Report ---

Figure S34. HRMS spectrum of 4j.

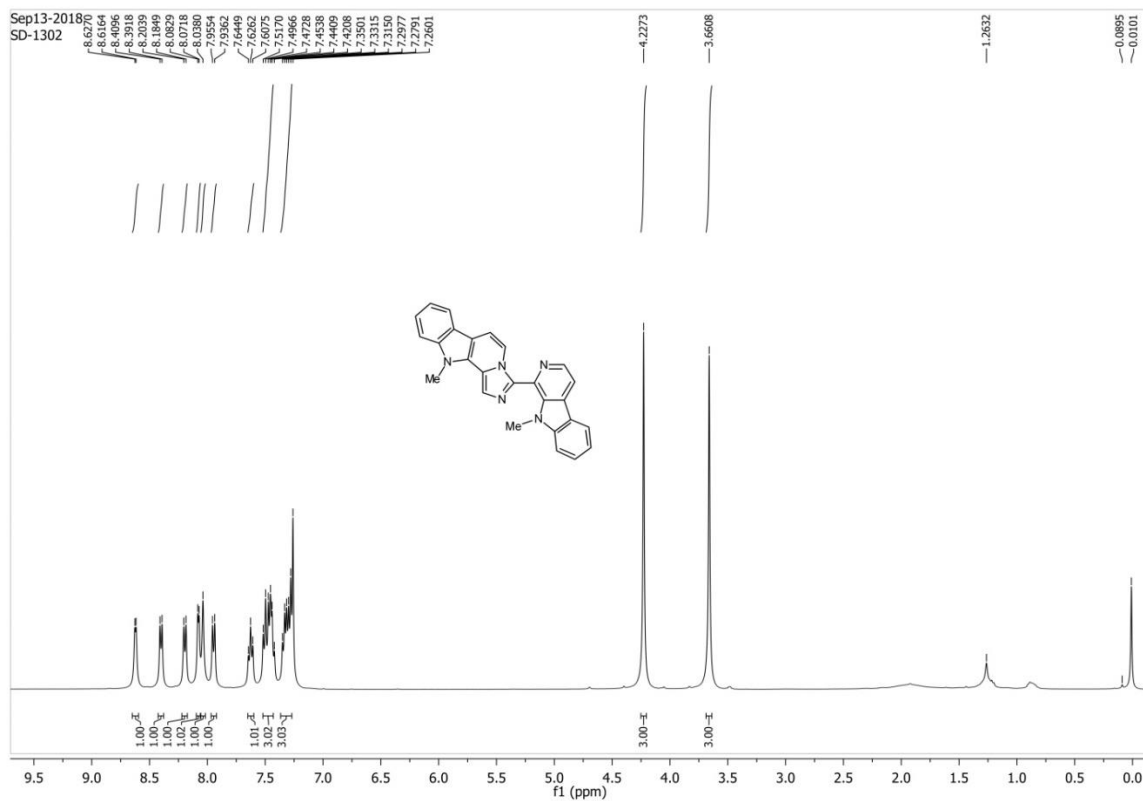

Figure S35.  $^1\text{H}$ -NMR spectrum of 4k.

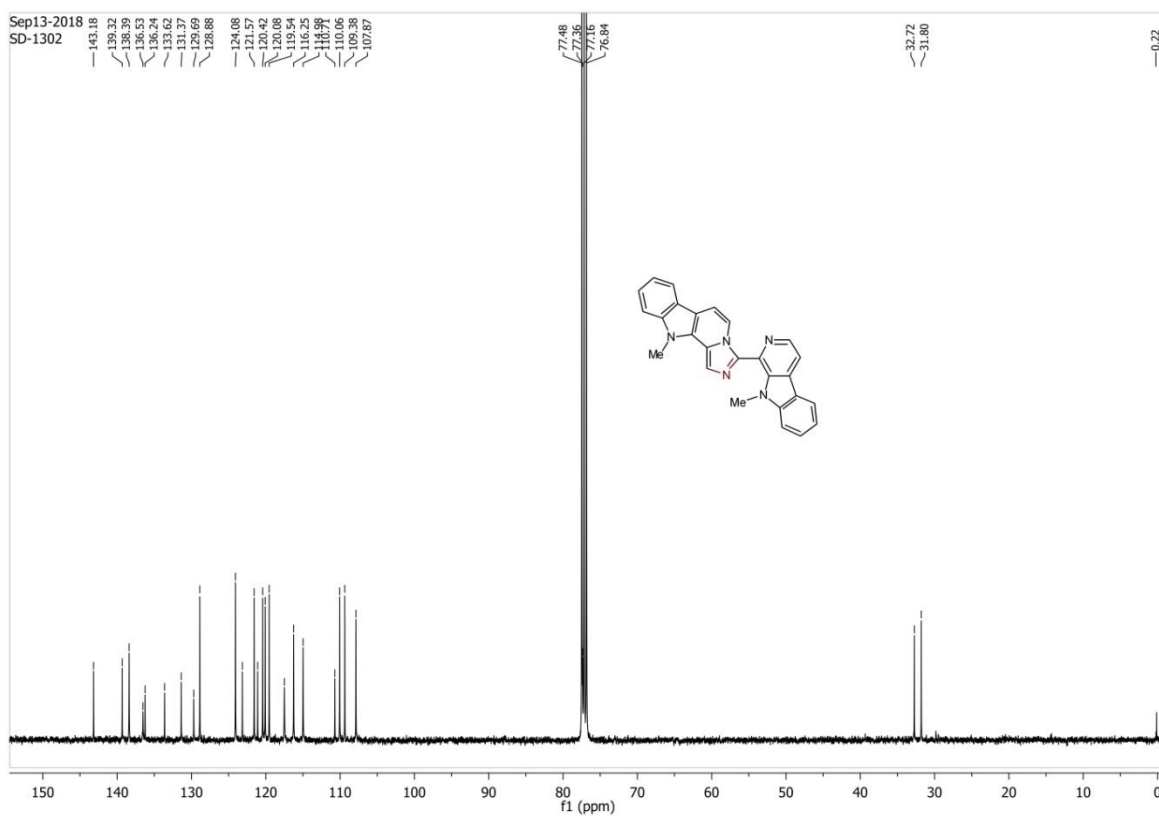

Figure S36.  $^{13}\text{C}$ -NMR spectrum of 4k.



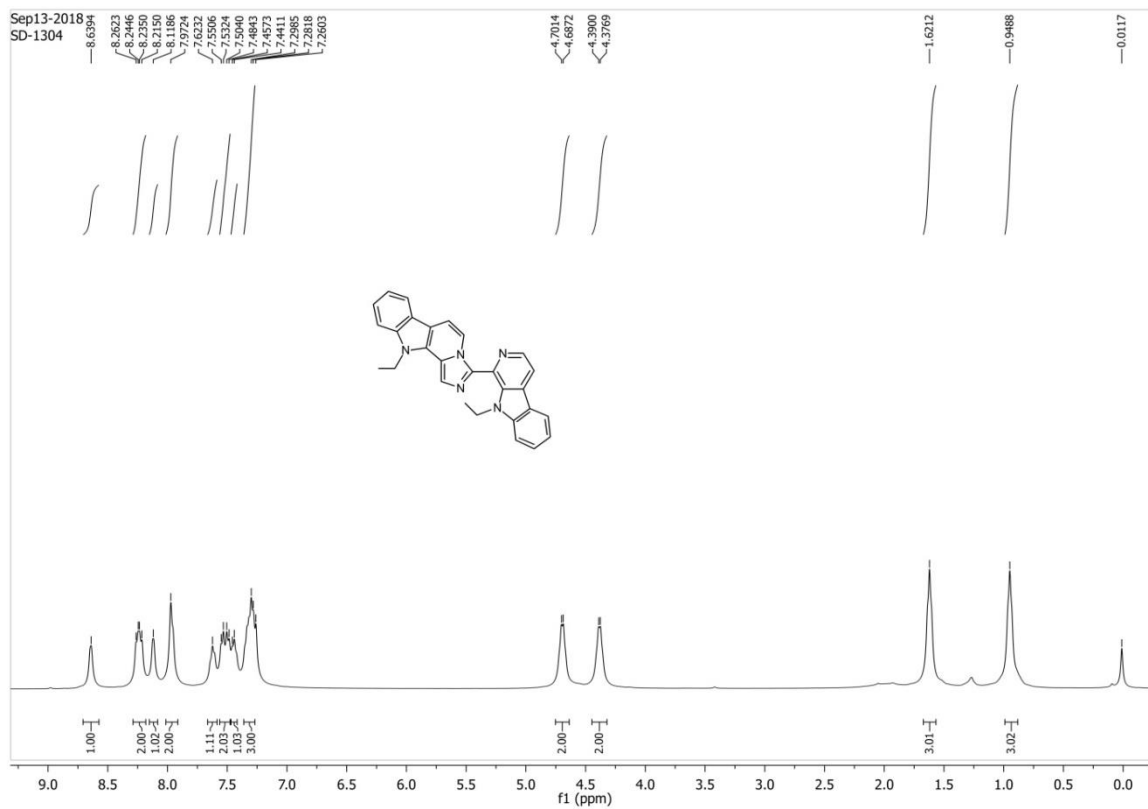

Figure S37.  $^1\text{H}$ -NMR spectrum of 4l.

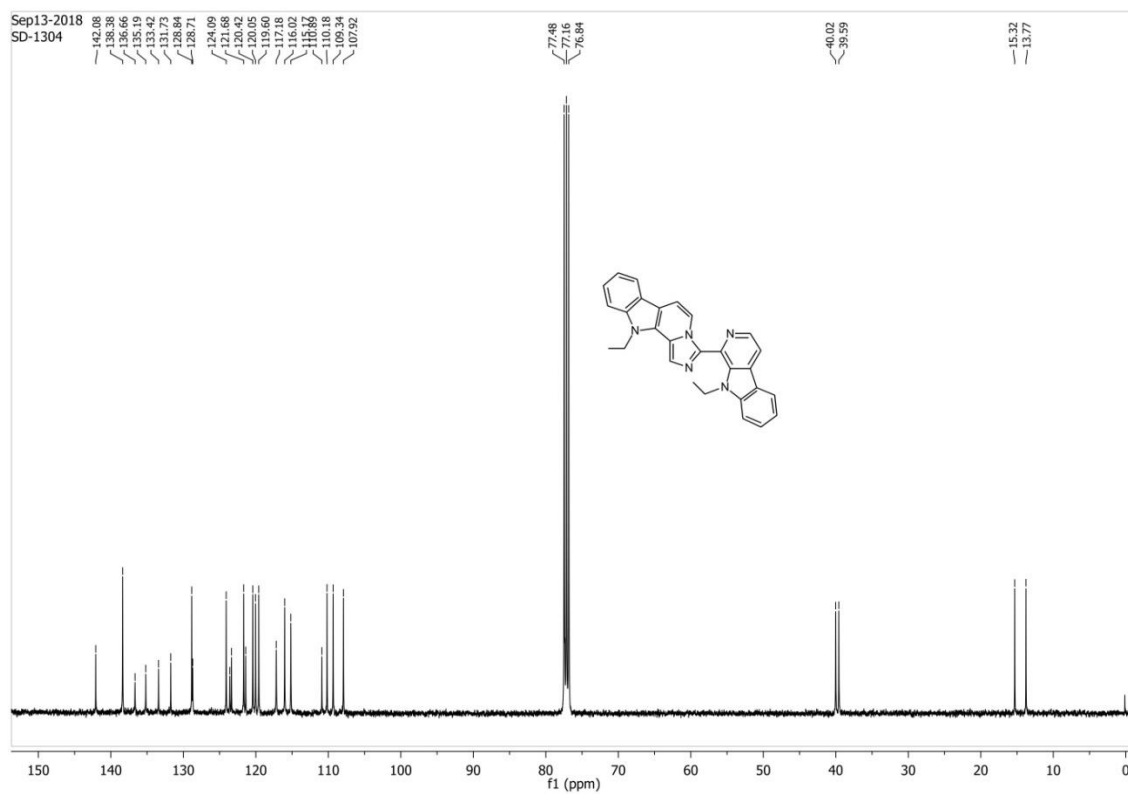

Figure S38.  $^{13}\text{C}$ -NMR spectrum of 4l.

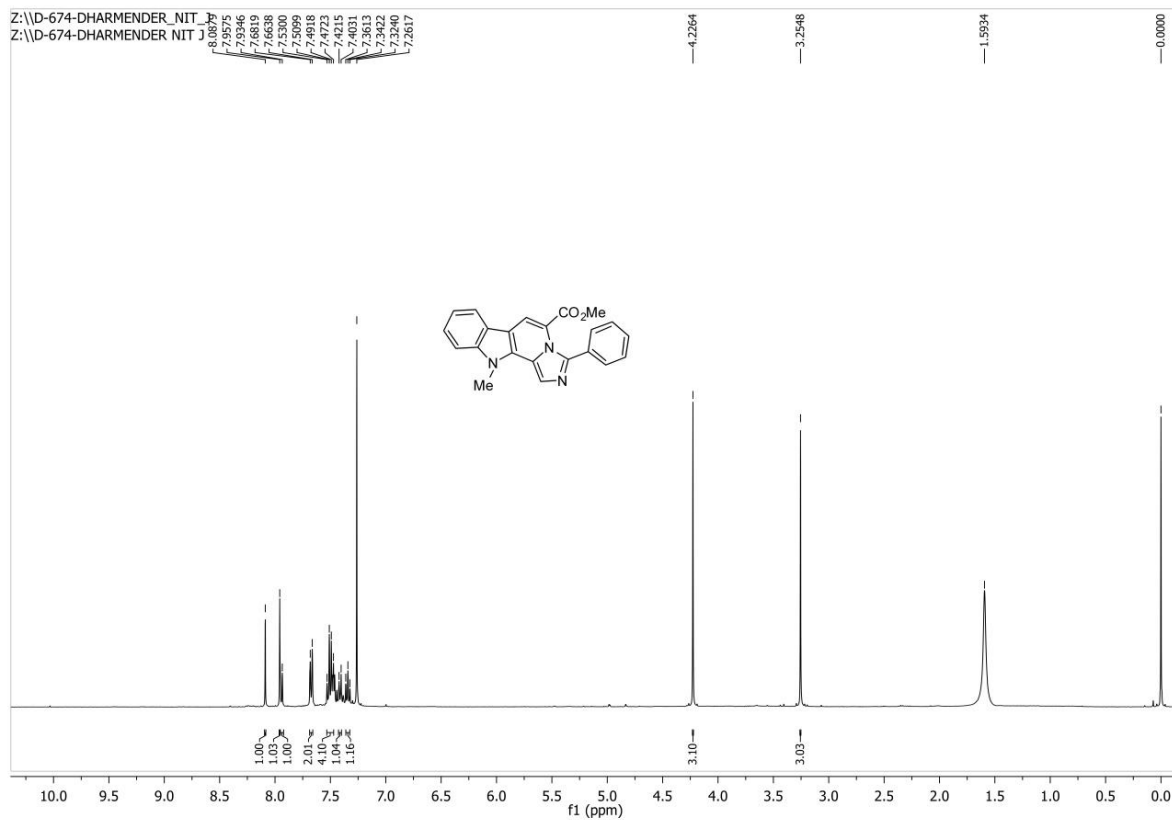

Figure S39.  $^1\text{H}$ -NMR spectrum of **1aA**.

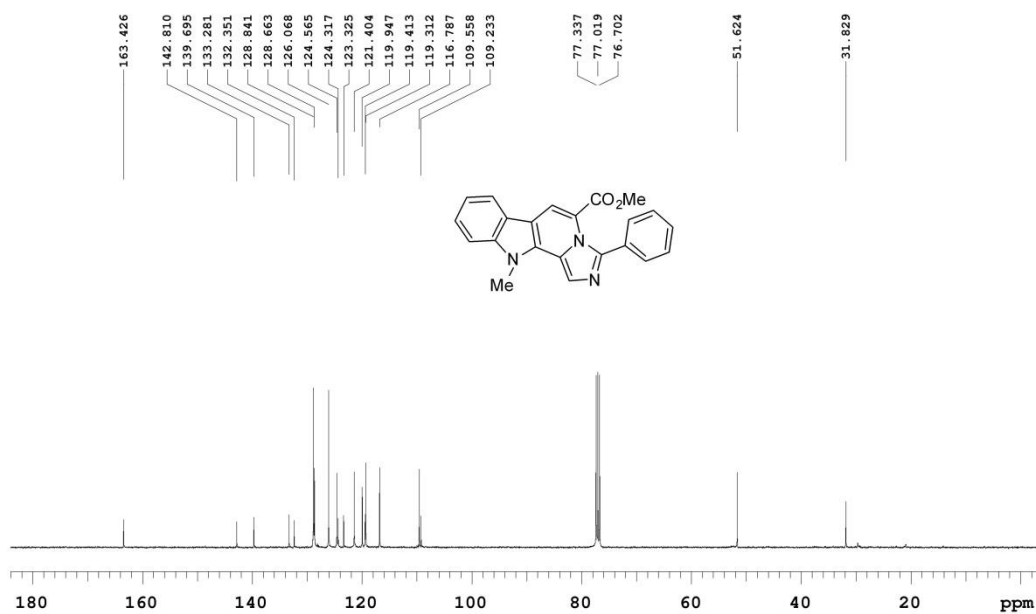

Figure S40.  $^{13}\text{C}$ -NMR spectrum of **1aA**.

Compound Table

| Compound Label       | RT  | Mass     | Formula       | MFG Formula   | MFG Diff (ppm) | DB Formula    |
|----------------------|-----|----------|---------------|---------------|----------------|---------------|
| Cpd 2: C22 H17 N3 O2 | 0.3 | 355.1324 | C22 H17 N3 O2 | C22 H17 N3 O2 | -0.88          | C22 H17 N3 O2 |

| Compound Label       | m/z      | RT  | Algorithm                 | Mass     |
|----------------------|----------|-----|---------------------------|----------|
| Cpd 2: C22 H17 N3 O2 | 356.1393 | 0.3 | Find by Molecular Feature | 355.1324 |

MFE MS Spectrum

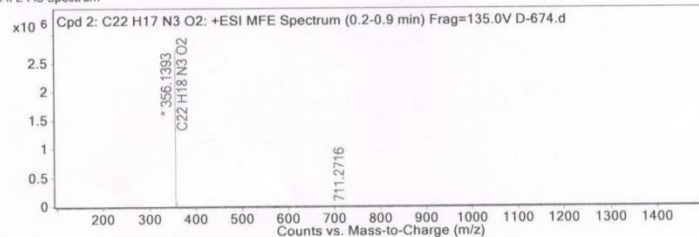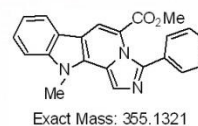

MS Spectrum Peak List

| m/z      | z | Abund     | Formula       | Ion     |
|----------|---|-----------|---------------|---------|
| 356.1393 | 1 | 2741466.5 | C22 H18 N3 O2 | (M+H)+  |
| 357.1441 | 1 | 620138.5  | C22 H18 N3 O2 | (M+H)+  |
| 358.1473 | 1 | 86652.02  | C22 H18 N3 O2 | (M+H)+  |
| 359.1488 | 1 | 7136.87   | C22 H18 N3 O2 | (M+H)+  |
| 711.2716 | 1 | 5790.14   |               | (2M+H)+ |
| 712.276  | 1 | 3602.02   |               | (2M+H)+ |
| 713.2864 | 1 | 4904.48   |               | (2M+H)+ |

Predicted Isotope Match Table

| Isotope | m/z      | Calc m/z | Diff (ppm) | Abund % | Calc Abund % | Abund Sum % | Calc Abund Sum % |
|---------|----------|----------|------------|---------|--------------|-------------|------------------|
| 1       | 356.1393 | 356.1394 | 0.11       | 100     | 100          | 79.34       | 77.54            |
| 2       | 357.1441 | 357.1425 | -4.59      | 22.62   | 25.17        | 17.95       | 19.52            |
| 3       | 358.1473 | 358.1453 | -5.41      | 3.16    | 3.45         | 2.51        | 2.67             |
| 4       | 359.1488 | 359.148  | -1.99      | 0.26    | 0.34         | 0.21        | 0.26             |

--- End Of Report ---

Figure S41. HRMS spectrum of 1aA.

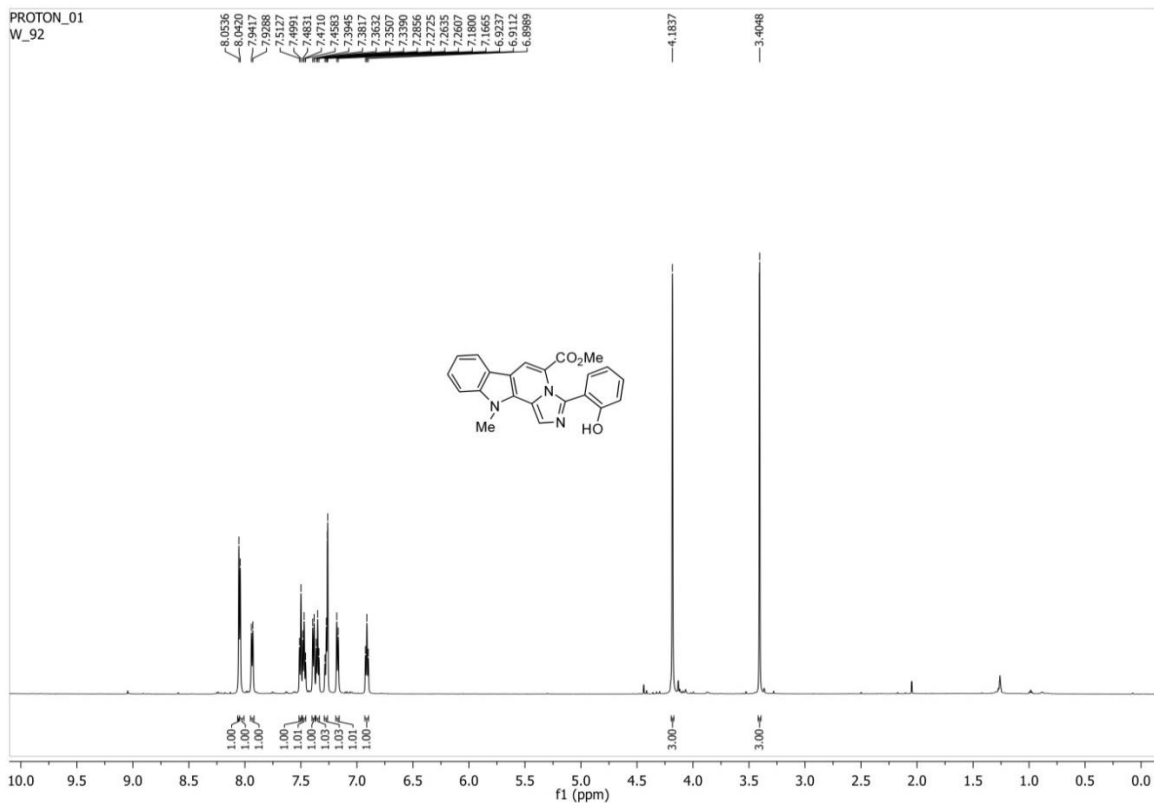Figure S42. <sup>1</sup>H-NMR spectrum of 1aB.

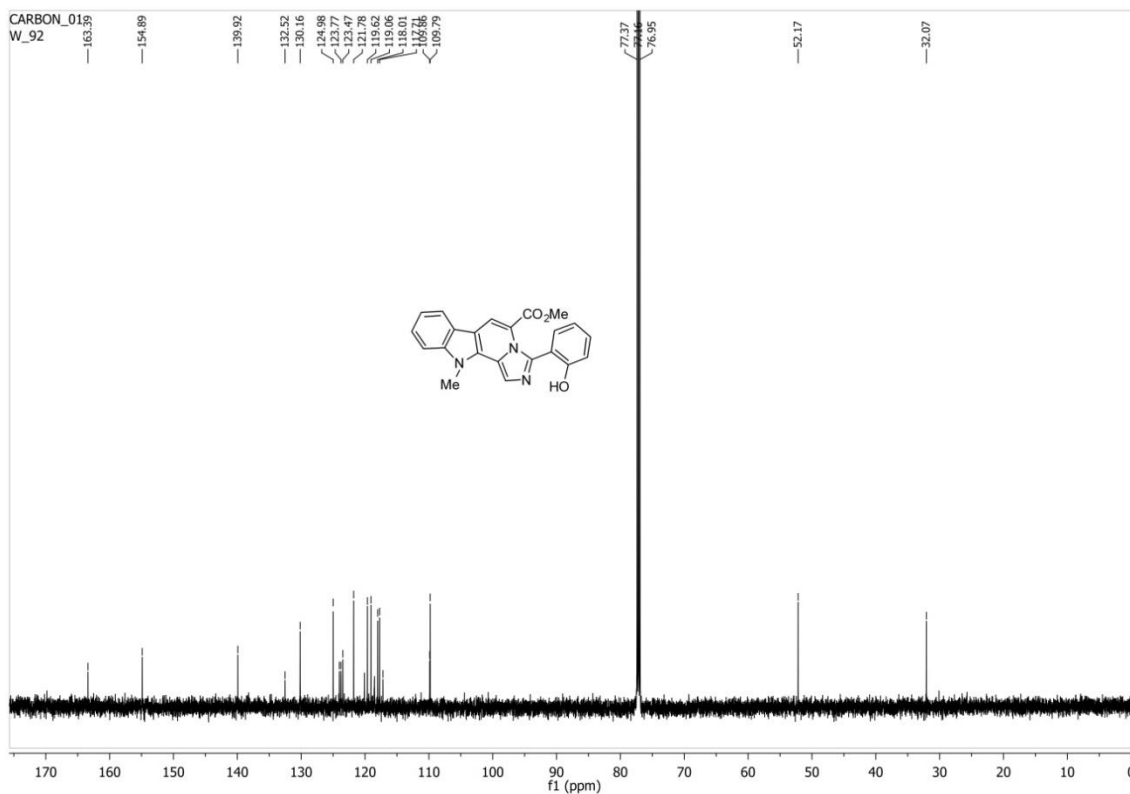

Figure S43.  $^{13}\text{C}$ -NMR spectrum of **1aB**.

Sample Group  
Acquisition SW  
Version

6200 series TOF/6500 series  
Q-TOF B.05.01 (B5125)

Info.

Compound Table

| Compound Label       | RT  | Mass    | Formula       | MFG Formula   | MFG Diff (ppm) | DB Formula    |
|----------------------|-----|---------|---------------|---------------|----------------|---------------|
| Cpd 3: C22 H17 N3 O3 | 0.3 | 371.123 | C22 H17 N3 O3 | C22 H17 N3 O3 | 10.87          | C22 H17 N3 O3 |

| Compound Label       | m/z      | RT  | Algorithm                 | Mass    |
|----------------------|----------|-----|---------------------------|---------|
| Cpd 3: C22 H17 N3 O3 | 372.1308 | 0.3 | Find by Molecular Feature | 371.123 |

MFE MS Spectrum

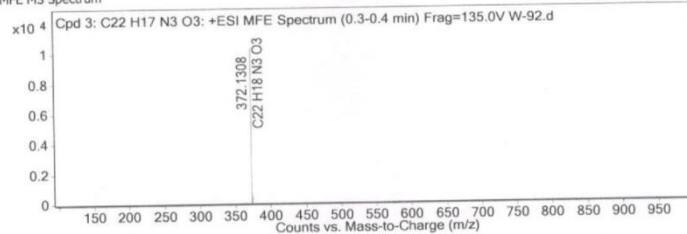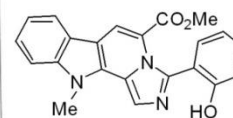

MS Spectrum Peak List

| m/z      | z | Abund    | Formula       | Ion    |
|----------|---|----------|---------------|--------|
| 372.1308 | 1 | 10339.76 | C22 H18 N3 O3 | (M+H)+ |
| 373.1318 | 1 | 3329.37  | C22 H18 N3 O3 | (M+H)+ |
| 374.1342 | 1 | 550.39   | C22 H18 N3 O3 | (M+H)+ |

Predicted Isotope Match Table

| Isotope | m/z      | Calc m/z | Diff (ppm) | Abund % | Calc Abund % | Abund Sum % | Calc Abund Sum % |
|---------|----------|----------|------------|---------|--------------|-------------|------------------|
| 1       | 372.1308 | 372.1343 | 9.21       | 100     | 100          | 72.72       | 77.59            |
| 2       | 373.1318 | 373.1374 | 15.01      | 32.2    | 25.21        | 23.41       | 19.56            |
| 3       | 374.1342 | 374.1401 | 15.86      | 5.32    | 3.66         | 3.87        | 2.84             |

--- End Of Report ---

Figure S44. HRMS spectrum of **1aB**.

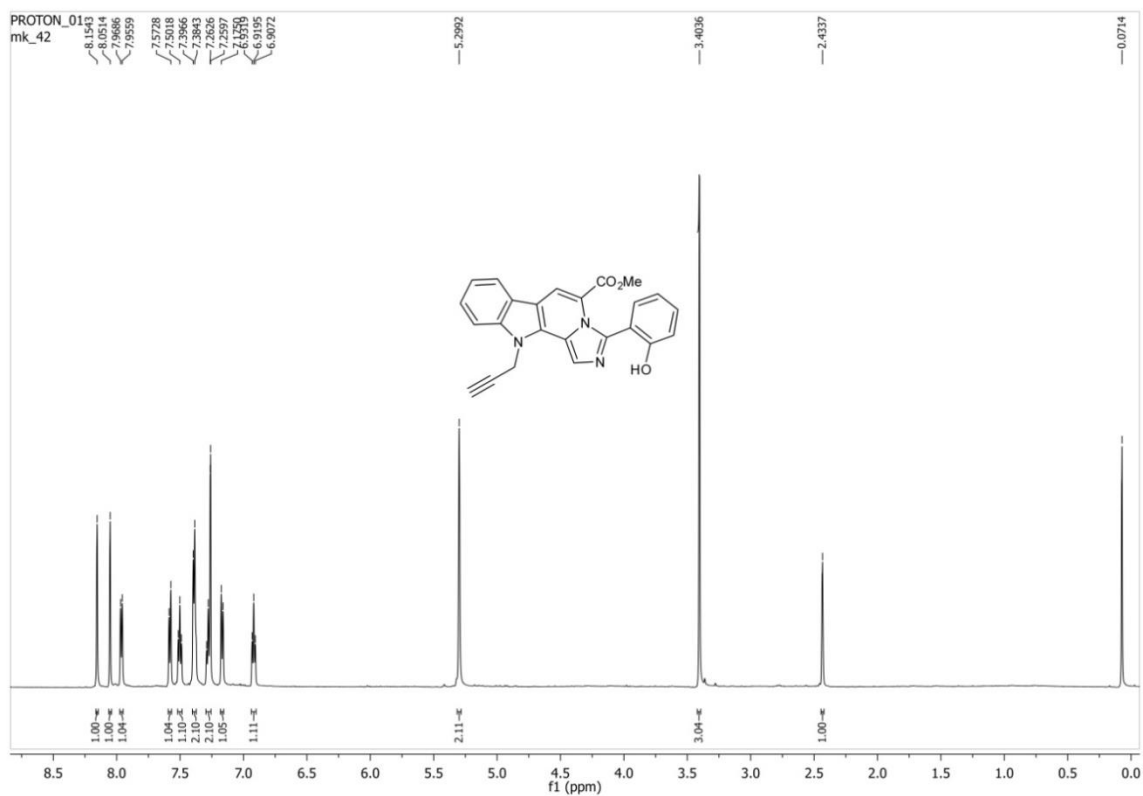

Figure S45.  $^1\text{H}$ -NMR spectrum of **1fB**.

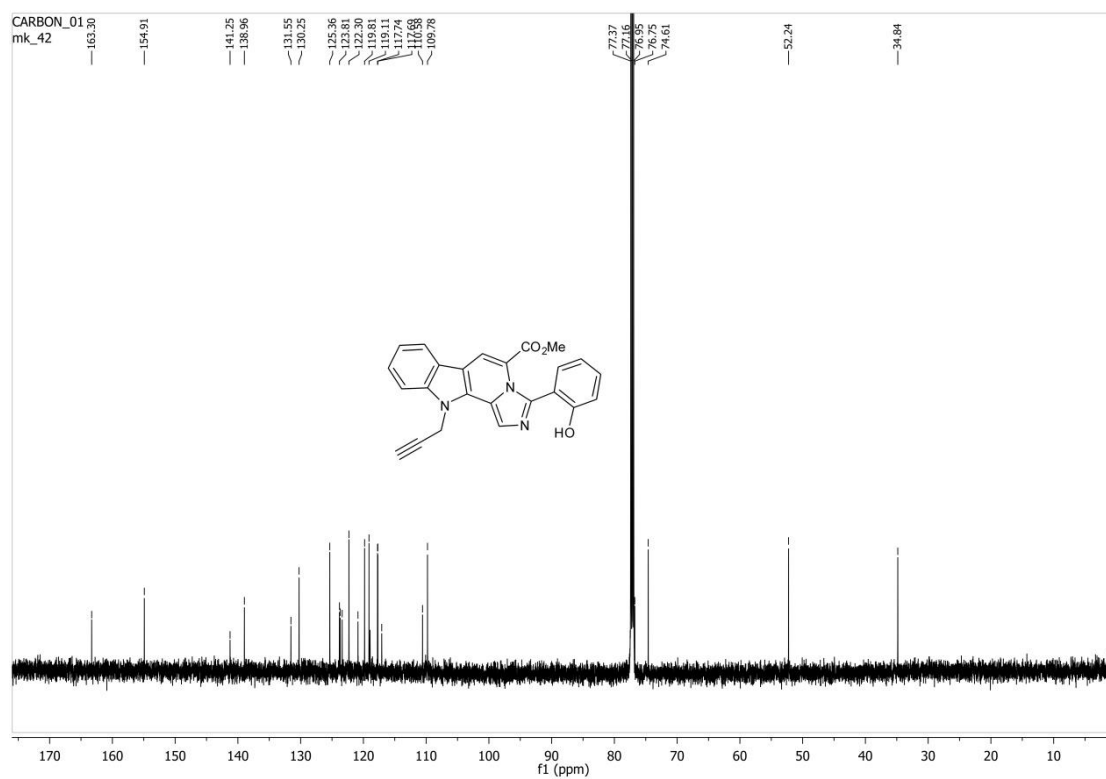

Figure S46.  $^{13}\text{C}$ -NMR spectrum of **1fB**.

Sample Group  
Acquisition SW  
Version

6200 series TOF/6500 series  
Q-TOF B.05.01 (B5125)

Info.

#### Compound Table

| Compound Label       | RT  | Mass     | Formula       | MFG Formula   | MFG Diff (ppm) | DB Formula    |
|----------------------|-----|----------|---------------|---------------|----------------|---------------|
| Cpd 3: C24 H17 N3 O3 | 0.3 | 395.1272 | C24 H17 N3 O3 | C24 H17 N3 O3 | -0.44          | C24 H17 N3 O3 |

| Compound Label       | m/z      | RT  | Algorithm                 | Mass     |
|----------------------|----------|-----|---------------------------|----------|
| Cpd 3: C24 H17 N3 O3 | 396.1344 | 0.3 | Find by Molecular Feature | 395.1272 |

#### MFE MS Spectrum

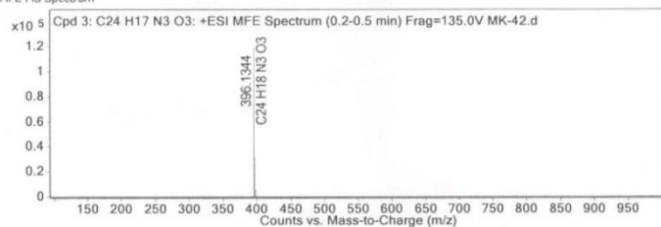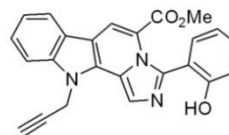

#### MS Spectrum Peak List

| m/z      | z | Abund     | Formula       | Ion    |
|----------|---|-----------|---------------|--------|
| 396.1344 | 1 | 118794.03 | C24 H18 N3 O3 | (M+H)+ |
| 397.1375 | 1 | 31650.04  | C24 H18 N3 O3 | (M+H)+ |
| 398.1408 | 1 | 5216.89   | C24 H18 N3 O3 | (M+H)+ |
| 399.1426 | 1 | 782.46    | C24 H18 N3 O3 | (M+H)+ |

#### Predicted Isotope Match Table

| Isotope | m/z      | Calc m/z | Diff (ppm) | Abund % | Calc Abund % | Abund Sum % | Calc Abund Sum % |
|---------|----------|----------|------------|---------|--------------|-------------|------------------|
| 1       | 396.1344 | 396.1343 | -0.46      | 100     | 100          | 75.93       | 75.72            |
| 2       | 397.1375 | 397.1374 | -0.22      | 26.64   | 27.38        | 20.23       | 20.73            |
| 3       | 398.1408 | 398.1402 | -1.54      | 4.39    | 4.22         | 3.33        | 3.2              |
| 4       | 399.1426 | 399.1429 | 0.71       | 0.66    | 0.47         | 0.5         | 0.36             |

--- End Of Report ---

Figure S47. HRMS spectrum of **1fB**.

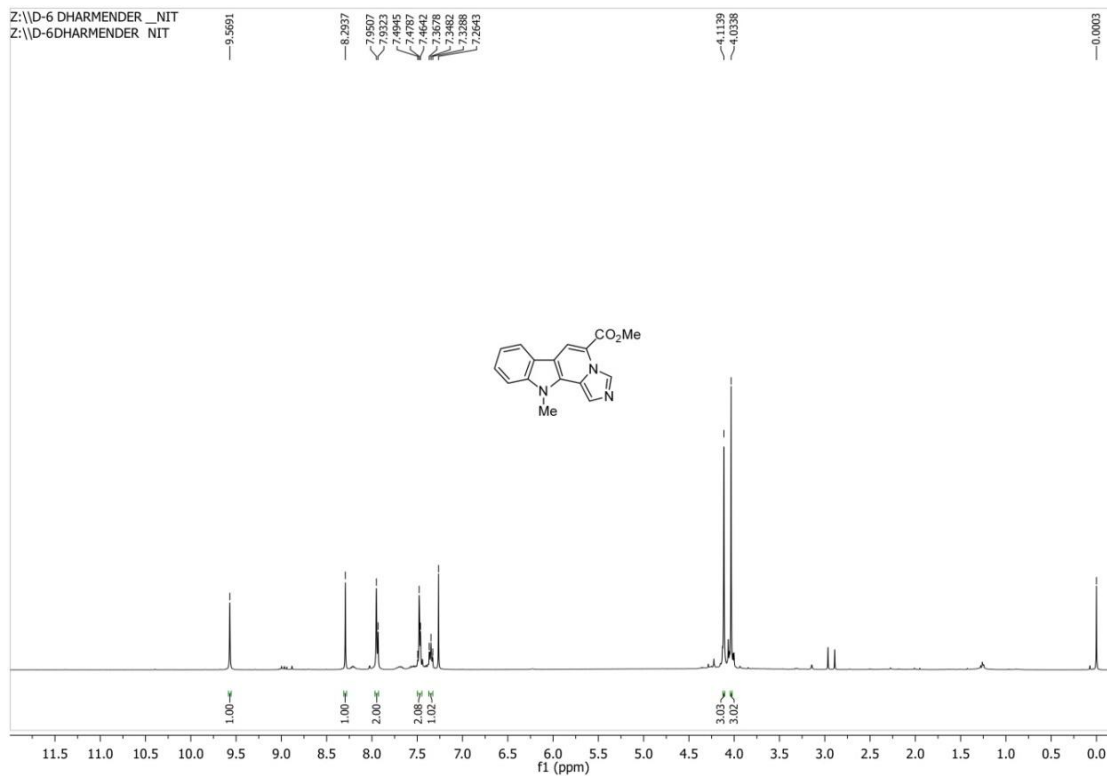

Figure S48. <sup>1</sup>H-NMR spectrum of **1aE**.

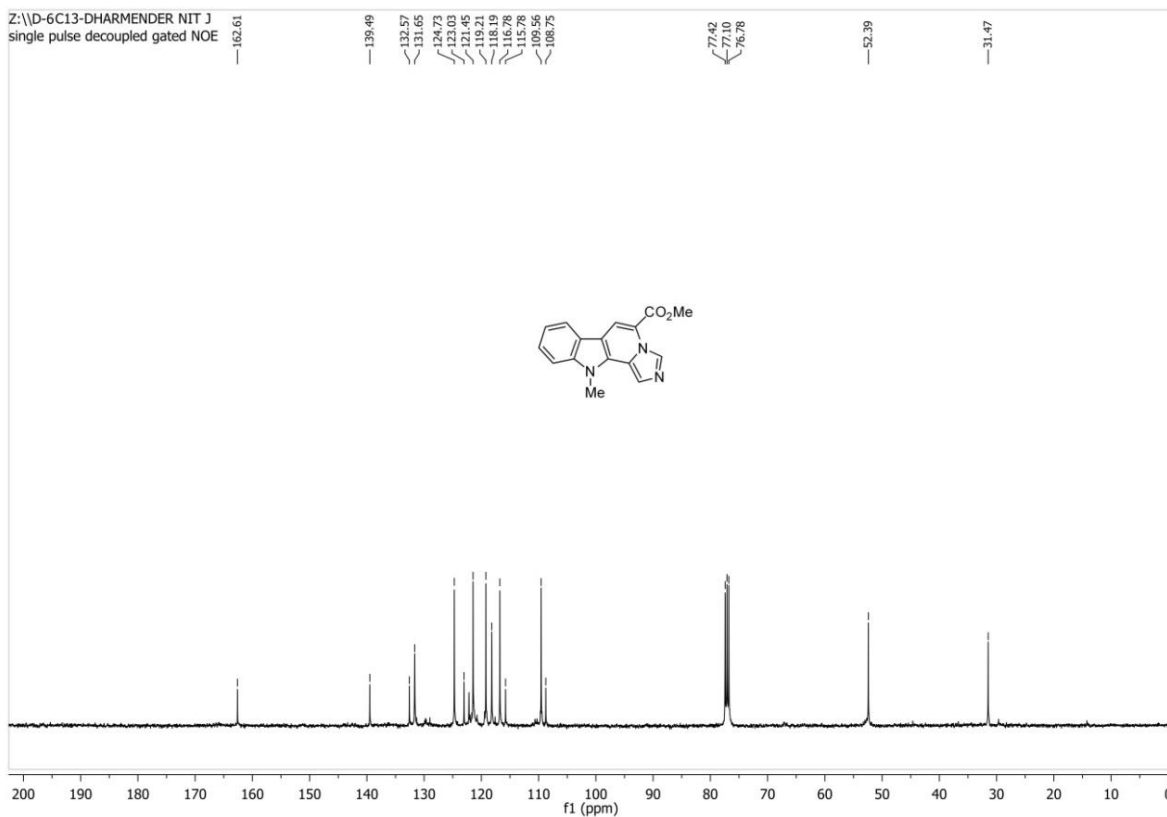

Figure S49.  $^{13}\text{C}$ -NMR spectrum of **1aE**.

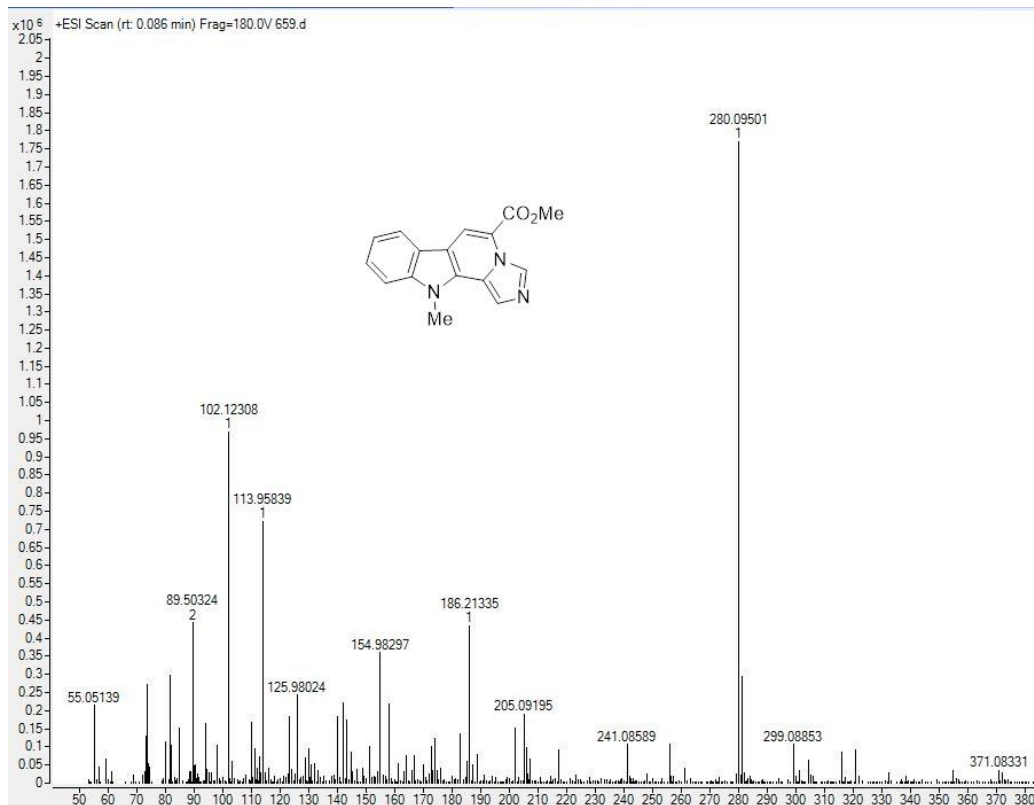

Figure S50. HRMS spectrum of **1aE**.

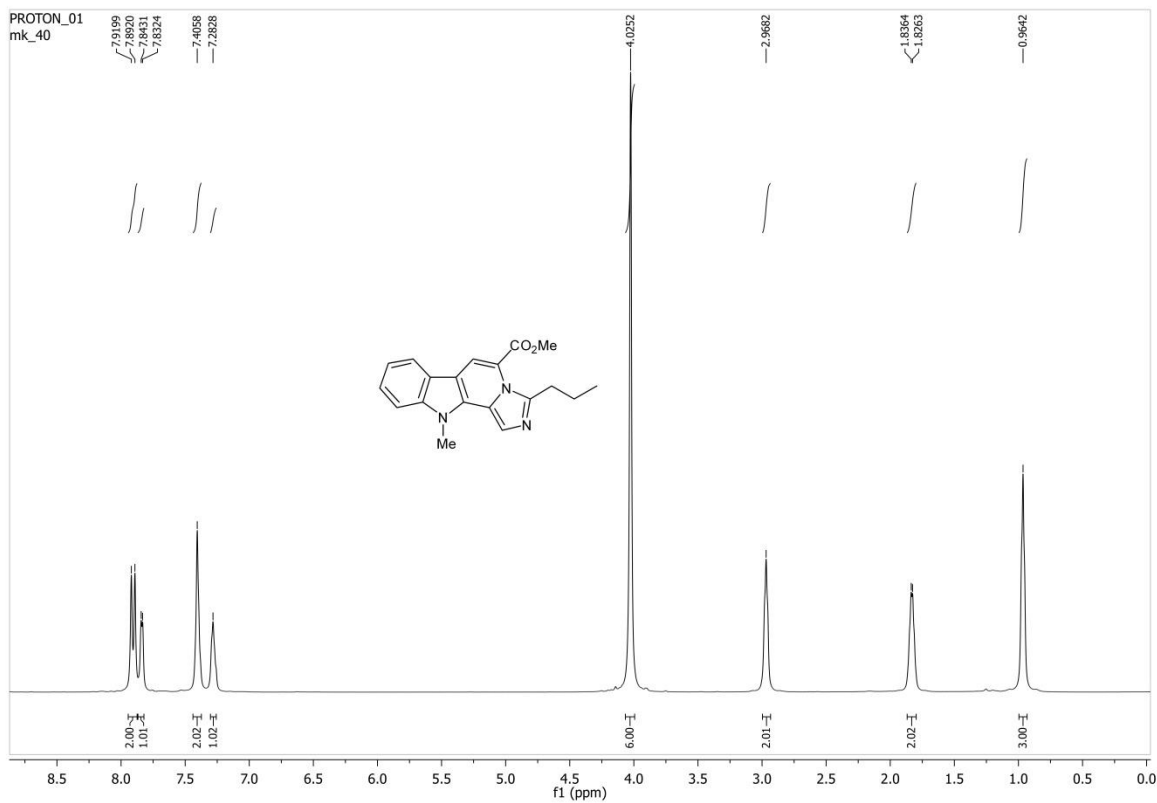

Figure S51.  $^1\text{H}$ -NMR spectrum of **1aG**.

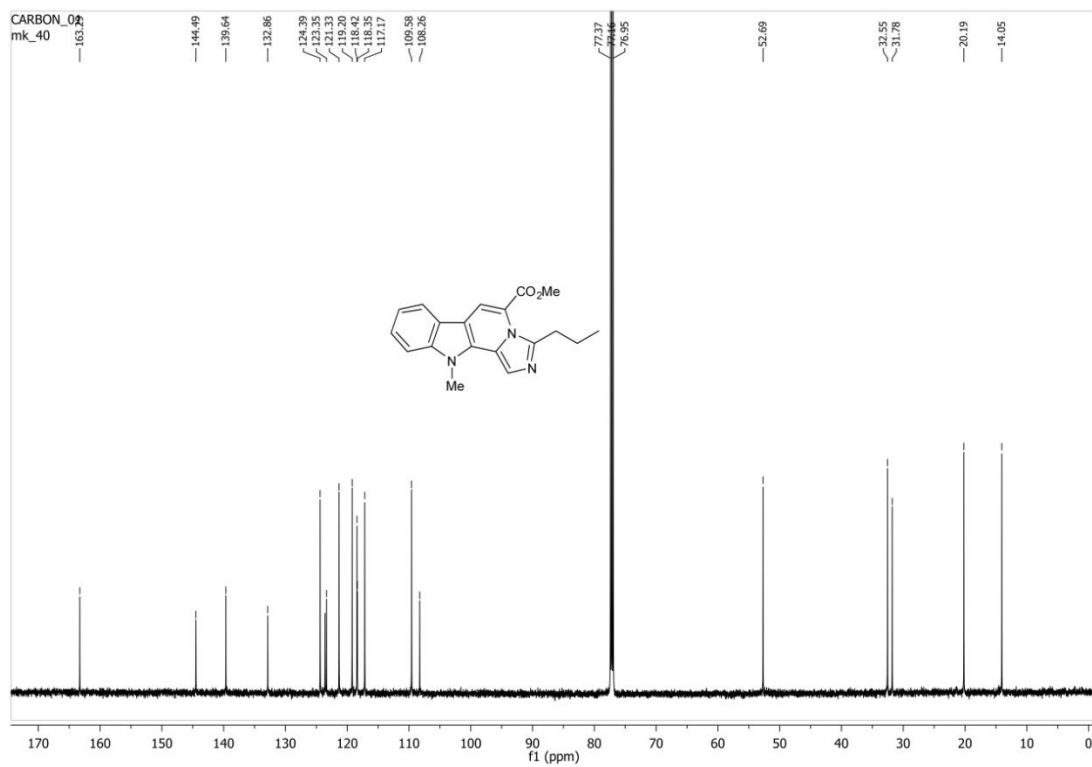

Figure S52.  $^{13}\text{C}$ -NMR spectrum of **1aG**.



Sample Group  
Acquisition SW  
Version

6200 series TOF/6500 series  
Q-TOF B.05.01 (B5125)

Info.

Compound Table

| Compound Label       | RT  | Mass     | Formula       | MFG Formula   | MFG Diff (ppm) | DB Formula    |
|----------------------|-----|----------|---------------|---------------|----------------|---------------|
| Cpd 1: C19 H19 N3 O2 | 0.3 | 321.1484 | C19 H19 N3 O2 | C19 H19 N3 O2 | -2.12          | C19 H19 N3 O2 |

| Compound Label       | m/z      | RT  | Algorithm                 | Mass     |
|----------------------|----------|-----|---------------------------|----------|
| Cpd 1: C19 H19 N3 O2 | 322.1557 | 0.3 | Find by Molecular Feature | 321.1484 |

MFE MS Spectrum

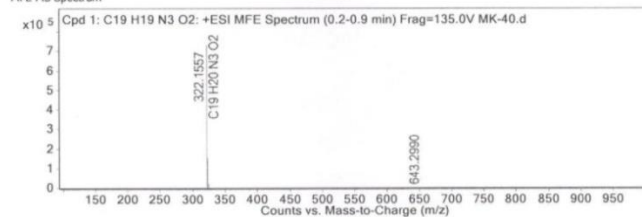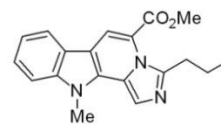

MS Spectrum Peak List

| m/z      | z | Abund     | Formula       | Ion     |
|----------|---|-----------|---------------|---------|
| 322.1557 | 1 | 729553.94 | C19 H20 N3 O2 | (M+H)+  |
| 323.1588 | 1 | 152525.94 | C19 H20 N3 O2 | (M+H)+  |
| 324.1616 | 1 | 19209.52  | C19 H20 N3 O2 | (M+H)+  |
| 325.1639 | 1 | 1956.26   | C19 H20 N3 O2 | (M+H)+  |
| 326.1603 | 1 | 352.25    | C19 H20 N3 O2 | (M+H)+  |
| 643.299  | 1 | 209.45    |               | (2M+H)+ |

Predicted Isotope Match Table

| Isotope | m/z      | Calc m/z | Diff (ppm) | Abund % | Calc Abund % | Abund Sum % | Calc Abund Sum % |
|---------|----------|----------|------------|---------|--------------|-------------|------------------|
| 1       | 322.1557 | 322.155  | -2.12      | 100     | 100          | 80.74       | 80.05            |
| 2       | 323.1588 | 323.1581 | -2.1       | 20.91   | 21.95        | 16.88       | 17.57            |
| 3       | 324.1616 | 324.1608 | -2.19      | 2.63    | 2.71         | 2.13        | 2.17             |
| 4       | 325.1639 | 325.1635 | -1.26      | 0.27    | 0.24         | 0.22        | 0.19             |
| 5       | 326.1603 | 326.1661 | 17.7       | 0.05    | 0.02         | 0.04        | 0.01             |

--- End Of Report ---

Figure S53. HRMS spectrum of 1aG.

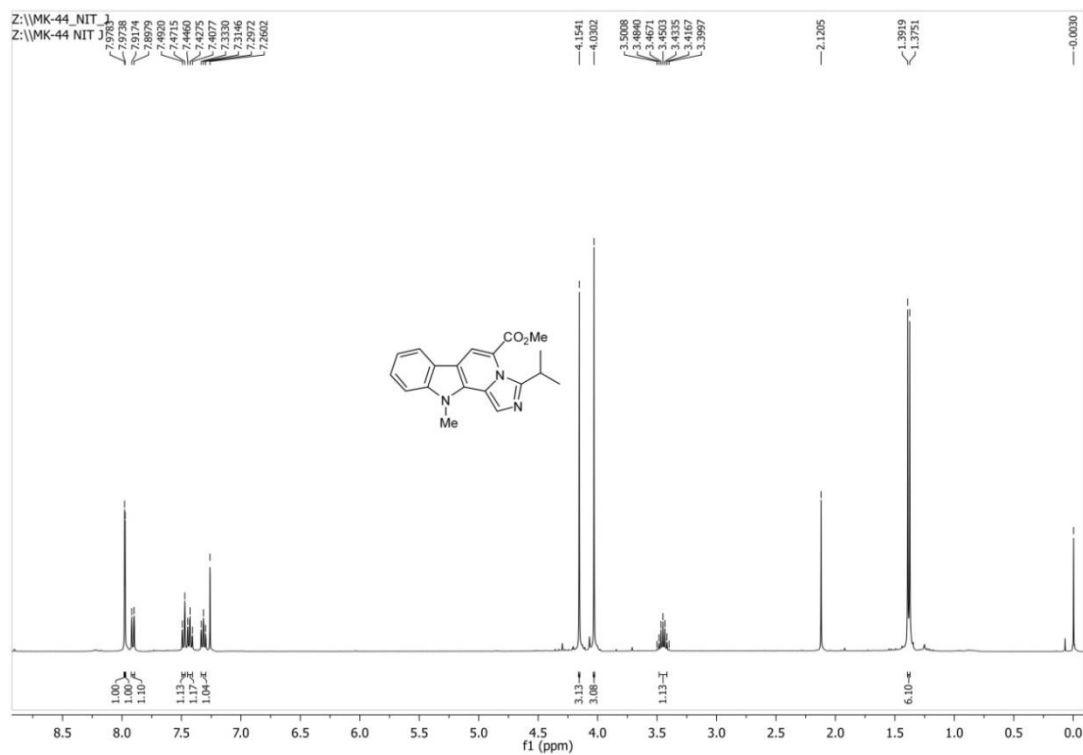

Figure S54. <sup>1</sup>H-NMR spectrum of 1aH.

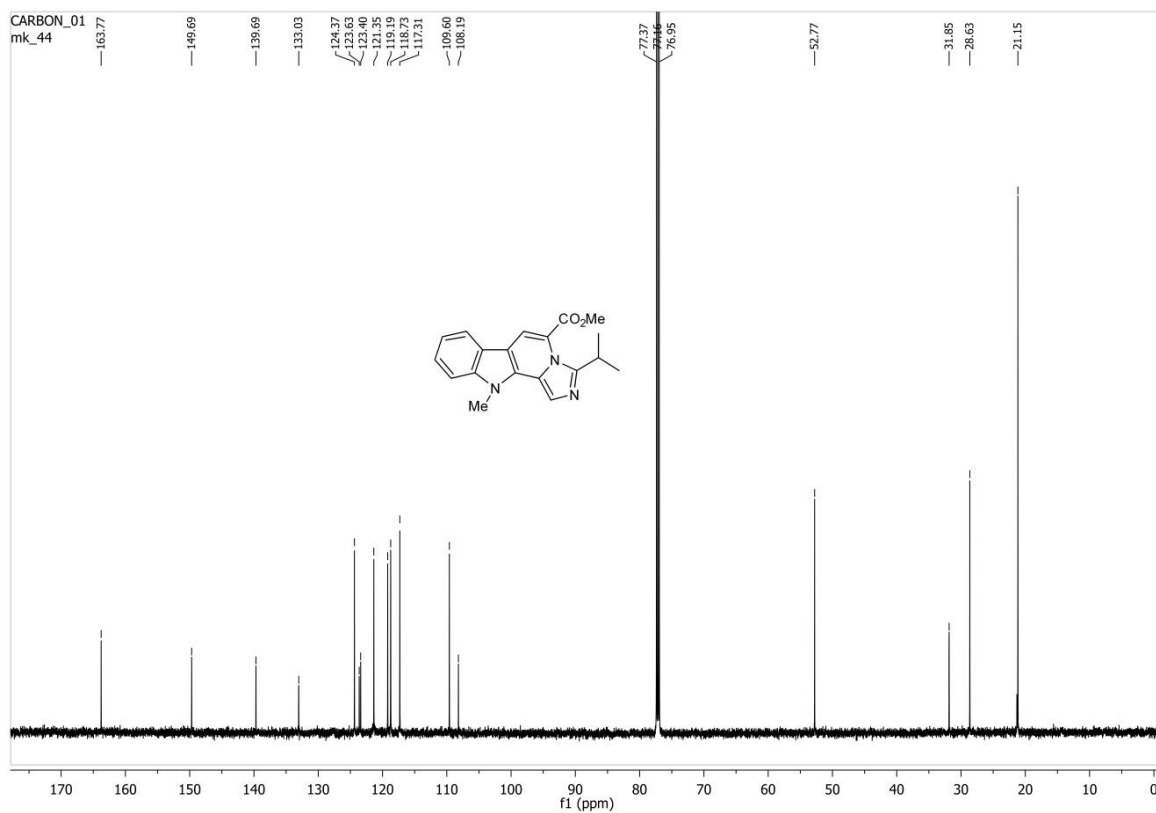

Figure S55.  $^{13}\text{C}$ -NMR spectrum of **1aH**.

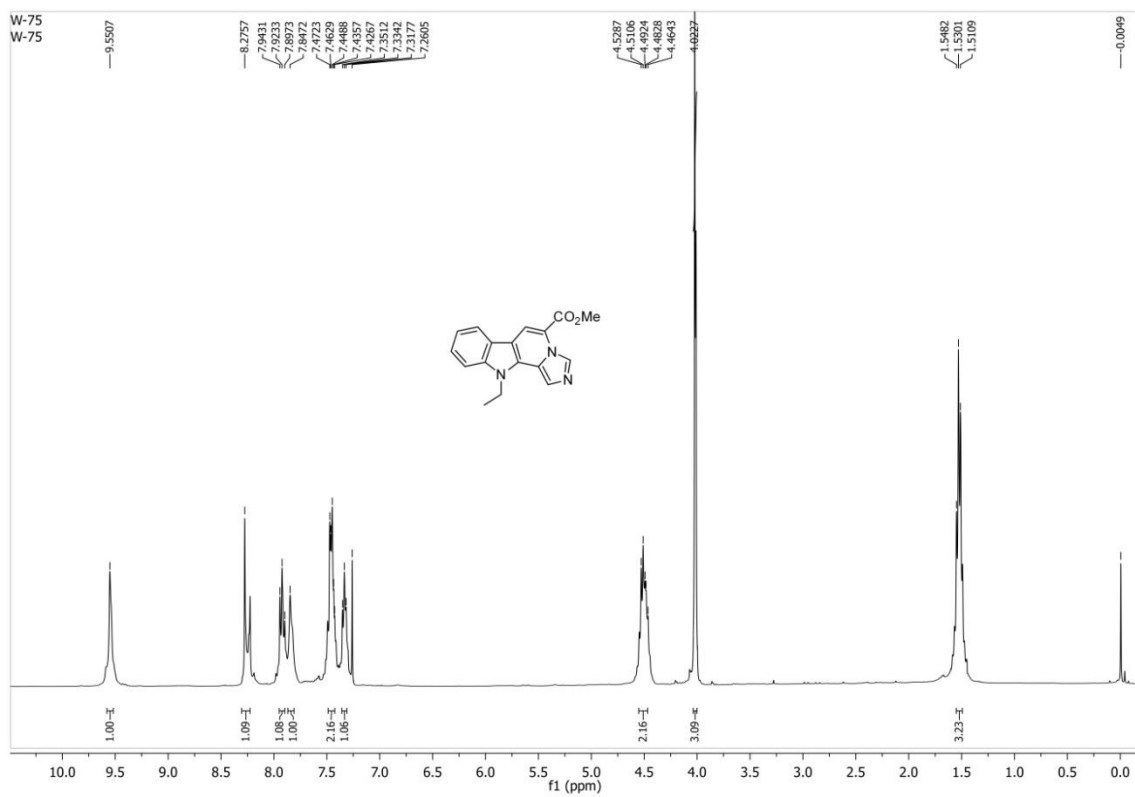

Figure S56.  $^1\text{H}$ -NMR spectrum of **1bE**.

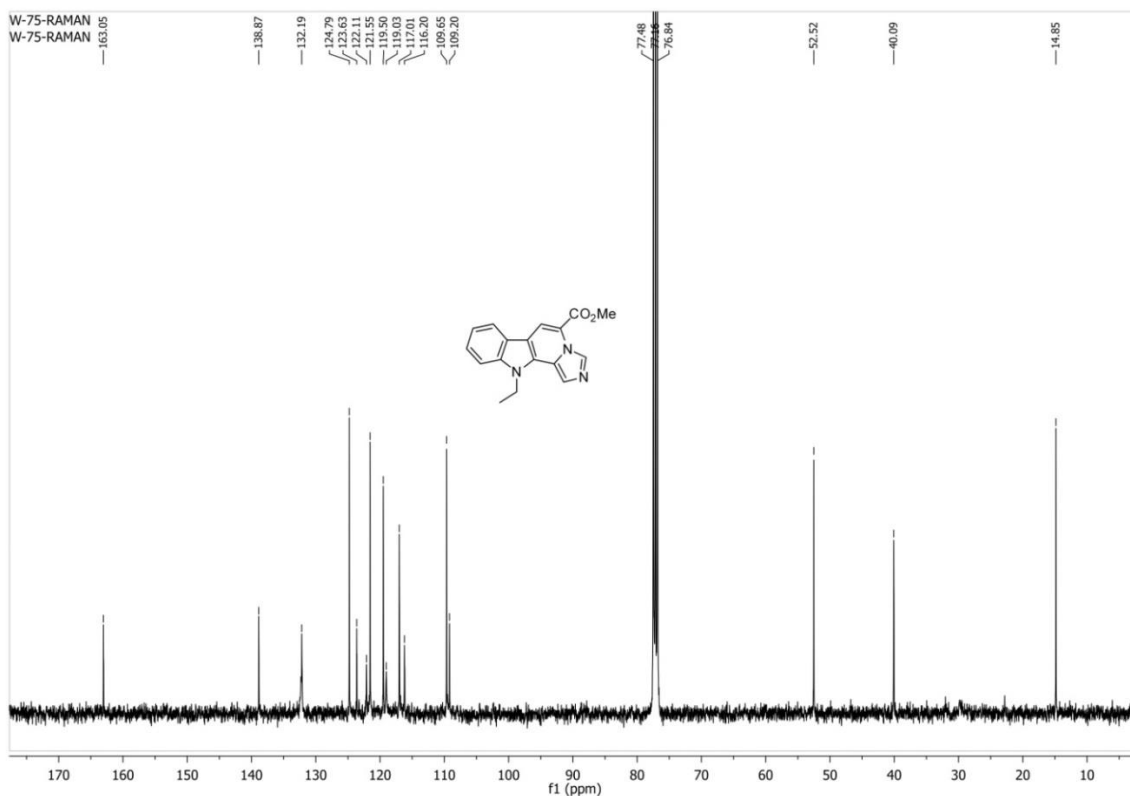

Figure S57.  $^{13}\text{C}$ -NMR spectrum of **1bE**.

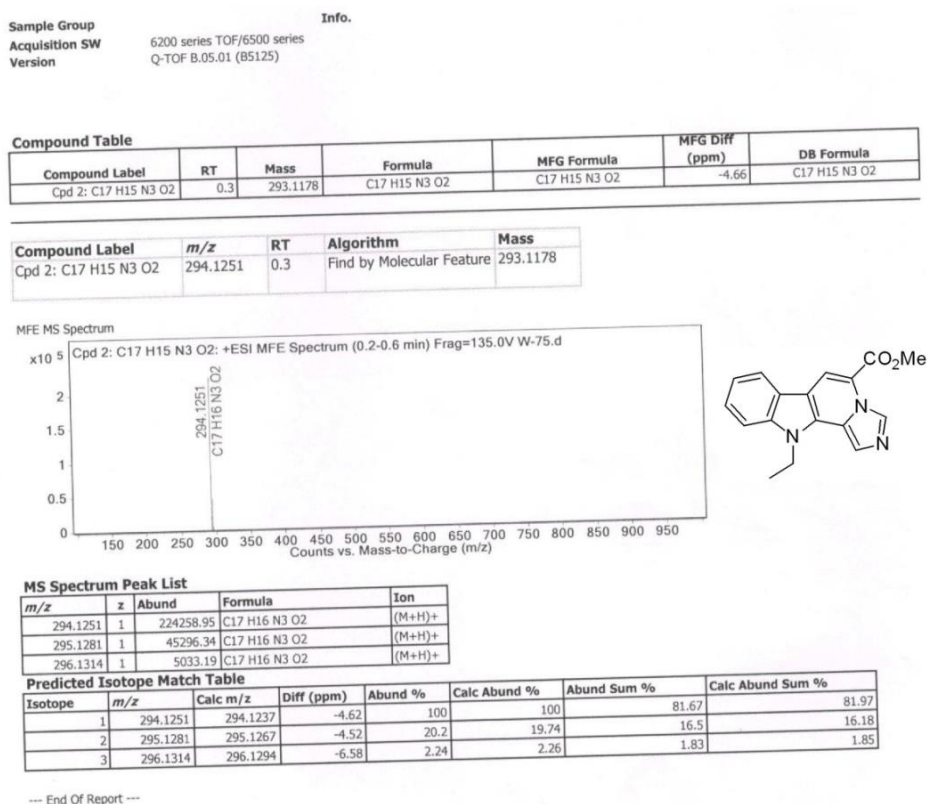

Figure S58. HRMS spectrum of **1bE**.

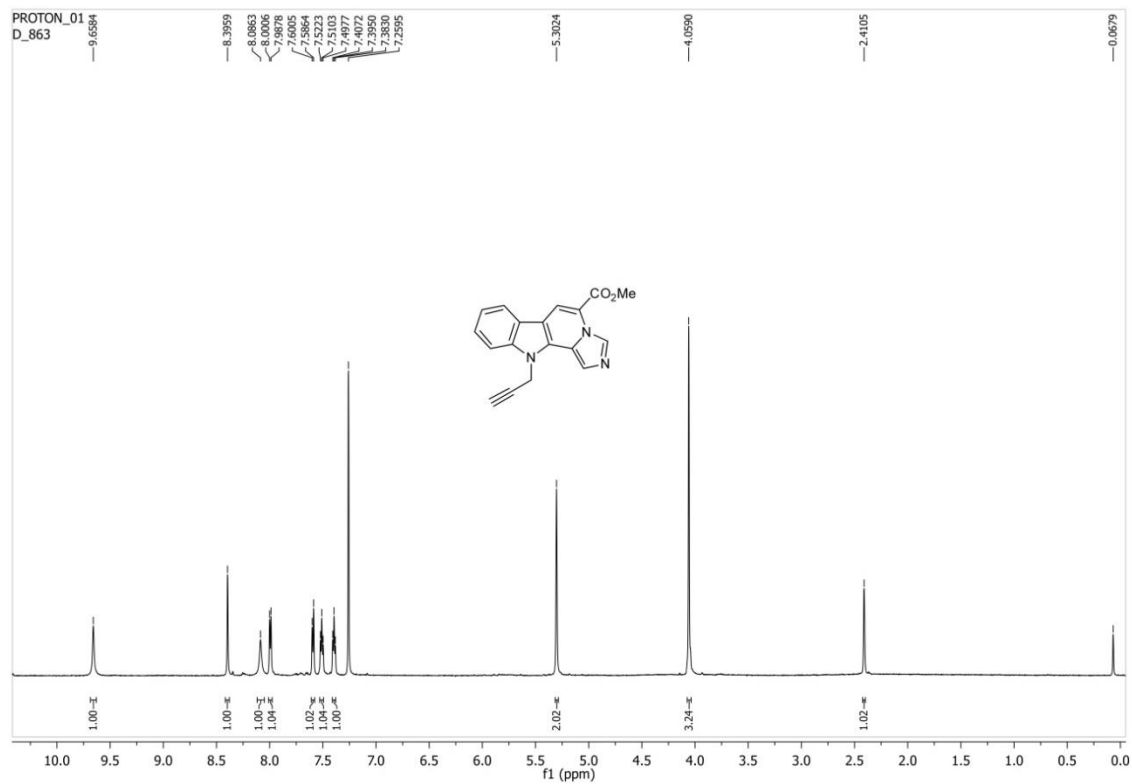

Figure S59.  $^1\text{H}$ -NMR spectrum of **1fE**.

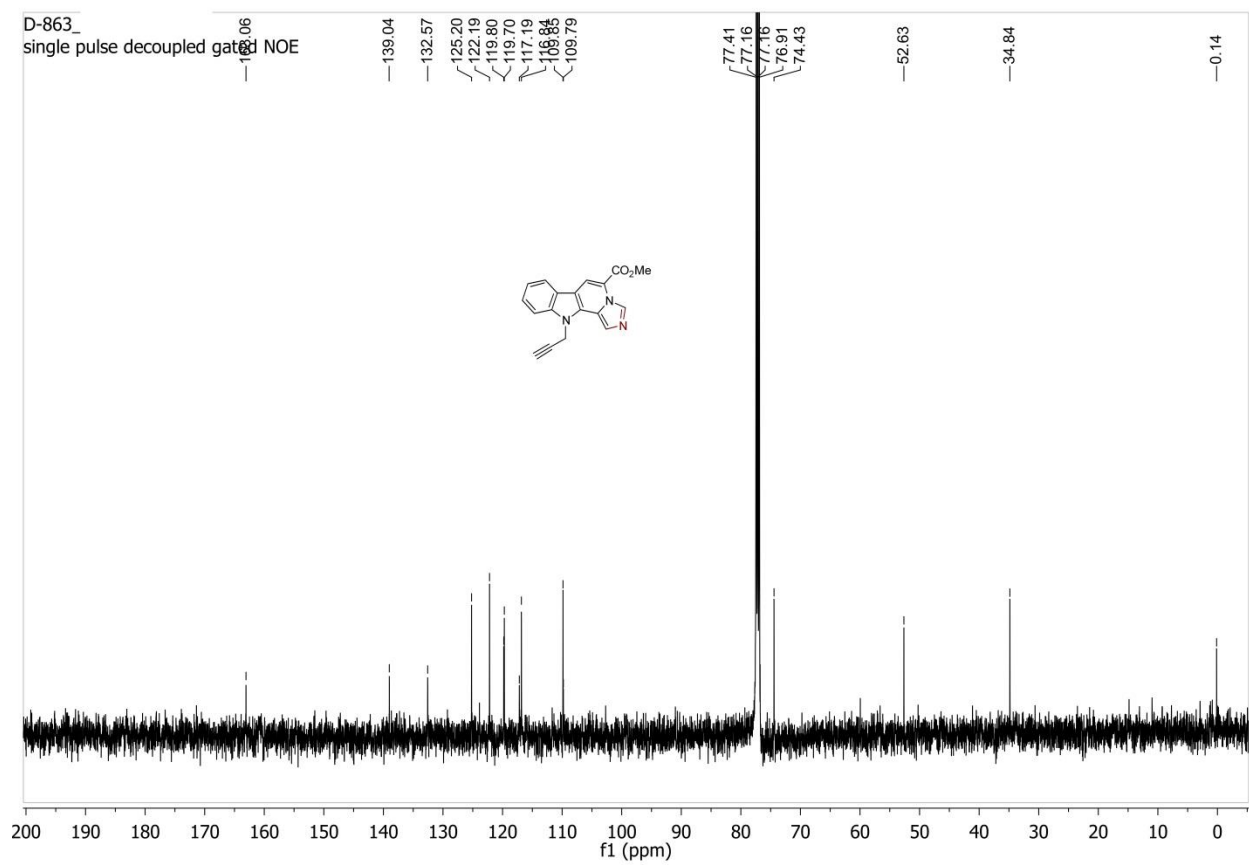

**Figure S60.**  $^{13}\text{C}$ -NMR spectrum of **1fE**.

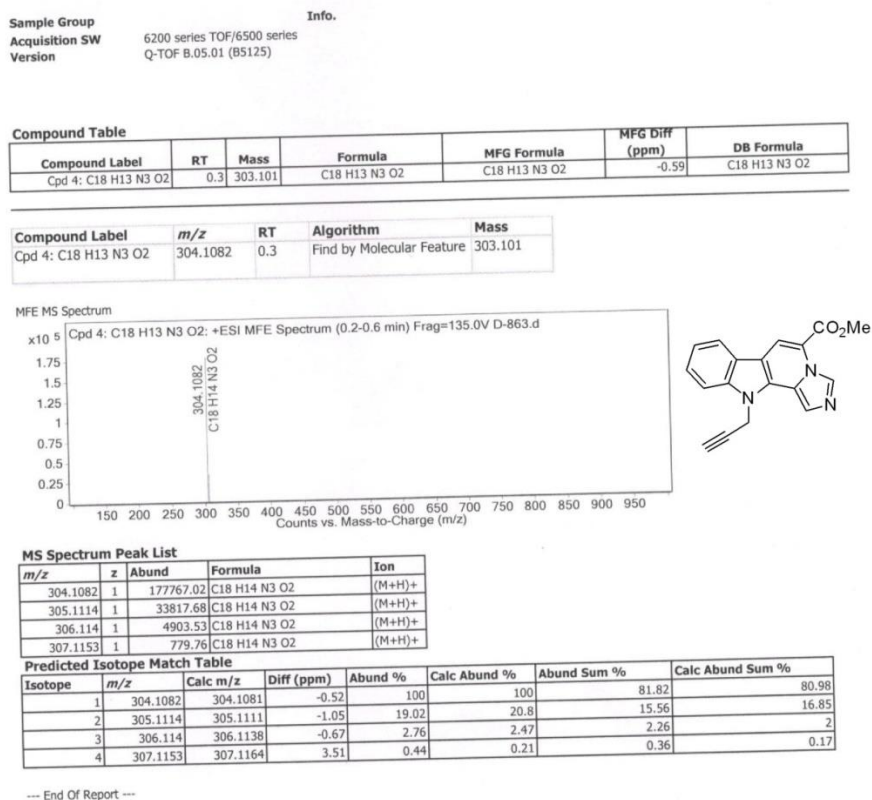

**Figure S61.** HRMS spectrum of **1fE**.

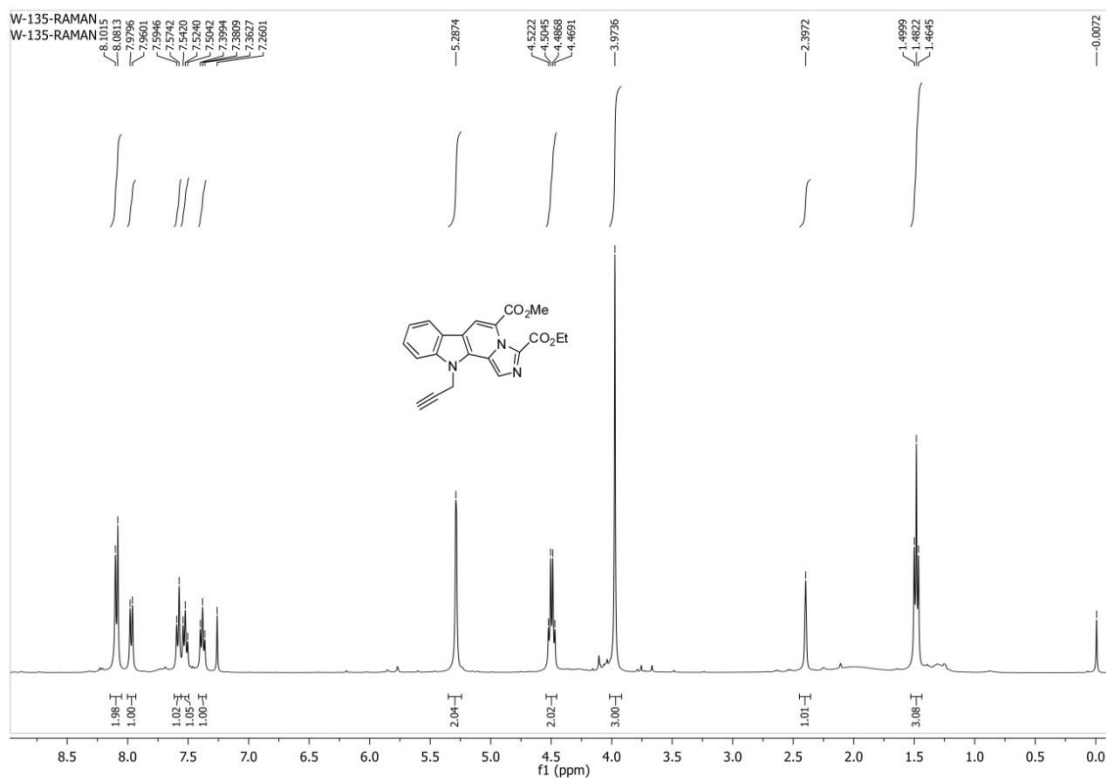

**Figure S62.**  $^1\text{H}$ -NMR spectrum of **1fI**.

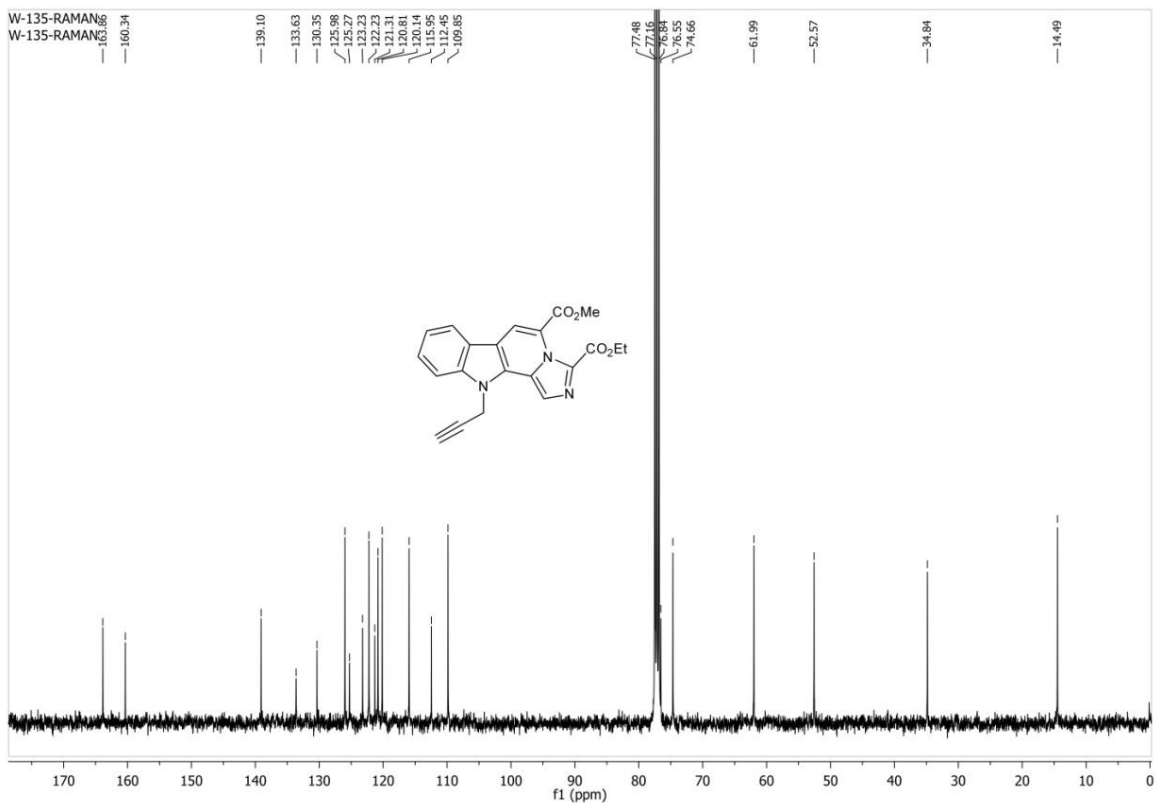

Figure S63.  $^{13}\text{C}$ -NMR spectrum of **1fl**.

Compound Table

| Compound Label       | RT  | Mass     | Formula       | MFG Formula   | MFG Diff (ppm) | DB Formula    |
|----------------------|-----|----------|---------------|---------------|----------------|---------------|
| Cpd 5: C21 H17 N3 O4 | 0.4 | 375.1193 | C21 H17 N3 O4 | C21 H17 N3 O4 | 7.03           | C21 H17 N3 O4 |

| Compound Label       | m/z      | RT  | Algorithm                 | Mass     |
|----------------------|----------|-----|---------------------------|----------|
| Cpd 5: C21 H17 N3 O4 | 376.1265 | 0.4 | Find by Molecular Feature | 375.1193 |

MFE MS Spectrum

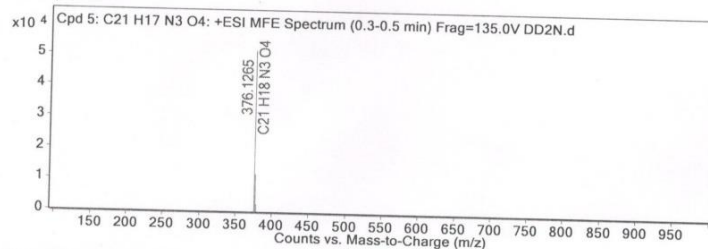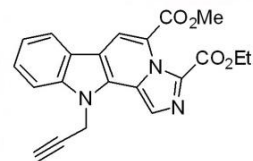

MS Spectrum Peak List

| m/z      | z | Abund    | Formula       | Ion    |
|----------|---|----------|---------------|--------|
| 376.1265 | 1 | 51256.22 | C21 H18 N3 O4 | (M+H)+ |
| 377.1298 | 1 | 11891.12 | C21 H18 N3 O4 | (M+H)+ |
| 378.1323 | 1 | 2320.01  | C21 H18 N3 O4 | (M+H)+ |

Predicted Isotope Match Table

| Isotope | m/z      | Calc m/z | Diff (ppm) | Abund % | Calc Abund % | Abund Sum % | Calc Abund Sum % |
|---------|----------|----------|------------|---------|--------------|-------------|------------------|
| 1       | 376.1265 | 376.1292 | 7.11       | 100     | 100          | 78.29       | 78.26            |
| 2       | 377.1298 | 377.1323 | 6.54       | 23.2    | 24.17        | 18.16       | 18.91            |
| 3       | 378.1323 | 378.1349 | 7.05       | 4.53    | 3.62         | 3.54        | 2.83             |

--- End Of Report ---

Figure S64. HRMS spectrum of **1fl**.

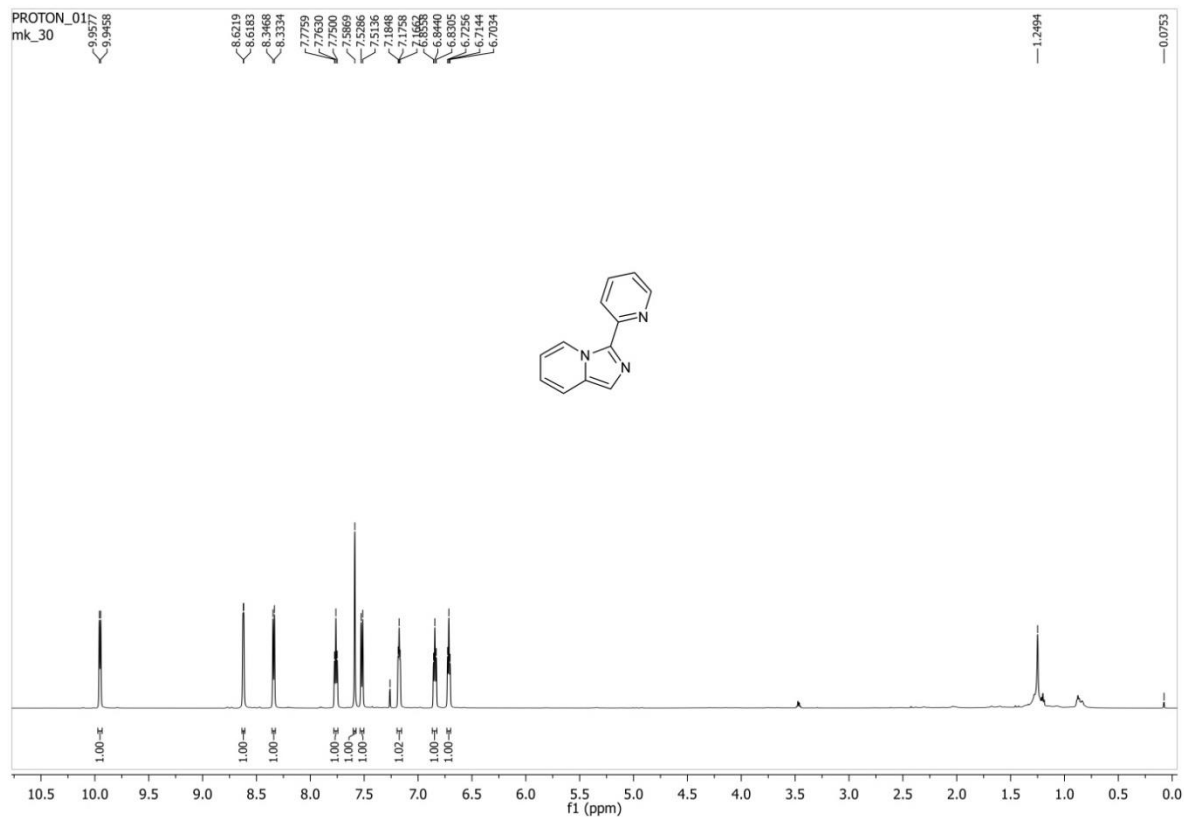

Figure S65.  $^1\text{H}$ -NMR spectrum of DD.

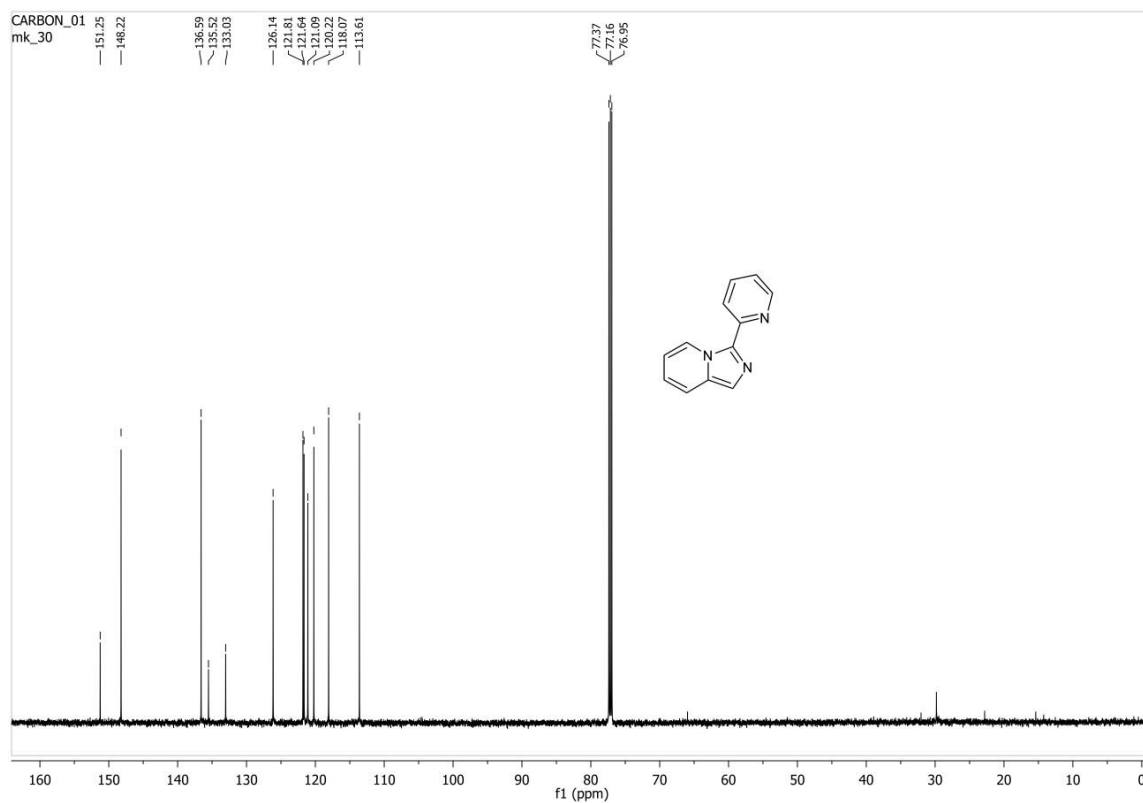

Figure S66.  $^{13}\text{C}$ -NMR spectrum of DD.

Sample Group  
Acquisition SW  
Version

6200 series TOF/6500 series  
Q-TOF 8.05.01 (85125)

Info.

#### Compound Table

| Compound Label   | RT  | Mass     | Formula   | MFG Formula | MFG Diff (ppm) | DB Formula |
|------------------|-----|----------|-----------|-------------|----------------|------------|
| Cpd 1: C12 H9 N3 | 0.3 | 195.0805 | C12 H9 N3 | C12 H9 N3   | -4.42          | C12 H9 N3  |

| Compound Label   | m/z      | RT  | Algorithm                 | Mass     |
|------------------|----------|-----|---------------------------|----------|
| Cpd 1: C12 H9 N3 | 196.0877 | 0.3 | Find by Molecular Feature | 195.0805 |

#### MFE MS Spectrum

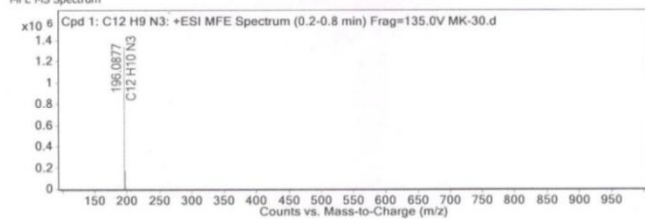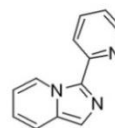

#### MS Spectrum Peak List

| m/z      | z | Abund      | Formula    | Ion    |
|----------|---|------------|------------|--------|
| 196.0877 | 1 | 1335569.38 | C12 H10 N3 | (M+H)+ |
| 197.0912 | 1 | 176377.19  | C12 H10 N3 | (M+H)+ |
| 198.0943 | 1 | 11943.33   | C12 H10 N3 | (M+H)+ |
| 199.096  | 1 | 858.95     | C12 H10 N3 | (M+H)+ |

#### Predicted Isotope Match Table

| Isotope | m/z      | Calc m/z | Diff (ppm) | Abund % | Calc Abund % | Abund Sum % | Calc Abund Sum % |
|---------|----------|----------|------------|---------|--------------|-------------|------------------|
| 1       | 196.0877 | 196.0869 | -4         | 100     | 100          | 87.59       | 86.83            |
| 2       | 197.0912 | 197.0898 | -7.1       | 13.21   | 14.19        | 11.57       | 12.32            |
| 3       | 198.0943 | 198.0927 | -8.17      | 0.89    | 0.93         | 0.78        | 0.81             |
| 4       | 199.096  | 199.0955 | -2.84      | 0.06    | 0.04         | 0.06        | 0.03             |

--- End Of Report ---

Figure S67. HRMS spectrum of DD.

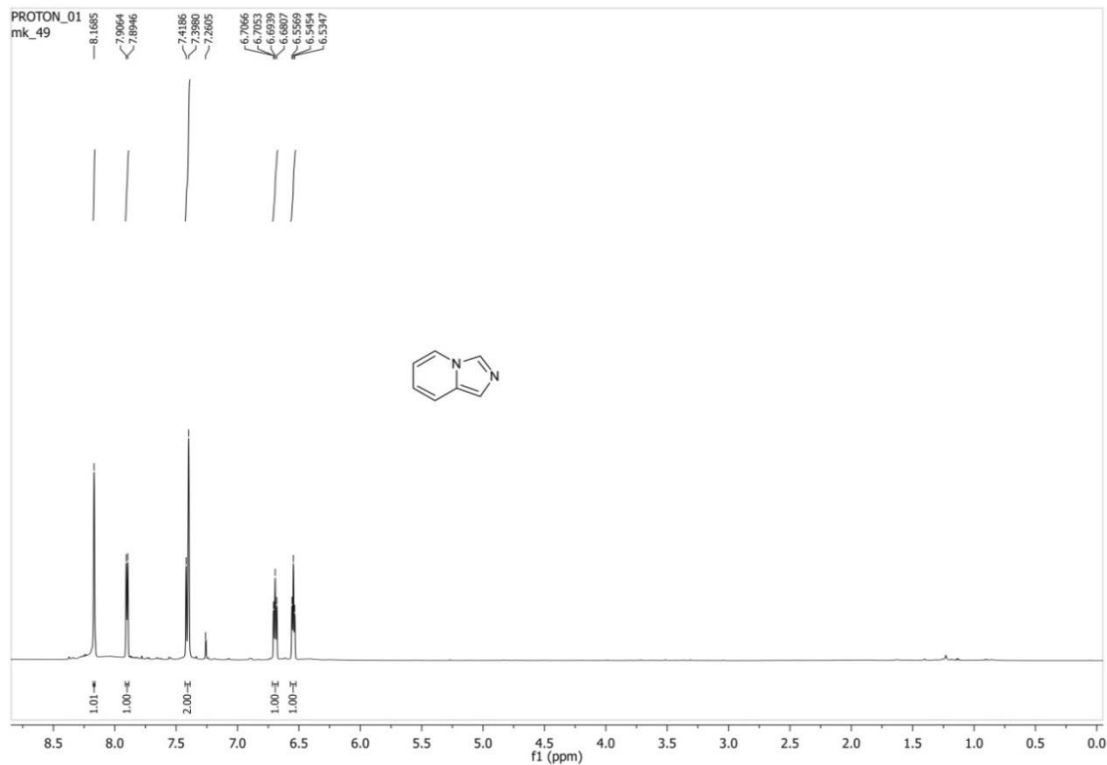

Figure S68. <sup>1</sup>H-NMR spectrum of DE.



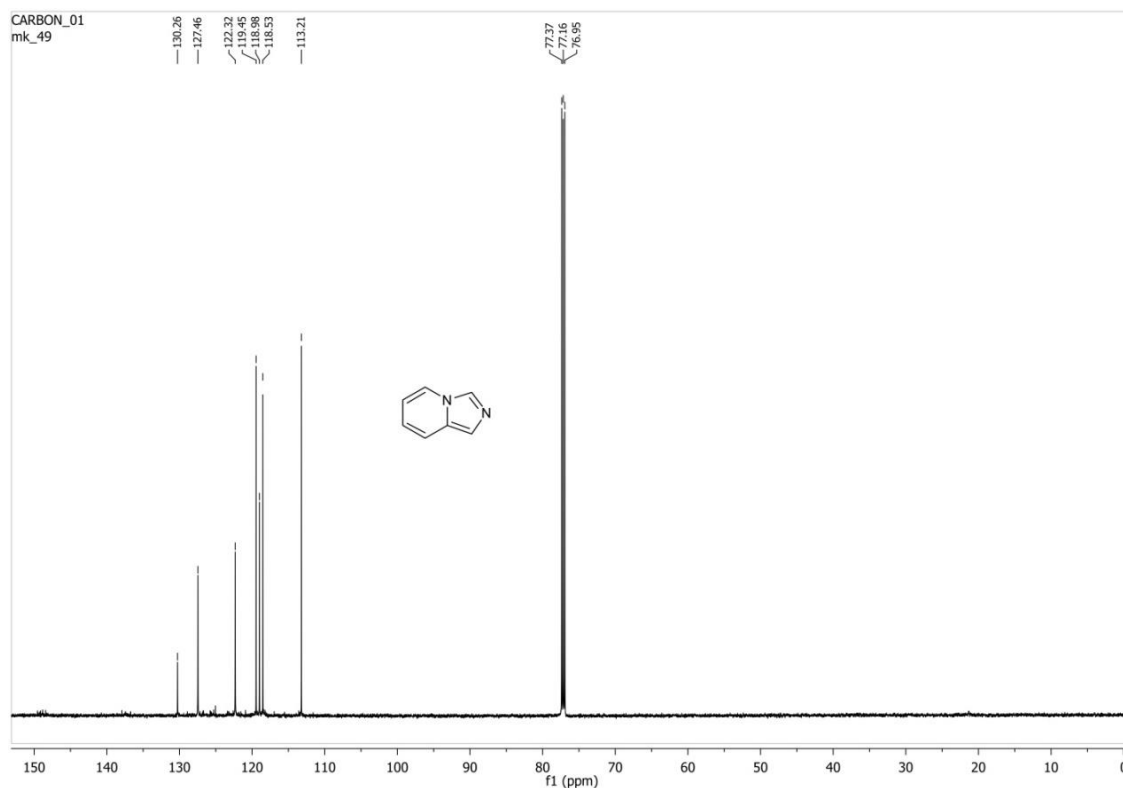

Figure S69.  $^{13}\text{C}$ -NMR spectrum of DE.

Sample Group  
Acquisition SW  
Version

6200 series TOF/6500 series  
Q-TOF B.05.01 (B5125)

Info.

Compound Table

| Compound Label   | RT  | Mass     | Formula  | MFG Formula | MFG Diff (ppm) | DB Formula |
|------------------|-----|----------|----------|-------------|----------------|------------|
| Cpd 16: C7 H6 N2 | 0.3 | 118.0529 | C7 H6 N2 | C7 H6 N2    | 1.9            | C7 H6 N2   |

| Compound Label   | m/z    | RT  | Algorithm                 | Mass     |
|------------------|--------|-----|---------------------------|----------|
| Cpd 16: C7 H6 N2 | 119.06 | 0.3 | Find by Molecular Feature | 118.0529 |

MFE MS Spectrum

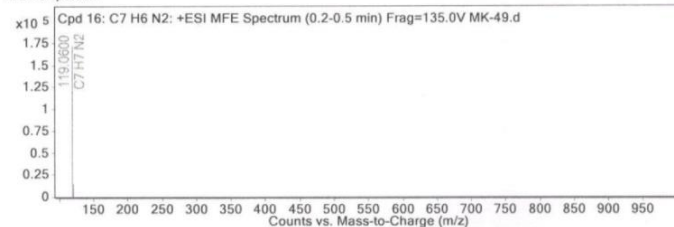

MS Spectrum Peak List

| m/z      | z | Abund     | Formula  | Ion    |
|----------|---|-----------|----------|--------|
| 119.06   | 1 | 171840.09 | C7 H7 N2 | (M+H)+ |
| 120.0634 | 1 | 14619.34  | C7 H7 N2 | (M+H)+ |
| 121.0733 | 1 | 1448.69   | C7 H7 N2 | (M+H)+ |

Predicted Isotope Match Table

| Isotope | m/z      | Calc m/z | Diff (ppm) | Abund % | Calc Abund % | Abund Sum % | Calc Abund Sum % |
|---------|----------|----------|------------|---------|--------------|-------------|------------------|
| 1       | 119.06   | 119.0604 | 2.75       | 100     | 100          | 91.45       | 92               |
| 2       | 120.0634 | 120.0632 | -1.99      | 8.51    | 8.38         | 7.78        | 7.71             |
| 3       | 121.0733 | 121.066  | -60.91     | 0.84    | 0.31         | 0.77        | 0.28             |

--- End Of Report ---

Figure S70. HRMS spectrum of DE.

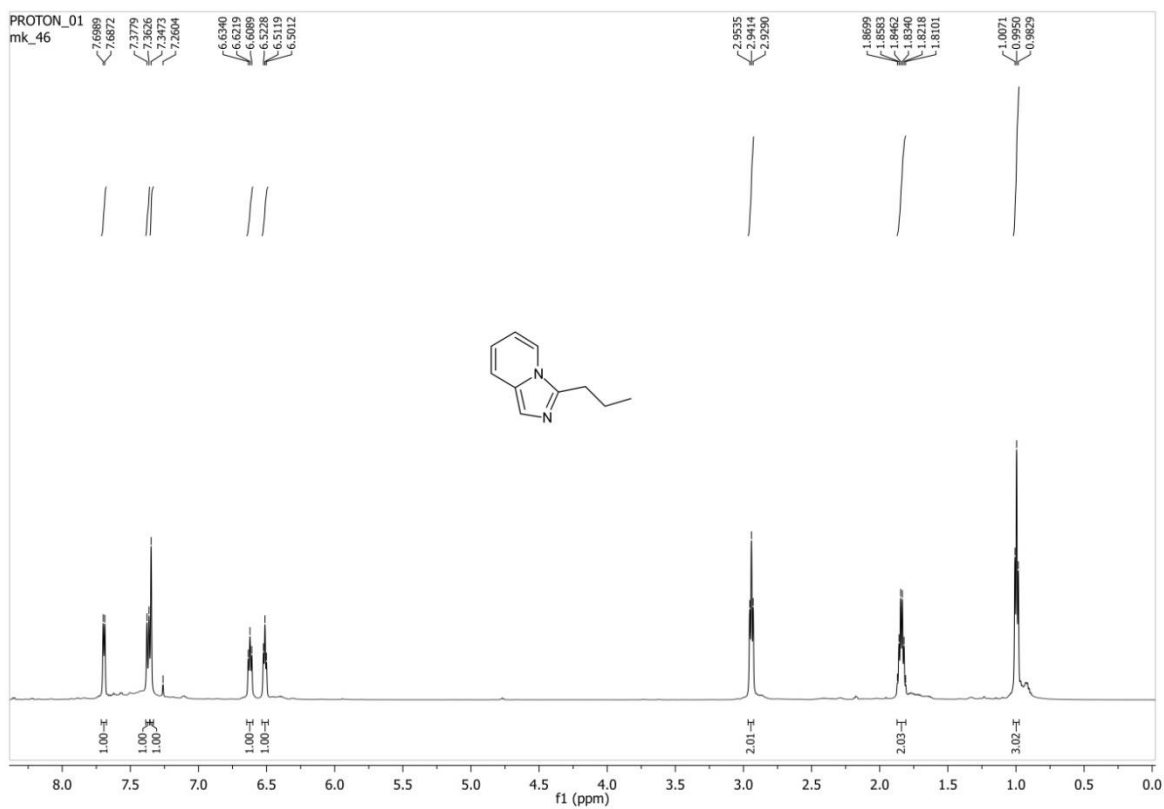

Figure S71.  $^1\text{H}$ -NMR spectrum of DG.

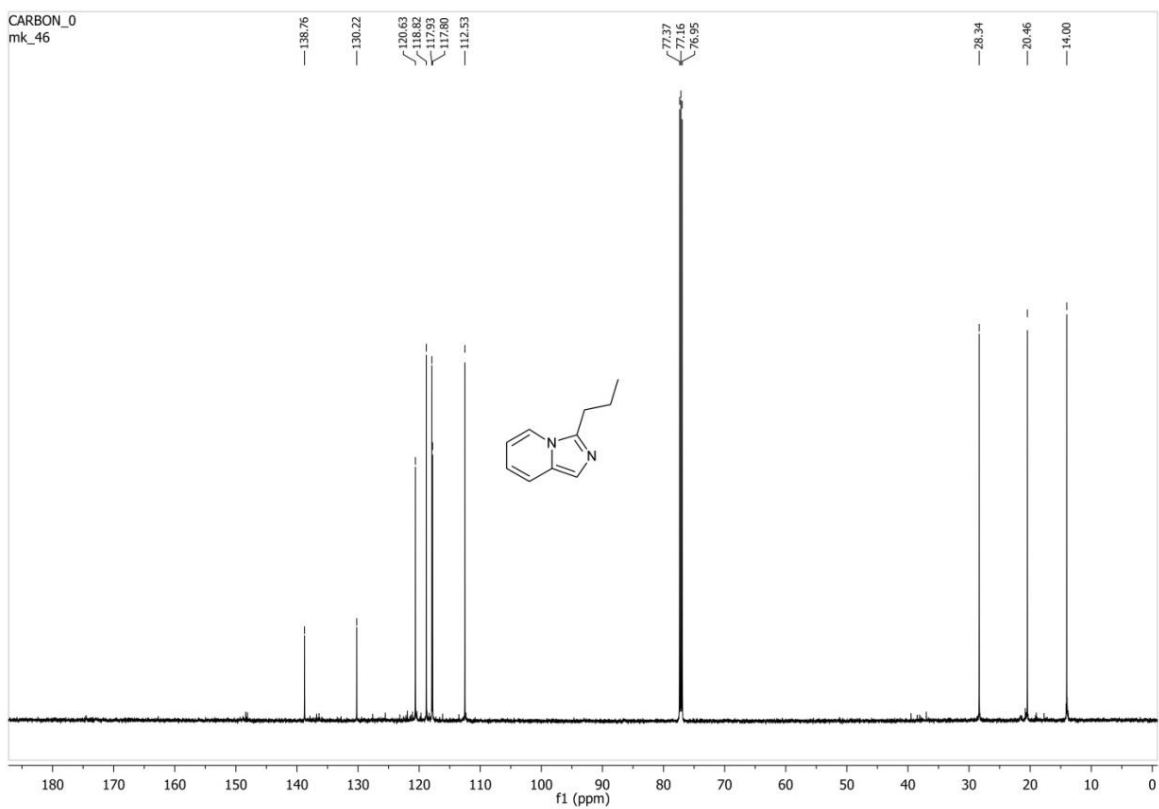

Figure S72.  $^{13}\text{C}$ -NMR spectrum of DG.

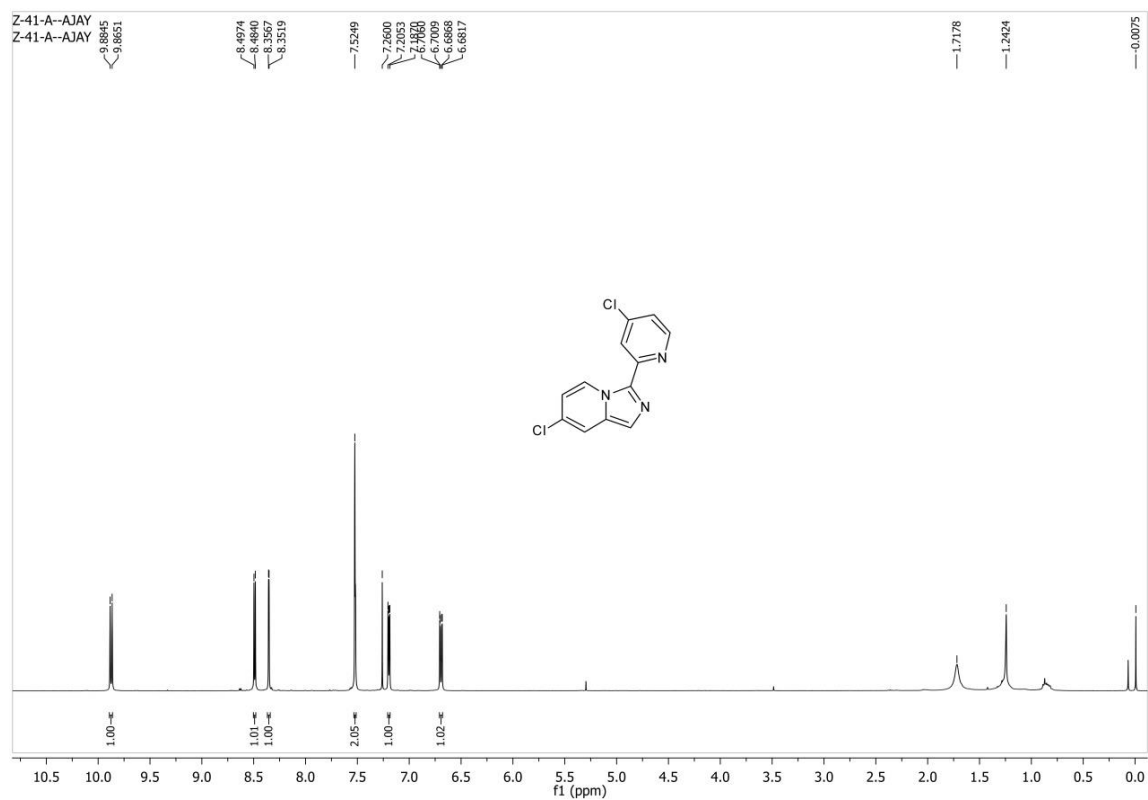

**Figure S73.** <sup>1</sup>H-NMR spectrum of **JJ**.

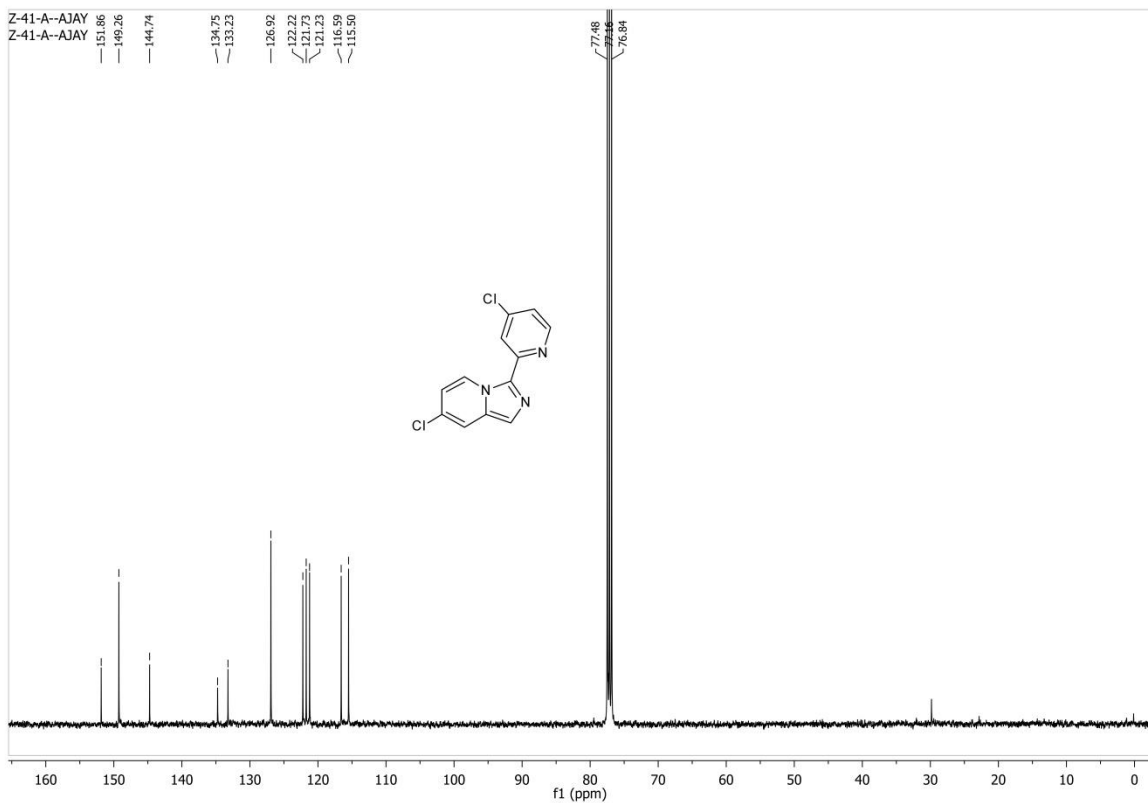

**Figure S74.** <sup>13</sup>C-NMR spectrum of **JJ**.

Compound Table

| Compound Label       | RT  | Mass     | Formula       | MFG Formula   | MFG Diff (ppm) | DB Formula    |
|----------------------|-----|----------|---------------|---------------|----------------|---------------|
| Cpd 1: C12 H7 Cl2 N3 | 0.4 | 263.0014 | C12 H7 Cl2 N3 | C12 H7 Cl2 N3 | 1.2            | C12 H7 Cl2 N3 |

| Compound Label       | m/z      | RT  | Algorithm                 | Mass     |
|----------------------|----------|-----|---------------------------|----------|
| Cpd 1: C12 H7 Cl2 N3 | 264.0087 | 0.4 | Find by Molecular Feature | 263.0014 |

MFE MS Spectrum

Cpd 1: C12 H7 Cl2 N3: +ESI MFE Spectrum (0.3-0.6 min) Frag=135.0V DD2O.d

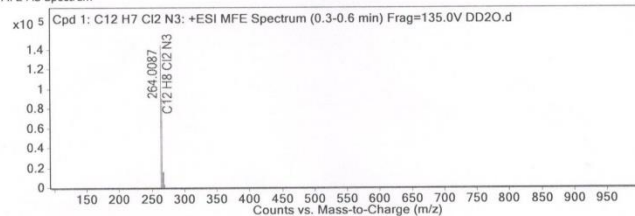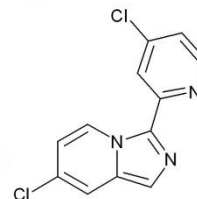

MS Spectrum Peak List

| m/z      | z | Abund     | Formula       | Ion    |
|----------|---|-----------|---------------|--------|
| 264.0087 | 1 | 144704.17 | C12 H8 Cl2 N3 | (M+H)+ |
| 265.0119 | 1 | 17762.06  | C12 H8 Cl2 N3 | (M+H)+ |
| 266.0057 | 1 | 89818.07  | C12 H8 Cl2 N3 | (M+H)+ |
| 267.0086 | 1 | 15292.38  | C12 H8 Cl2 N3 | (M+H)+ |
| 268.0032 | 1 | 16522.58  | C12 H8 Cl2 N3 | (M+H)+ |
| 269.0073 | 1 | 2885.06   | C12 H8 Cl2 N3 | (M+H)+ |

Predicted Isotope Match Table

| Isotope | m/z      | Calc m/z | Diff (ppm) | Abund % | Calc Abund % | Abund Sum % | Calc Abund Sum % |
|---------|----------|----------|------------|---------|--------------|-------------|------------------|
| 1       | 264.0087 | 264.009  | 1.04       | 100     | 100          | 50.42       | 49.87            |
| 2       | 265.0119 | 265.0119 | -0.12      | 12.27   | 14.17        | 6.19        | 7.07             |
| 3       | 266.0057 | 266.0062 | 1.79       | 62.07   | 64.92        | 31.3        | 32.38            |
| 4       | 267.0086 | 267.0089 | 1.49       | 10.57   | 9.1          | 5.33        | 4.54             |
| 5       | 268.0032 | 268.0036 | 1.31       | 11.42   | 10.83        | 5.76        | 5.4              |
| 6       | 269.0073 | 269.0061 | -4.33      | 1.99    | 1.47         | 1.01        | 0.74             |

--- End Of Report ---

Figure S75. HRMS spectrum of JJ.

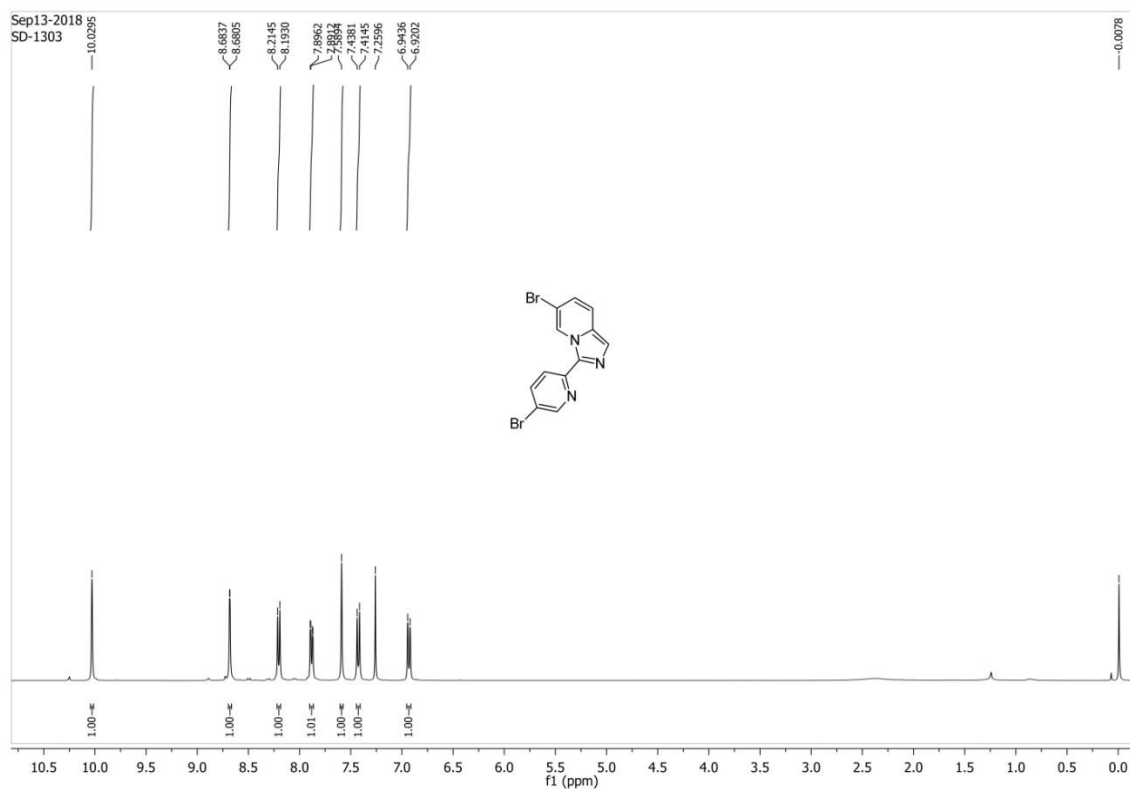Figure S76. <sup>1</sup>H-NMR spectrum of KK.

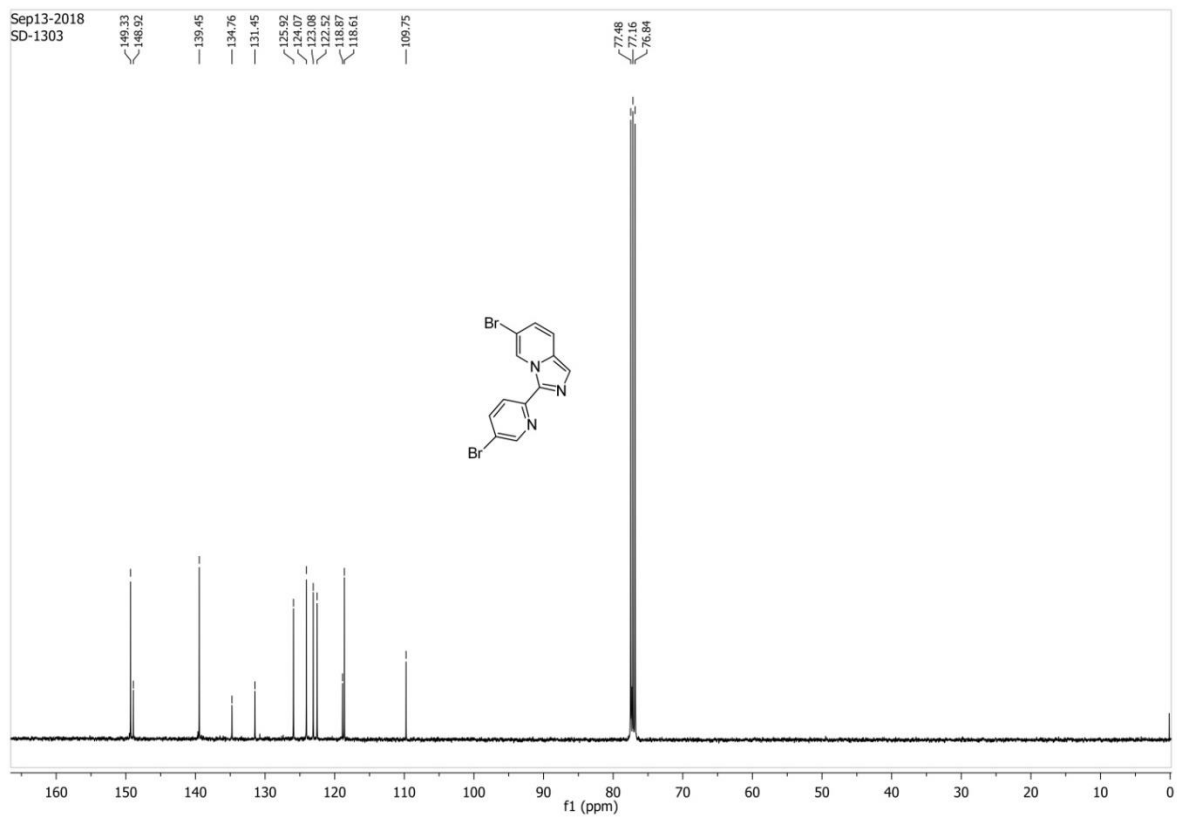

**Figure S77.**  $^{13}\text{C}$ -NMR spectrum of KK.

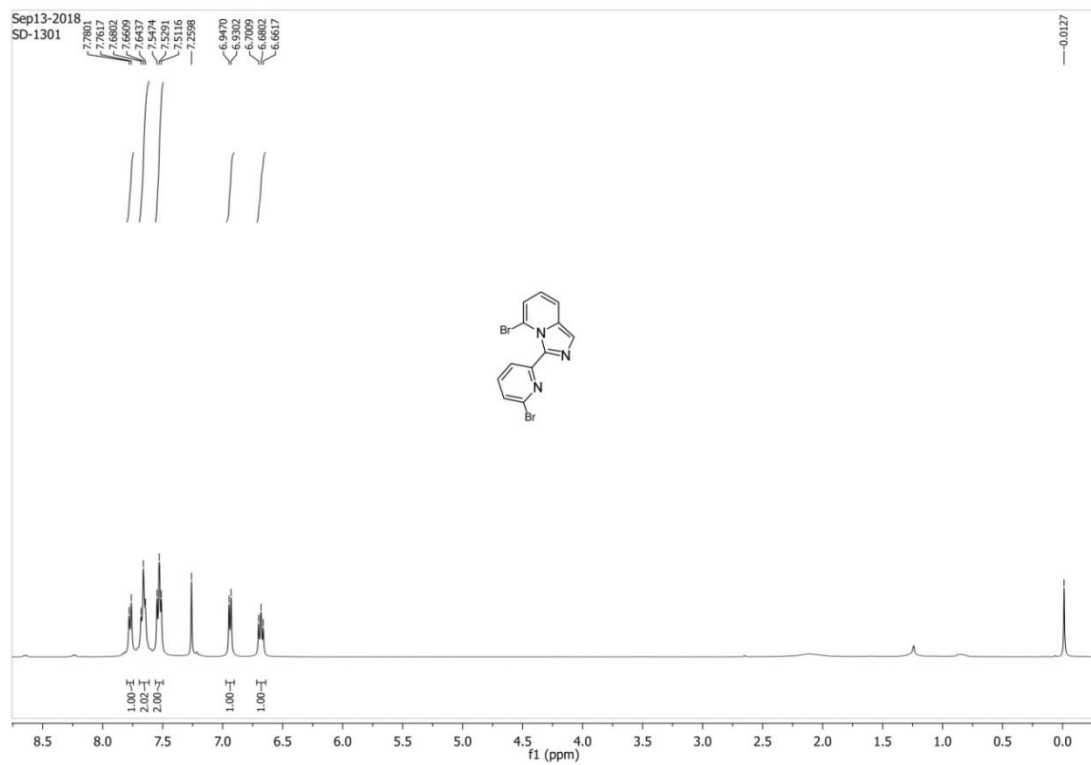

**Figure S78.**  $^1\text{H}$ -NMR spectrum of LL.

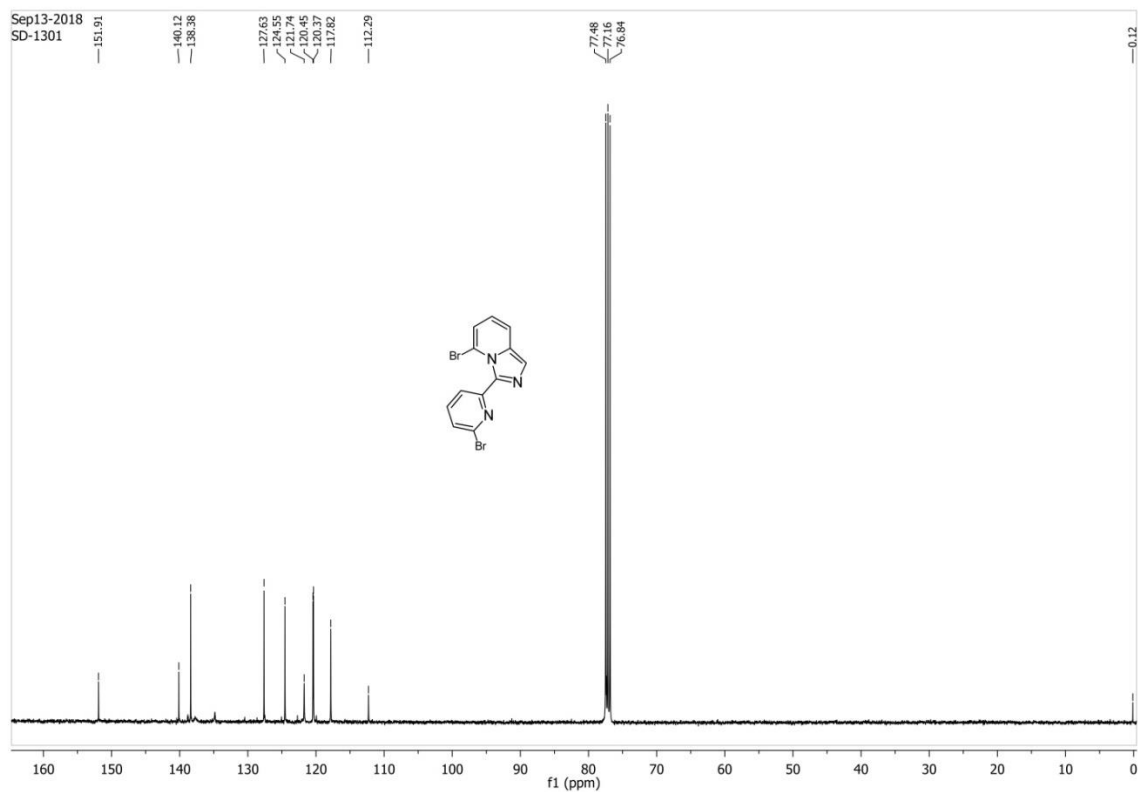

Figure S79.  $^{13}\text{C}$ -NMR spectrum of LL.

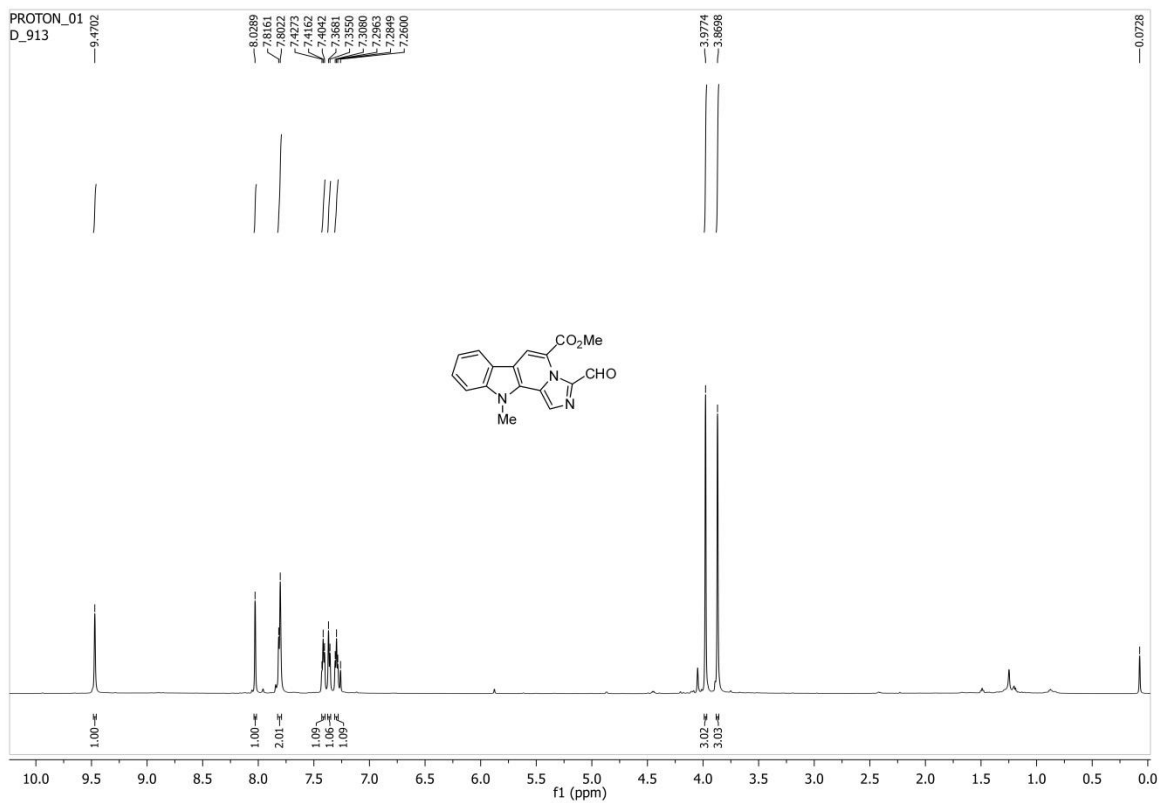

Figure S80.  $^1\text{H}$ -NMR spectrum of 2aK.

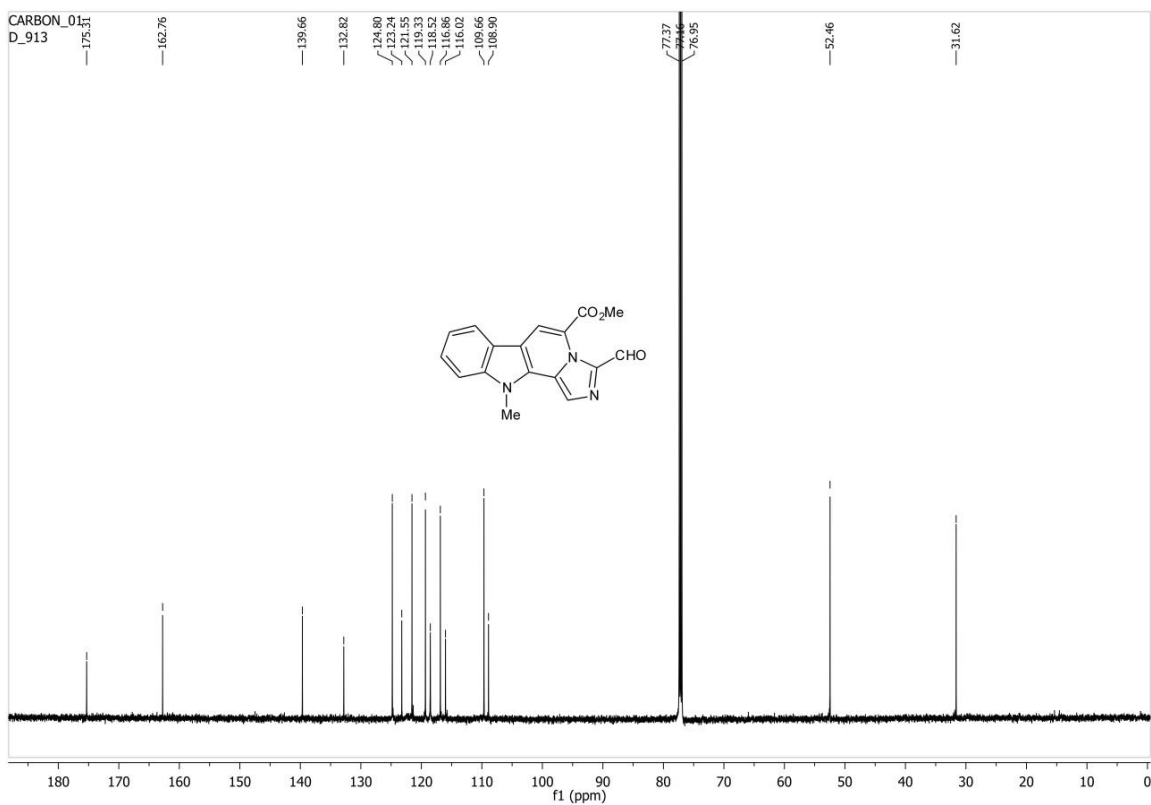

Figure S81.  $^{13}\text{C}$ -NMR spectrum of 2aK.

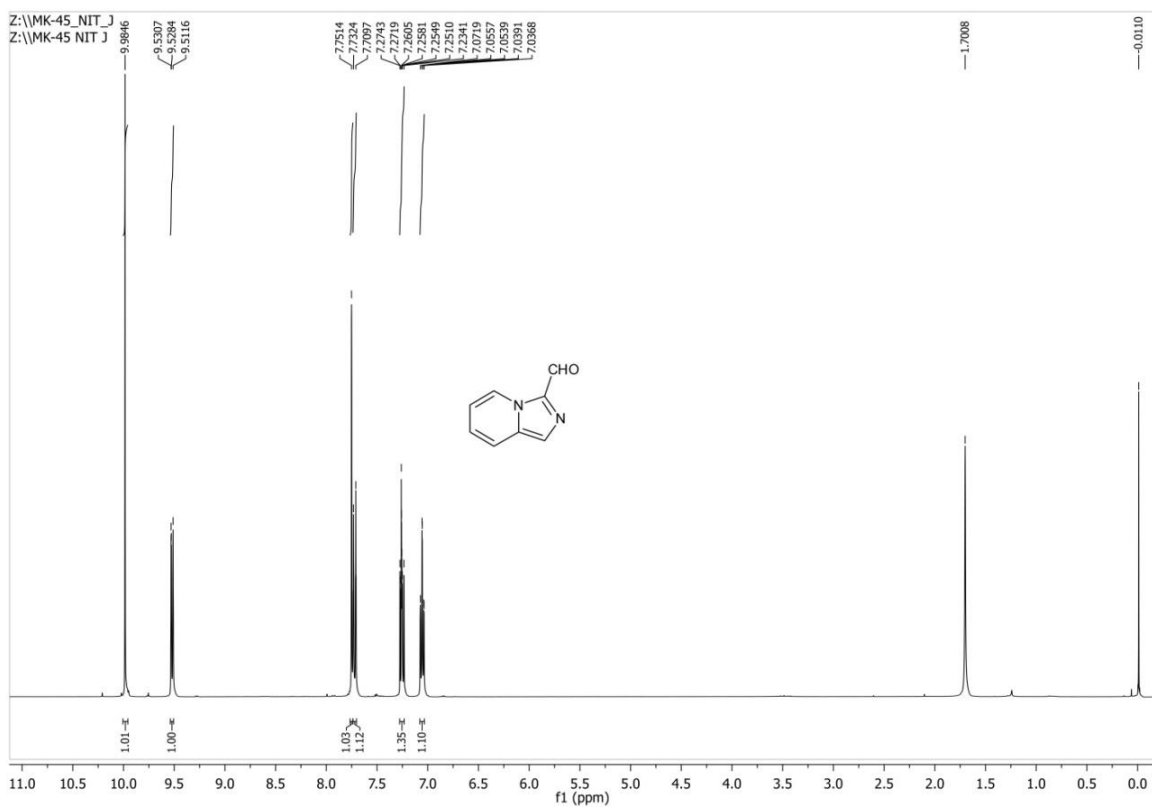

Figure S82.  $^1\text{H}$ -NMR spectrum of 2DK.

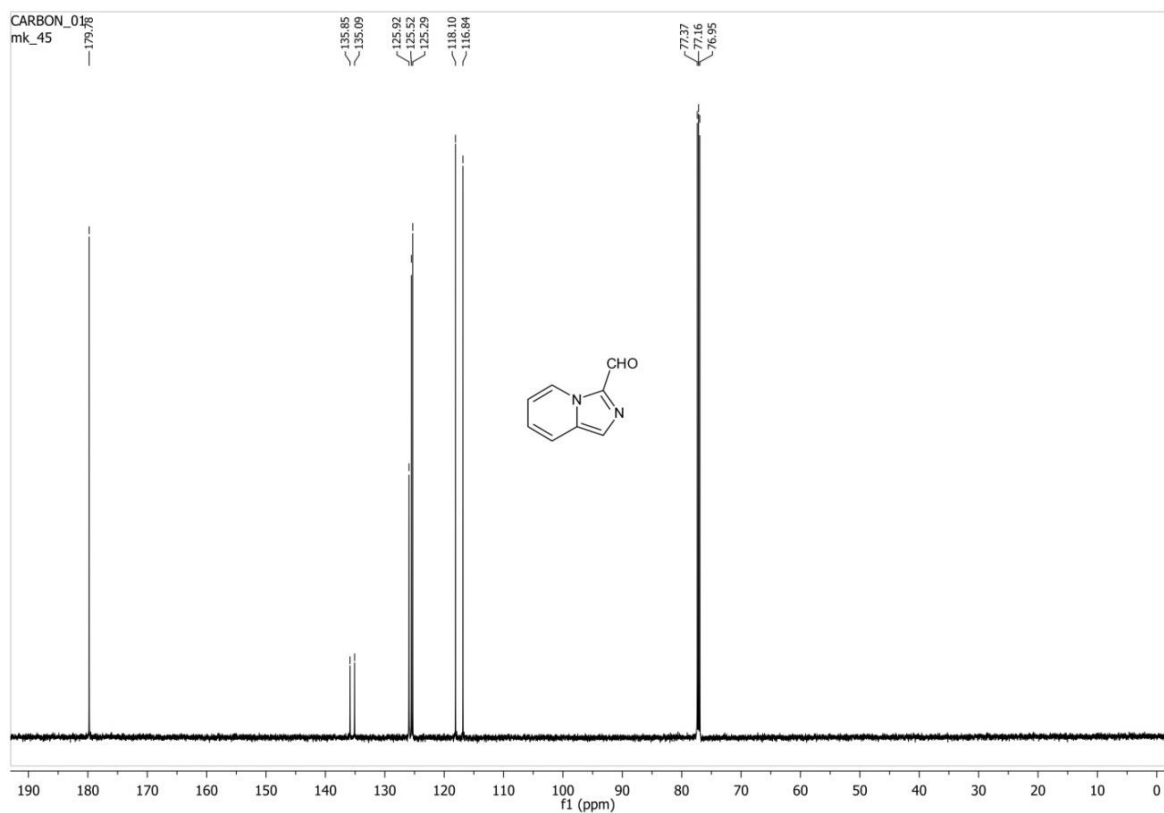

Figure S83. <sup>13</sup>C-NMR spectrum of 2DK.

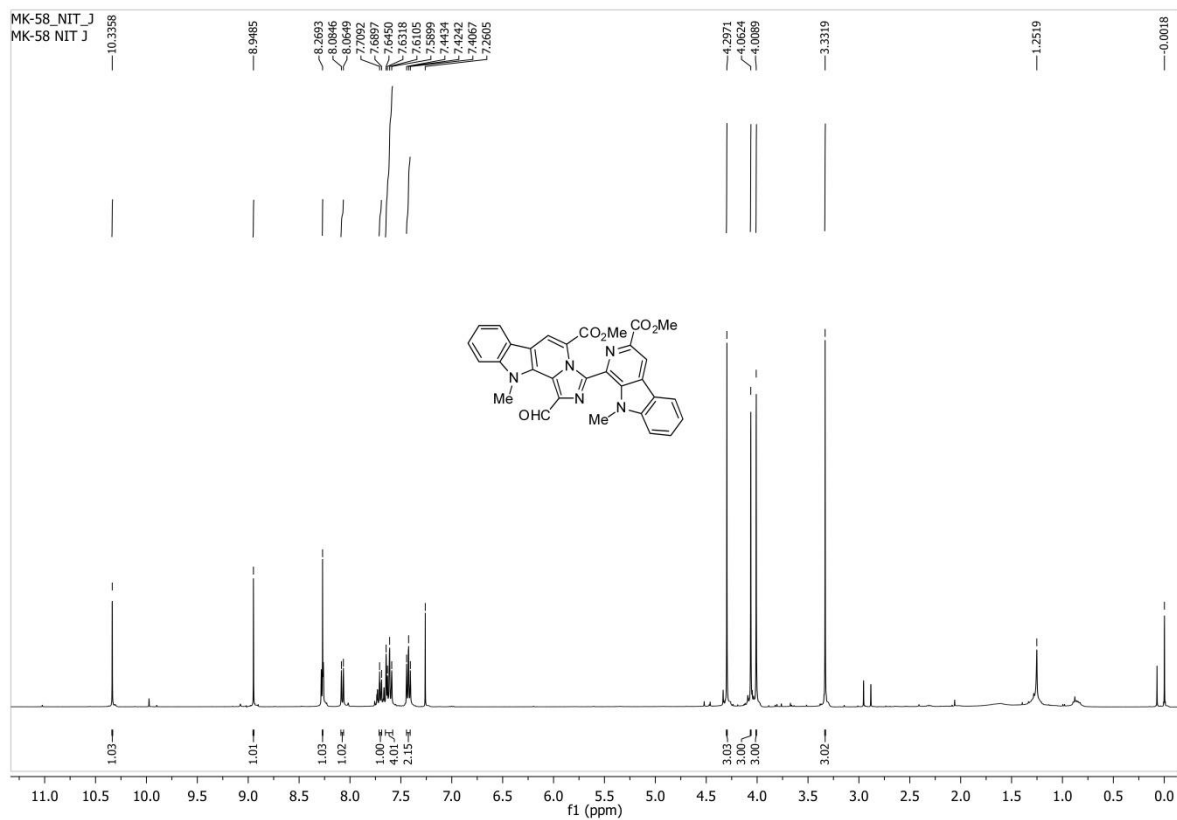

Figure S84. <sup>1</sup>H-NMR spectrum of 6.



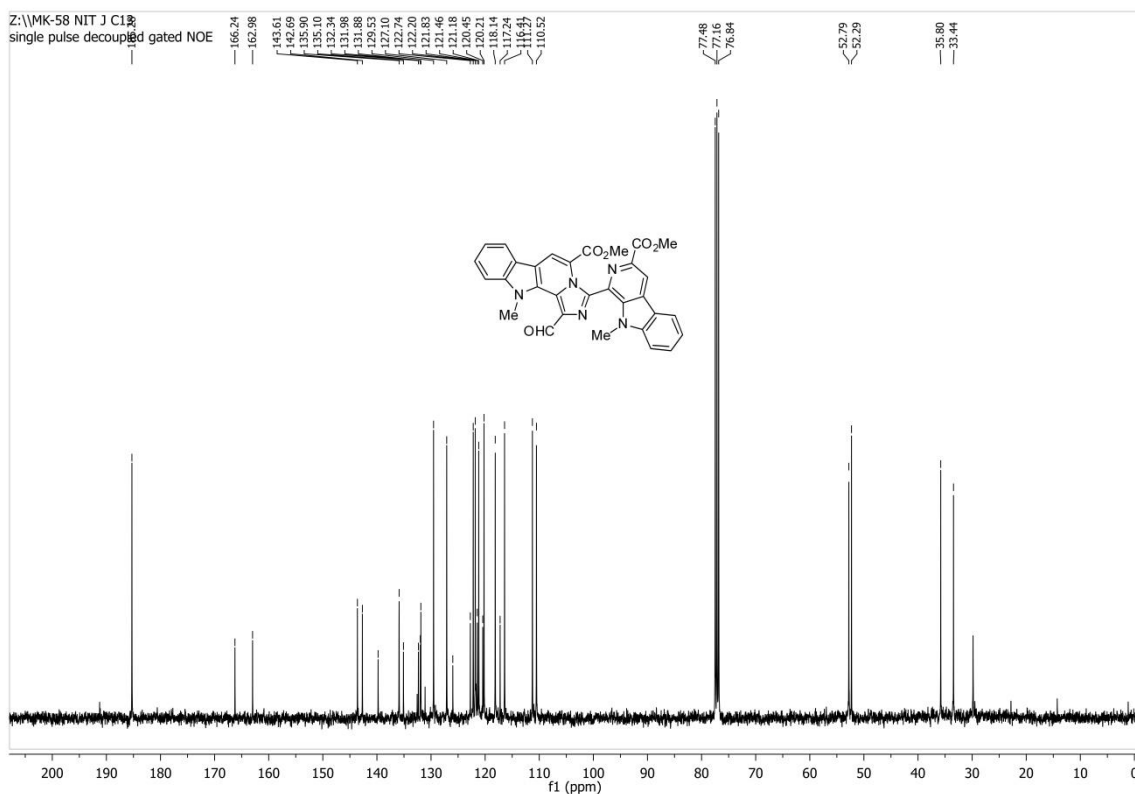

Figure S85.  $^{13}\text{C}$ -NMR spectrum of **6**.

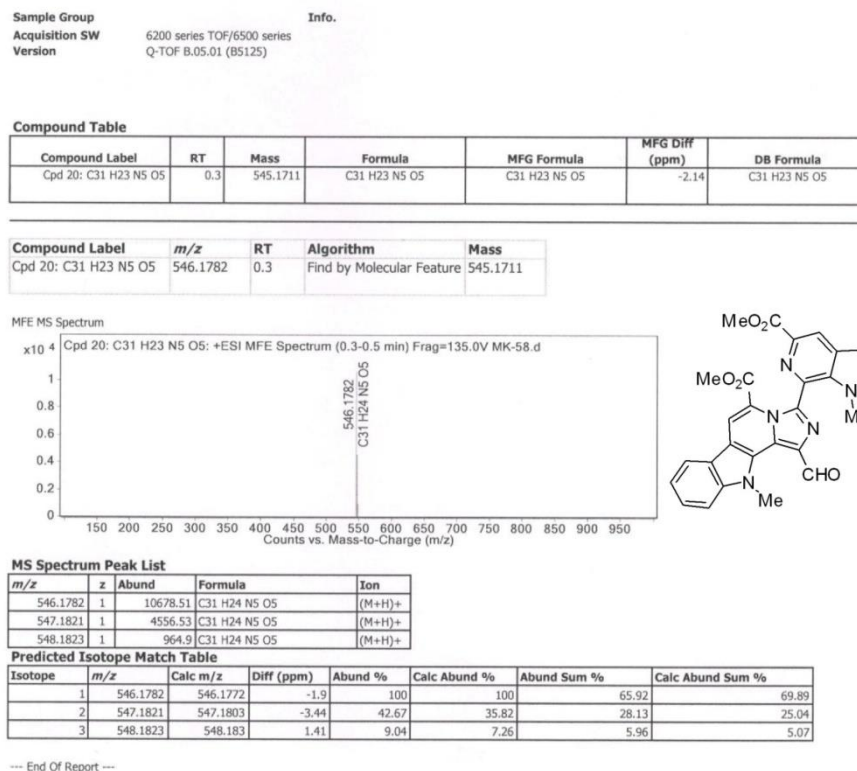

Figure S86. HRMS spectrum of **6**.



Sample Group  
Acquisition SW  
Version

Info.  
6200 series TOF/6500 series  
Q-TOF B.05.01 (B5125)

#### Compound Table

| Compound Label     | RT  | Mass     | Formula     | MFG Formula | MFG Diff (ppm) | DB Formula  |
|--------------------|-----|----------|-------------|-------------|----------------|-------------|
| Cpd 8: C13 H9 N3 O | 0.3 | 223.0748 | C13 H9 N3 O | C13 H9 N3 O | -0.91          | C13 H9 N3 O |

| Compound Label     | m/z     | RT  | Algorithm                 | Mass     |
|--------------------|---------|-----|---------------------------|----------|
| Cpd 8: C13 H9 N3 O | 224.082 | 0.3 | Find by Molecular Feature | 223.0748 |

#### MFE MS Spectrum

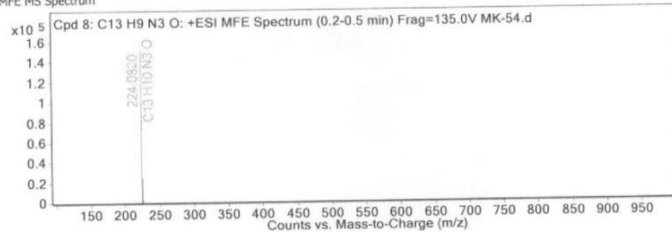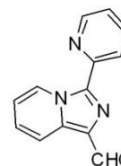

#### MS Spectrum Peak List

| m/z      | z | Abund    | Formula      | Ion    |
|----------|---|----------|--------------|--------|
| 224.082  | 1 | 151519.2 | C13 H10 N3 O | (M+H)+ |
| 225.0852 | 1 | 24587.4  | C13 H10 N3 O | (M+H)+ |
| 226.0882 | 1 | 2212.89  | C13 H10 N3 O | (M+H)+ |

#### Predicted Isotope Match Table

| Isotope | m/z      | Calc m/z | Diff (ppm) | Abund % | Calc Abund % | Abund Sum % | Calc Abund Sum % |
|---------|----------|----------|------------|---------|--------------|-------------|------------------|
| 1       | 224.082  | 224.0818 | -0.7       | 100     | 100          | 84.97       | 85.76            |
| 2       | 225.0852 | 225.0848 | -1.92      | 16.23   | 15.31        | 13.79       | 13.13            |
| 3       | 226.0882 | 226.0874 | -3.42      | 1.46    | 1.3          | 1.24        | 1.11             |

--- End Of Report ---

Figure S89. HRMS spectrum of 7.

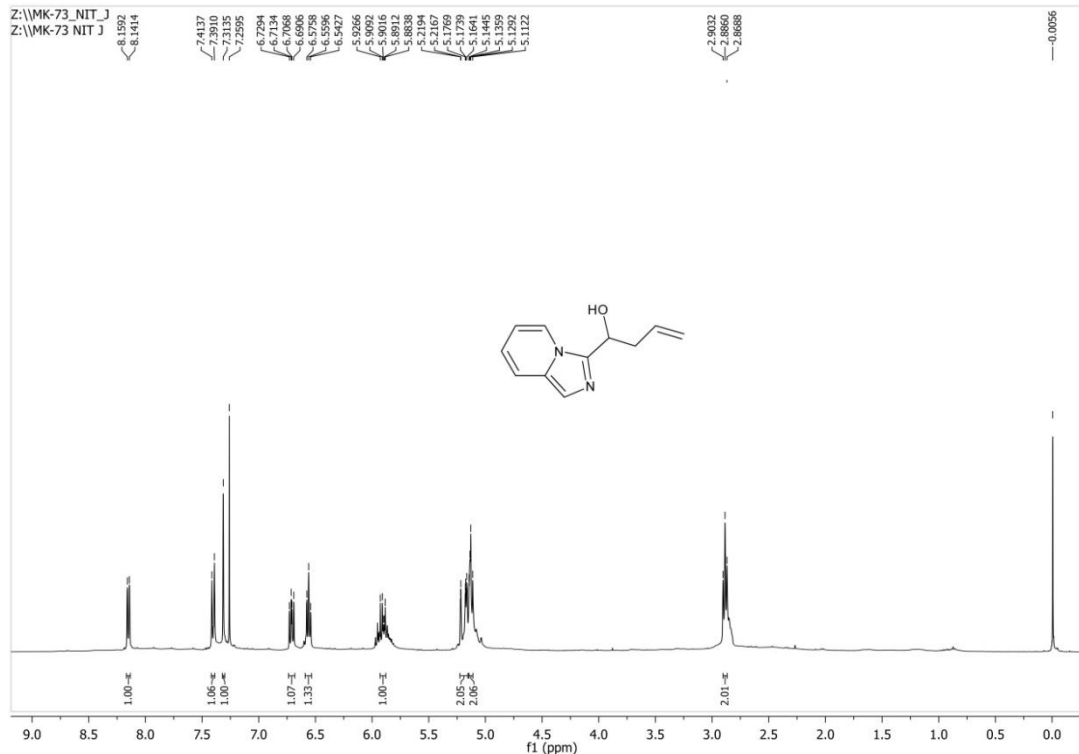

Figure S90. <sup>1</sup>H-NMR spectrum of 8.

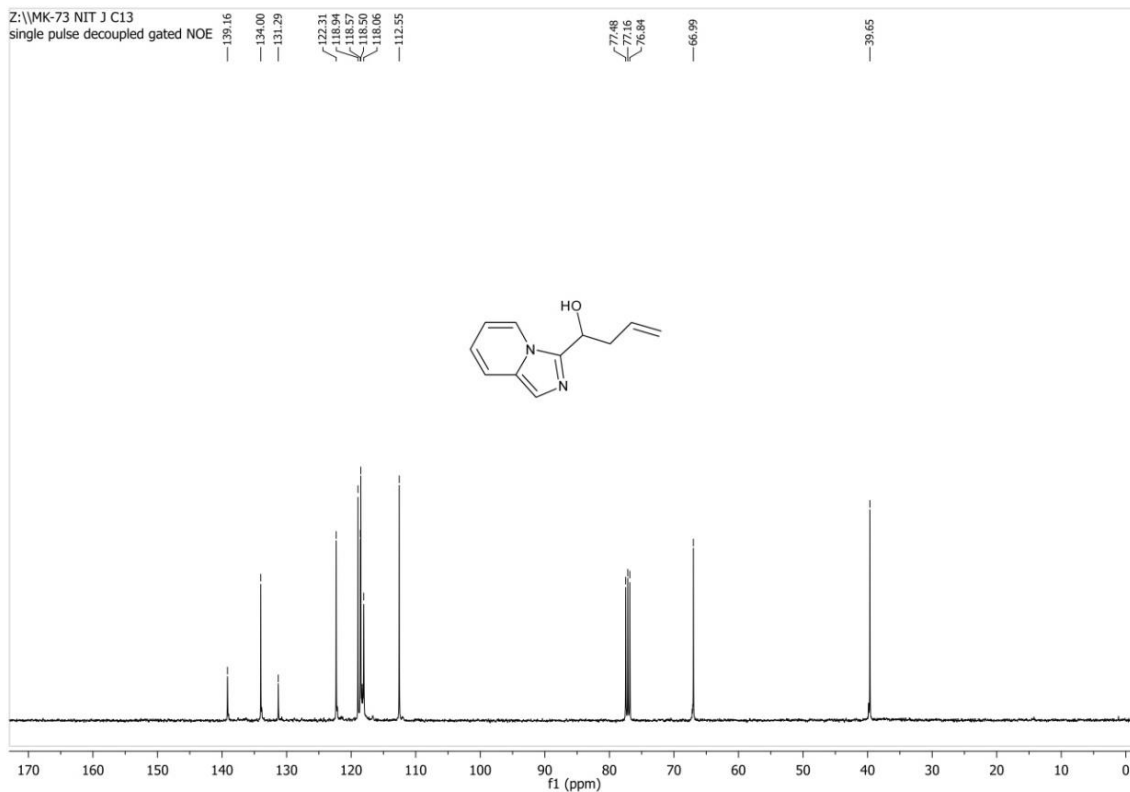

Figure S91.  $^{13}\text{C}$ -NMR spectrum of **8**.

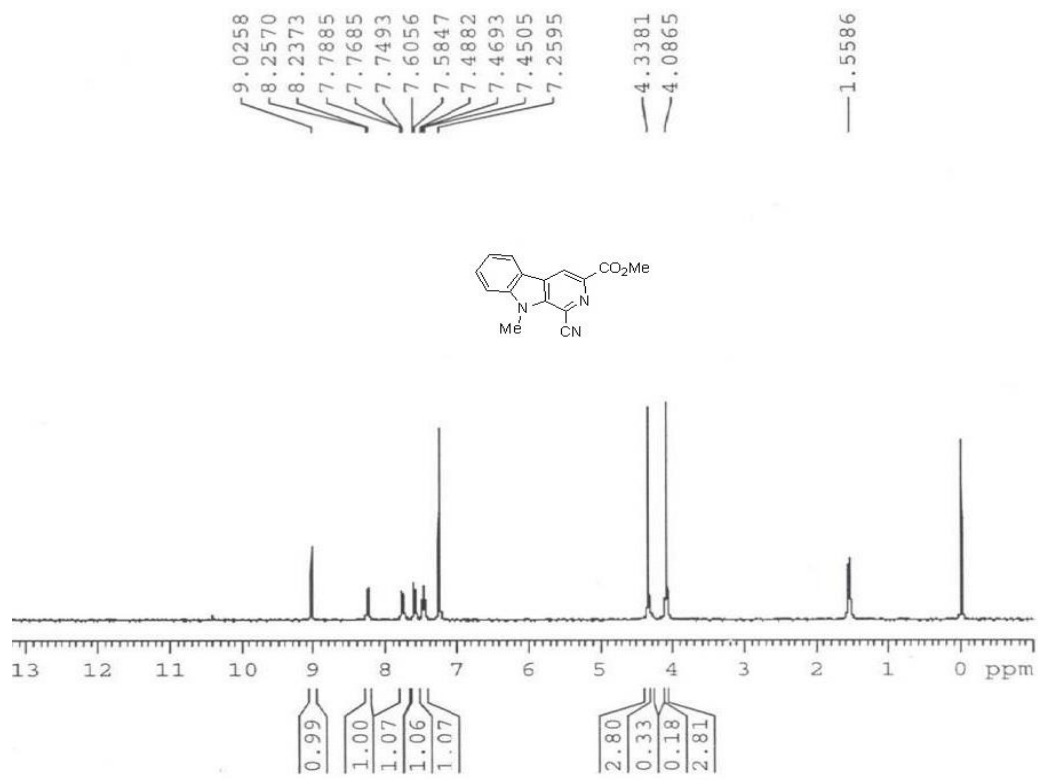

Figure S92.  $^1\text{H}$ -NMR spectrum of **5a**.

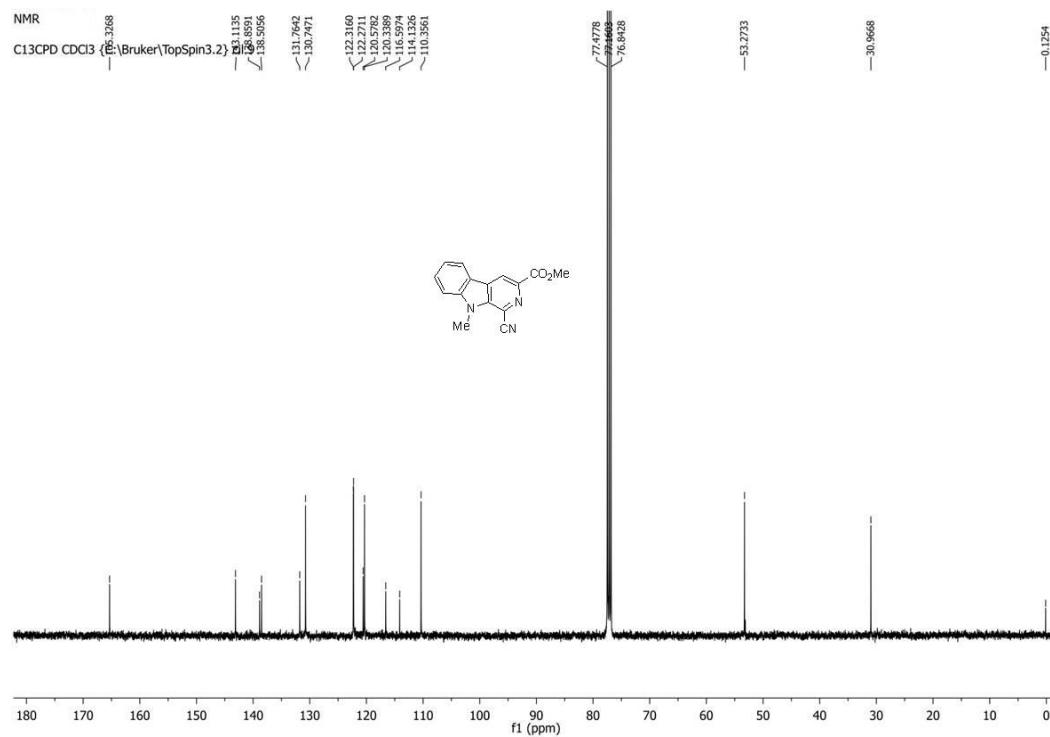

Figure S93. <sup>13</sup>C-NMR spectrum of 5a.

## Photophysical studies of synthesised compounds

The fluorescent quantum yield ( $\Phi$ ) was measured relative to quinine sulfate ( $\Phi_R = 0.546$ ) (0.1 M H<sub>2</sub>SO<sub>4</sub> at 350 nm excitation) as a reference compound. For the measurement of UV-Vis absorption and fluorescence emission of samples, stock solution (1.0 mM) was prepared and diluted to final concentration (5.0  $\mu$ M) using anhydrous CHCl<sub>3</sub>. These QY were calculated as equation:

$$\Phi_S = \Phi_R \times \frac{I_S}{I_R} \times \frac{A_R}{A_S} \times \frac{\eta_S^2}{\eta_R^2}$$

$R$  – Reference;  $S$  - Sample

where  $\Phi_R$  was the quantum yields of quinine sulfate,  $\eta$  was the refractive index of the solvent,  $I$  was the integrated fluorescence intensity and  $A$  was the absorbance. The concentration of samples should be sufficiently diluted not to occur concentration quenching.

**Figure S94.** Photophysical properties and graphical data of  $\beta$ -carboline dimers (**4a-I** and **6**).

| 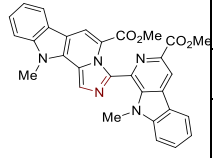<br><b>4a</b> | UV-Vis              | Fluorescence        |                 | $\Phi_F$       |
|--------------------------------------------------------------------------------------------------|---------------------|---------------------|-----------------|----------------|
|                                                                                                  | $\lambda_{Ex}$ (nm) | $\lambda_{Em}$ (nm) | Intensity       |                |
|                                                                                                  | 288.89<br>381.37    | 495.90<br>494.43    | 116.46<br>40.82 |                |
|                                                                                                  |                     |                     |                 | 0.107<br>0.136 |

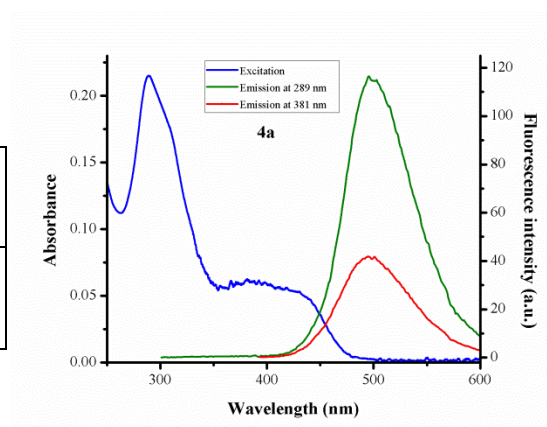

| 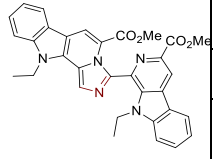<br><b>4b</b> | UV-Vis              | Fluorescence        |                 | $\Phi_F$       |
|--------------------------------------------------------------------------------------------------|---------------------|---------------------|-----------------|----------------|
|                                                                                                  | $\lambda_{Ex}$ (nm) | $\lambda_{Em}$ (nm) | Intensity       |                |
|                                                                                                  | 289.63<br>366.18    | 496.96<br>497.02    | 115.75<br>36.28 |                |
|                                                                                                  |                     |                     |                 | 0.112<br>0.127 |

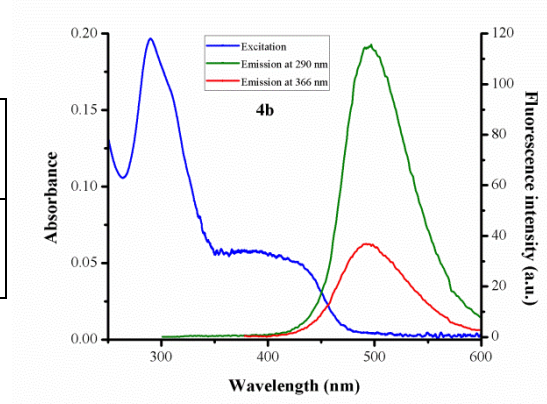

| 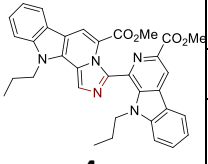<br><b>4c</b> | UV-Vis              | Fluorescence        |                | $\Phi_F$ |
|------------------------------------------------------------------------------------------------|---------------------|---------------------|----------------|----------|
|                                                                                                | $\lambda_{Ex}$ (nm) | $\lambda_{Em}$ (nm) | Intensity      |          |
|                                                                                                | 286.53<br>380.58    | 498.03<br>492.27    | 97.36<br>35.17 |          |

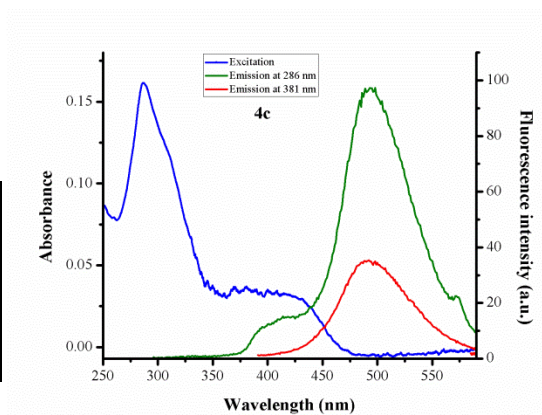

| 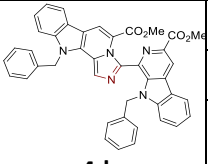<br><b>4d</b> | UV-Vis              | Fluorescence        |                | $\Phi_F$ |
|------------------------------------------------------------------------------------------------|---------------------|---------------------|----------------|----------|
|                                                                                                | $\lambda_{Ex}$ (nm) | $\lambda_{Em}$ (nm) | Intensity      |          |
|                                                                                                | 287.08<br>366.70    | 496.96<br>489.94    | 78.59<br>35.15 |          |

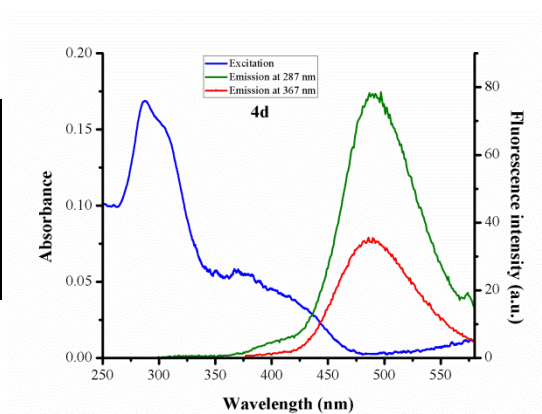

| 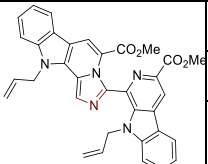<br><b>4e</b> | UV-Vis              | Fluorescence        |                 | $\Phi_F$ |
|--------------------------------------------------------------------------------------------------|---------------------|---------------------|-----------------|----------|
|                                                                                                  | $\lambda_{Ex}$ (nm) | $\lambda_{Em}$ (nm) | Intensity       |          |
|                                                                                                  | 287.29<br>371.83    | 492.87<br>491.33    | 118.02<br>42.21 |          |

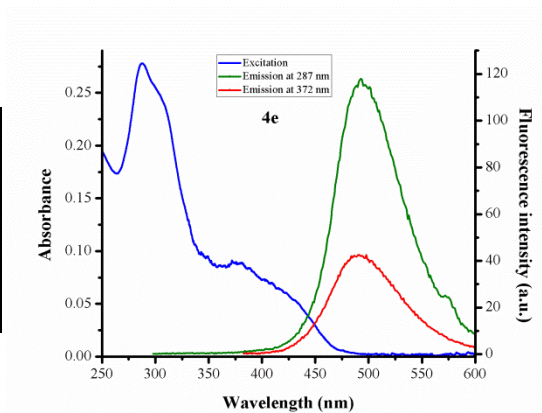

| 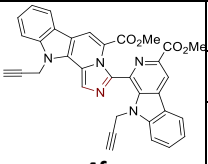<br><b>4f</b> | UV-Vis              | Fluorescence        |                 | $\Phi_F$ |
|--------------------------------------------------------------------------------------------------|---------------------|---------------------|-----------------|----------|
|                                                                                                  | $\lambda_{Ex}$ (nm) | $\lambda_{Em}$ (nm) | Intensity       |          |
|                                                                                                  | 285.59<br>373.32    | 488.05<br>484.92    | 118.38<br>59.81 |          |

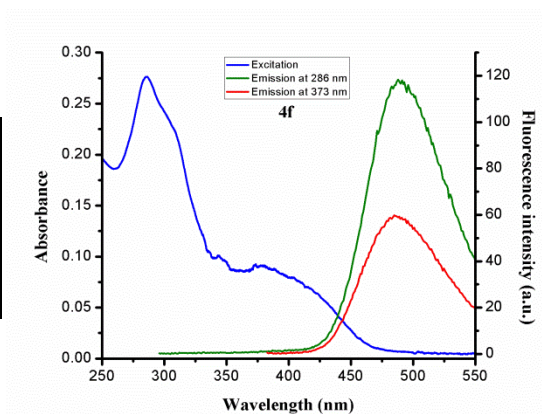

| 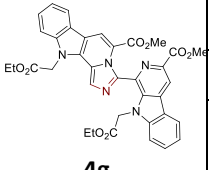<br><b>4g</b> | UV-Vis              |  | Fluorescence        |           | $\Phi_F$ |
|------------------------------------------------------------------------------------------------|---------------------|--|---------------------|-----------|----------|
|                                                                                                | $\lambda_{Ex}$ (nm) |  | $\lambda_{Em}$ (nm) | Intensity |          |
|                                                                                                | 286.66              |  | 482.98              | 87.09     |          |
|                                                                                                | 370.69              |  | 479.75              | 43.41     | 0.127    |

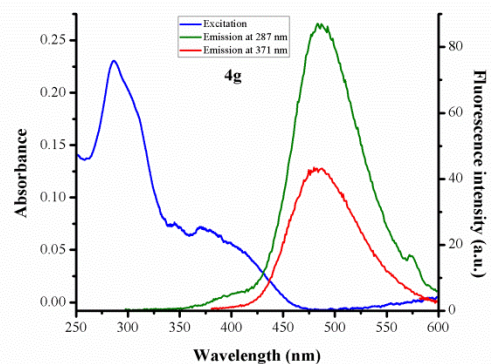

| 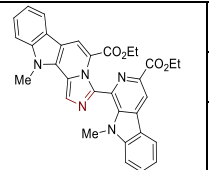<br><b>4h</b> | UV-Vis              |  | Fluorescence        |           | $\Phi_F$ |
|------------------------------------------------------------------------------------------------|---------------------|--|---------------------|-----------|----------|
|                                                                                                | $\lambda_{Ex}$ (nm) |  | $\lambda_{Em}$ (nm) | Intensity |          |
|                                                                                                | 288.23              |  | 501.04              | 137.35    |          |
|                                                                                                | 384.10              |  | 499.26              | 46.24     | 0.158    |

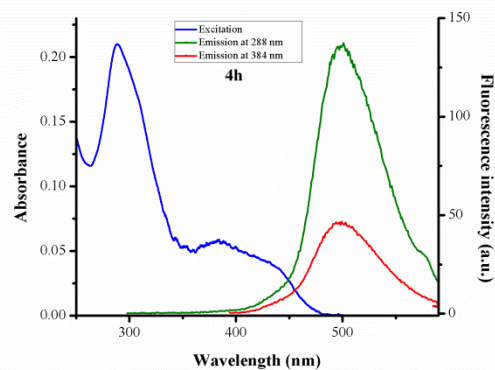

| 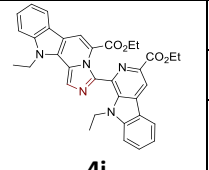<br><b>4i</b> | UV-Vis              |  | Fluorescence        |           | $\Phi_F$ |
|--------------------------------------------------------------------------------------------------|---------------------|--|---------------------|-----------|----------|
|                                                                                                  | $\lambda_{Ex}$ (nm) |  | $\lambda_{Em}$ (nm) | Intensity |          |
|                                                                                                  | 289.39              |  | 490.90              | 148.94    |          |
|                                                                                                  | 374.21              |  | 493.03              | 57.97     | 0.177    |

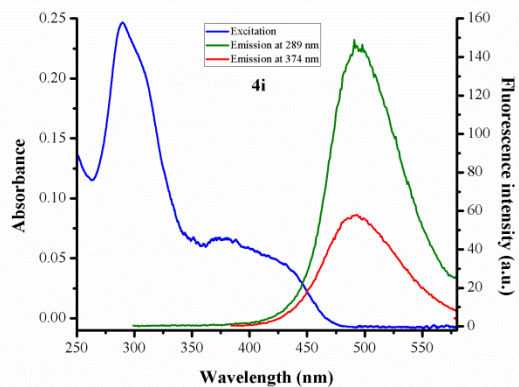

| 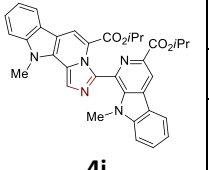<br><b>4j</b> | UV-Vis              |  | Fluorescence        |           | $\Phi_F$ |
|--------------------------------------------------------------------------------------------------|---------------------|--|---------------------|-----------|----------|
|                                                                                                  | $\lambda_{Ex}$ (nm) |  | $\lambda_{Em}$ (nm) | Intensity |          |
|                                                                                                  | 289.29              |  | 494.84              | 111.95    |          |
|                                                                                                  | 372.37              |  | 495.95              | 34.75     | 0.137    |

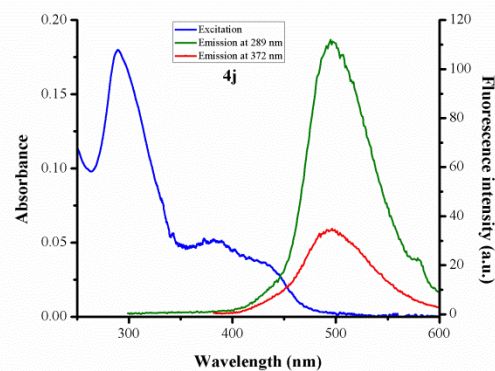



| 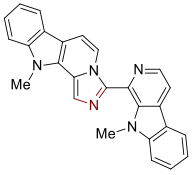<br><b>4k</b> | UV-Vis              | Fluorescence        |           | $\Phi_F$ |
|------------------------------------------------------------------------------------------------|---------------------|---------------------|-----------|----------|
|                                                                                                | $\lambda_{Ex}$ (nm) | $\lambda_{Em}$ (nm) | Intensity |          |
|                                                                                                | 253.30              | 508.95              | 64.55     | 0.055    |
|                                                                                                | 305.06              | 502.98              | 84.08     | 0.090    |
|                                                                                                | 393.14              | 499.33              | 32.18     | 0.115    |

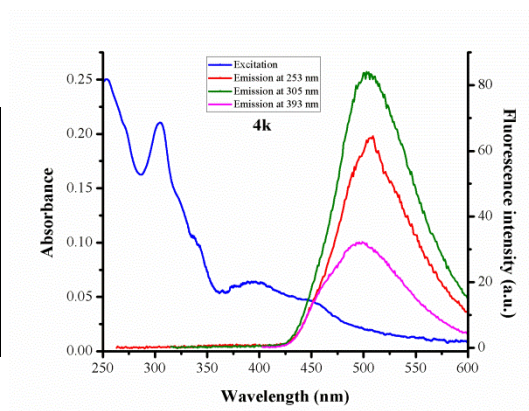

| 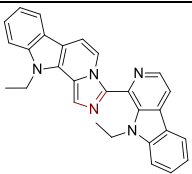<br><b>4l</b> | UV-Vis              | Fluorescence        |           | $\Phi_F$ |
|-------------------------------------------------------------------------------------------------|---------------------|---------------------|-----------|----------|
|                                                                                                 | $\lambda_{Ex}$ (nm) | $\lambda_{Em}$ (nm) | Intensity |          |
|                                                                                                 | 253.90              | 505.82              | 80.80     | 0.080    |
|                                                                                                 | 304.63              | 494.84              | 104.31    | 0.126    |
|                                                                                                 | 415.67              | 499.74              | 64.85     | 0.256    |

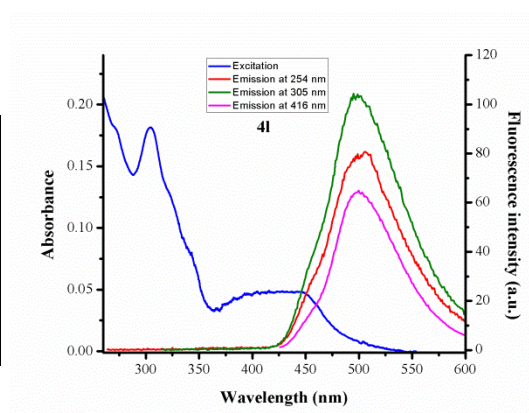

| 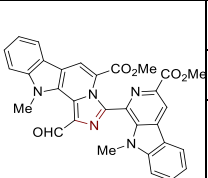<br><b>6</b> | UV-Vis              | Fluorescence        |           | $\Phi_F$ |
|-------------------------------------------------------------------------------------------------|---------------------|---------------------|-----------|----------|
|                                                                                                 | $\lambda_{Ex}$ (nm) | $\lambda_{Em}$ (nm) | Intensity |          |
|                                                                                                 | 282.14              | 465.09              | 89.80     | 0.096    |
|                                                                                                 | 327.08              | 463.93              | 90.41     | 0.111    |
|                                                                                                 | 371.82              | 463.99              | 67.47     | 0.120    |

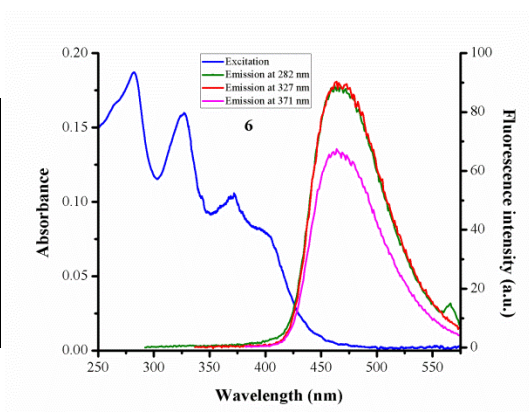

**Figure S95.** Photophysical properties and graphical data of imidazo[3,4-*b*]pyridine derivatives.

| 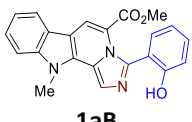<br><b>1aB</b> | UV-Vis              | Fluorescence        |           | $\Phi_F$ |
|-------------------------------------------------------------------------------------------------|---------------------|---------------------|-----------|----------|
|                                                                                                 | $\lambda_{Ex}$ (nm) | $\lambda_{Em}$ (nm) | Intensity |          |
|                                                                                                 | 314.81              | 510.61              | 15.73     |          |
|                                                                                                 | 355.62              | 516.06              | 12.47     | 0.021    |

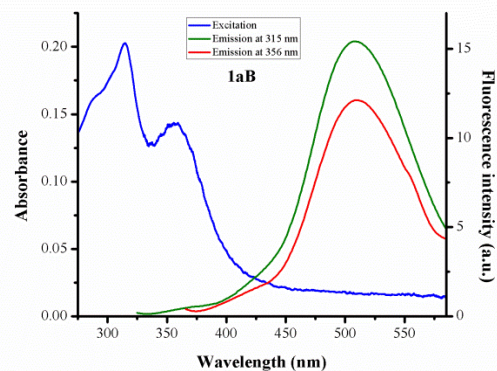

| 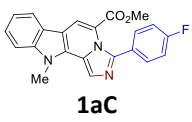<br><b>1aC</b> | UV-Vis              | Fluorescence        |           | $\Phi_F$ |
|-------------------------------------------------------------------------------------------------|---------------------|---------------------|-----------|----------|
|                                                                                                 | $\lambda_{Ex}$ (nm) | $\lambda_{Em}$ (nm) | Intensity |          |
|                                                                                                 | 308.51              | 495.54              | 44.03     |          |
|                                                                                                 | 351.59              | 505.86              | 24.69     | 0.108    |

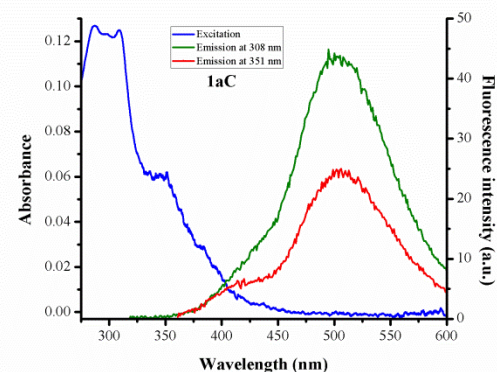

| 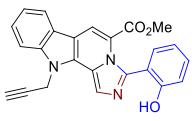<br><b>1fB</b> | UV-Vis              | Fluorescence        |           | $\Phi_F$ |
|---------------------------------------------------------------------------------------------------|---------------------|---------------------|-----------|----------|
|                                                                                                   | $\lambda_{Ex}$ (nm) | $\lambda_{Em}$ (nm) | Intensity |          |
|                                                                                                   | 312.51              | 514.11              | 10.93     |          |
|                                                                                                   | 351.00              | 516.01              | 09.08     | 0.028    |

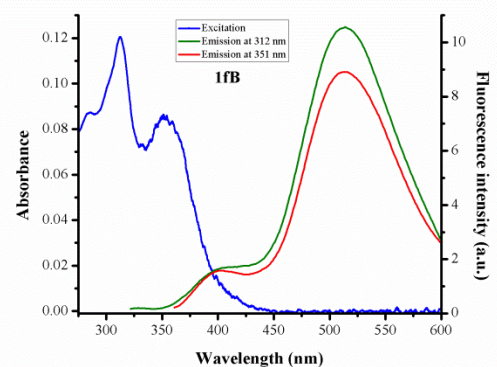

| 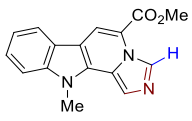<br><b>1aE</b> | UV-Vis              | Fluorescence        |           | $\Phi_F$ |
|---------------------------------------------------------------------------------------------------|---------------------|---------------------|-----------|----------|
|                                                                                                   | $\lambda_{Ex}$ (nm) | $\lambda_{Em}$ (nm) | Intensity |          |
|                                                                                                   | 296.89              | 445.08              | 251.15    |          |
|                                                                                                   | 382.08              | 443.03              | 71.75     | 0.365    |

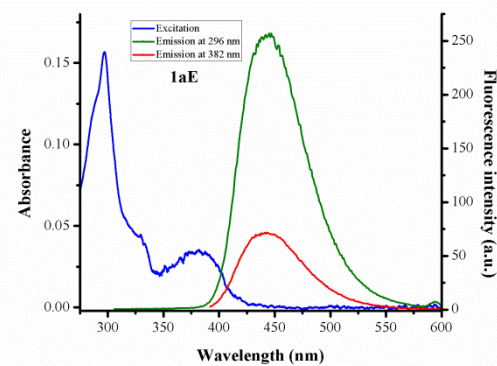

| 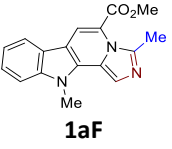<br><b>1aF</b> | UV-Vis              | Fluorescence        |               | $\Phi_F$ |
|-------------------------------------------------------------------------------------------------|---------------------|---------------------|---------------|----------|
|                                                                                                 | $\lambda_{Ex}$ (nm) | $\lambda_{Em}$ (nm) | Intensity     |          |
|                                                                                                 | 297.90<br>365.51    | 476.02<br>470.80    | 23.58<br>6.86 |          |

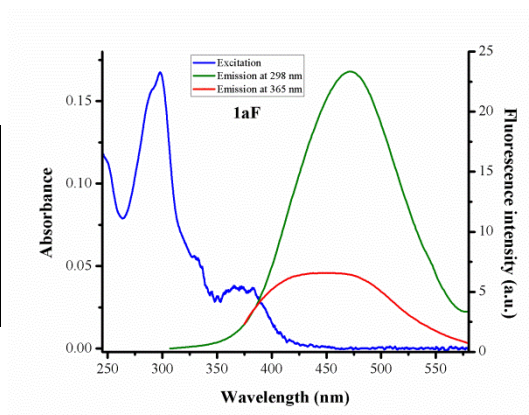

| 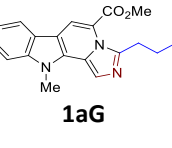<br><b>1aG</b> | UV-Vis              | Fluorescence        |              | $\Phi_F$ |
|-------------------------------------------------------------------------------------------------|---------------------|---------------------|--------------|----------|
|                                                                                                 | $\lambda_{Ex}$ (nm) | $\lambda_{Em}$ (nm) | Intensity    |          |
|                                                                                                 | 300.34<br>379.89    | 499.37<br>489.61    | 6.82<br>1.91 |          |

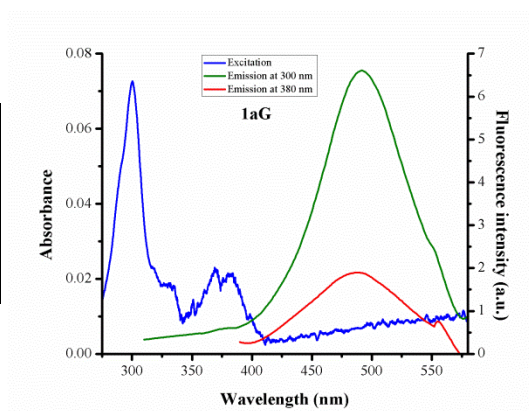

| 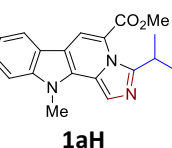<br><b>1aH</b> | UV-Vis              | Fluorescence        |                | $\Phi_F$ |
|---------------------------------------------------------------------------------------------------|---------------------|---------------------|----------------|----------|
|                                                                                                   | $\lambda_{Ex}$ (nm) | $\lambda_{Em}$ (nm) | Intensity      |          |
|                                                                                                   | 300.29<br>370.37    | 499.79<br>494.99    | 27.77<br>07.40 |          |

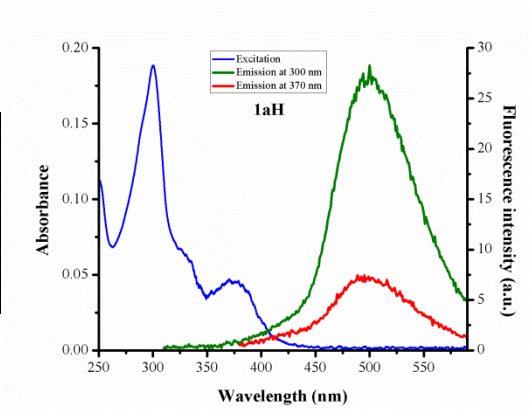

| 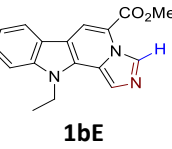<br><b>1bE</b> | UV-Vis              | Fluorescence        |                 | $\Phi_F$ |
|---------------------------------------------------------------------------------------------------|---------------------|---------------------|-----------------|----------|
|                                                                                                   | $\lambda_{Ex}$ (nm) | $\lambda_{Em}$ (nm) | Intensity       |          |
|                                                                                                   | 297.61<br>382.06    | 446.96<br>449.49    | 319.92<br>93.63 |          |

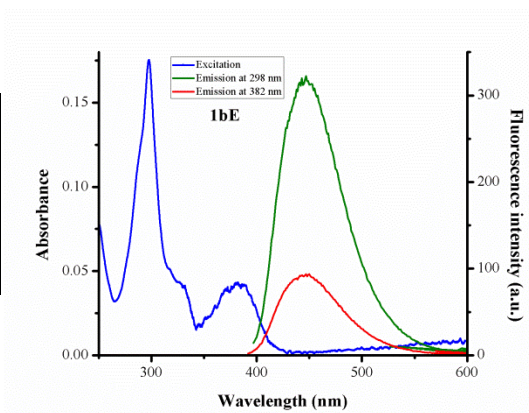

| 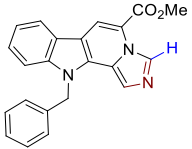<br><b>1dE</b> | UV-Vis              |  | Fluorescence        |           | $\Phi_F$ |
|-------------------------------------------------------------------------------------------------|---------------------|--|---------------------|-----------|----------|
|                                                                                                 | $\lambda_{Ex}$ (nm) |  | $\lambda_{Em}$ (nm) | Intensity |          |
|                                                                                                 | 295.81              |  | 448.06              | 95.62     | 0.140    |
|                                                                                                 | 372.37              |  | 450.94              | 26.68     | 0.106    |

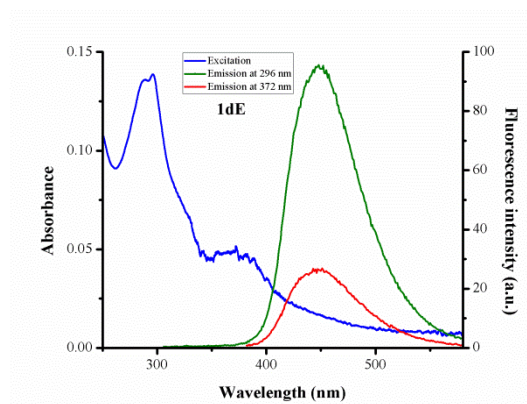

| 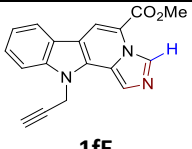<br><b>1fE</b> | UV-Vis              |  | Fluorescence        |           | $\Phi_F$ |
|-------------------------------------------------------------------------------------------------|---------------------|--|---------------------|-----------|----------|
|                                                                                                 | $\lambda_{Ex}$ (nm) |  | $\lambda_{Em}$ (nm) | Intensity |          |
|                                                                                                 | 295.12              |  | 451.96              | 326.41    | 0.311    |
|                                                                                                 | 372.36              |  | 448.03              | 88.25     | 0.331    |

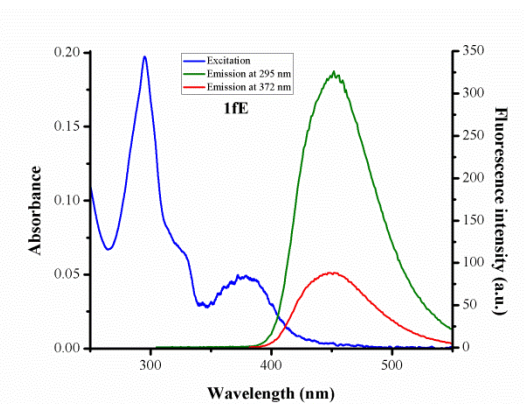

| 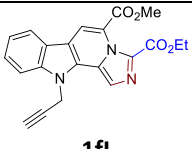<br><b>1fi</b> | UV-Vis              |  | Fluorescence        |           | $\Phi_F$ |
|---------------------------------------------------------------------------------------------------|---------------------|--|---------------------|-----------|----------|
|                                                                                                   | $\lambda_{Ex}$ (nm) |  | $\lambda_{Em}$ (nm) | Intensity |          |
|                                                                                                   | 309.03              |  | 465.90              | 69.43     | 0.171    |
|                                                                                                   | 349.60              |  | 465.41              | 48.52     | 0.217    |

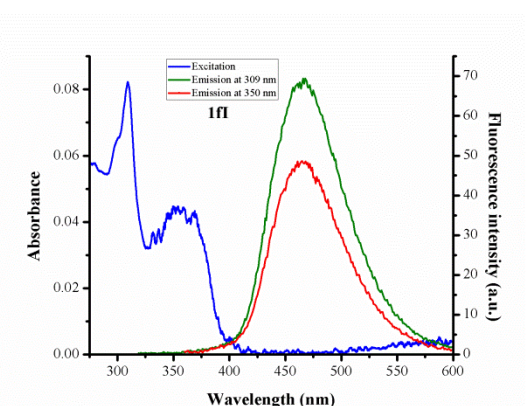

| 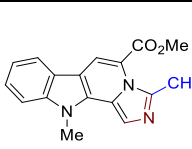<br><b>2aK</b> | UV-Vis              |  | Fluorescence        |           | $\Phi_F$ |
|---------------------------------------------------------------------------------------------------|---------------------|--|---------------------|-----------|----------|
|                                                                                                   | $\lambda_{Ex}$ (nm) |  | $\lambda_{Em}$ (nm) | Intensity |          |
|                                                                                                   | 297.06              |  | 446.81              | 268.66    | 0.327    |
|                                                                                                   | 382.28              |  | 443.93              | 77.77     | 0.384    |

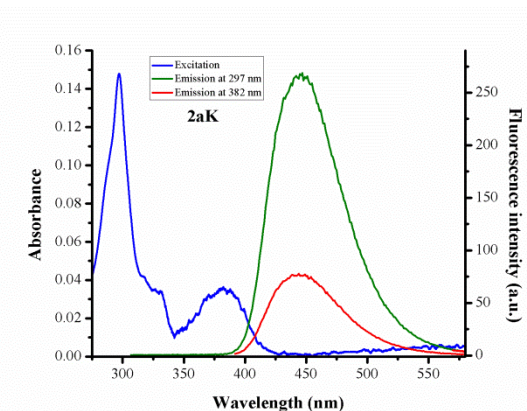

Supplement: c8ob02705f1.pdf [file c8ob02705f1.pdf]
